# Supplementary material for: Rapid Scaling Up of Insecticide-Treated Bed Net Coverage in Africa and Its Relationship with Development Assistance for Health: A Systematic Synthesis of Supply, Distribution, and Household Survey Data
Source: PubMed Central journal article supplement (PMC2923089; doi:10.1371/journal.pmed.1000328), 2010-08-17

**Figure S2. Data and model estimates of ITN use in children under 5 coverage for 44 African countries.** Data are: survey estimates during the rainy season (red diamonds); and survey estimates during the dry season (yellow diamonds). Model estimates at the national-level are shown as blue lines with dotted lines indicating 95% uncertainty intervals. Model estimates for the population at risk malaria are shown as green lines with dotted lines indicating 95% uncertainty intervals. Years indicate the mid-point of the calendar year. Note that not all symbols are present for each country.

# Angola

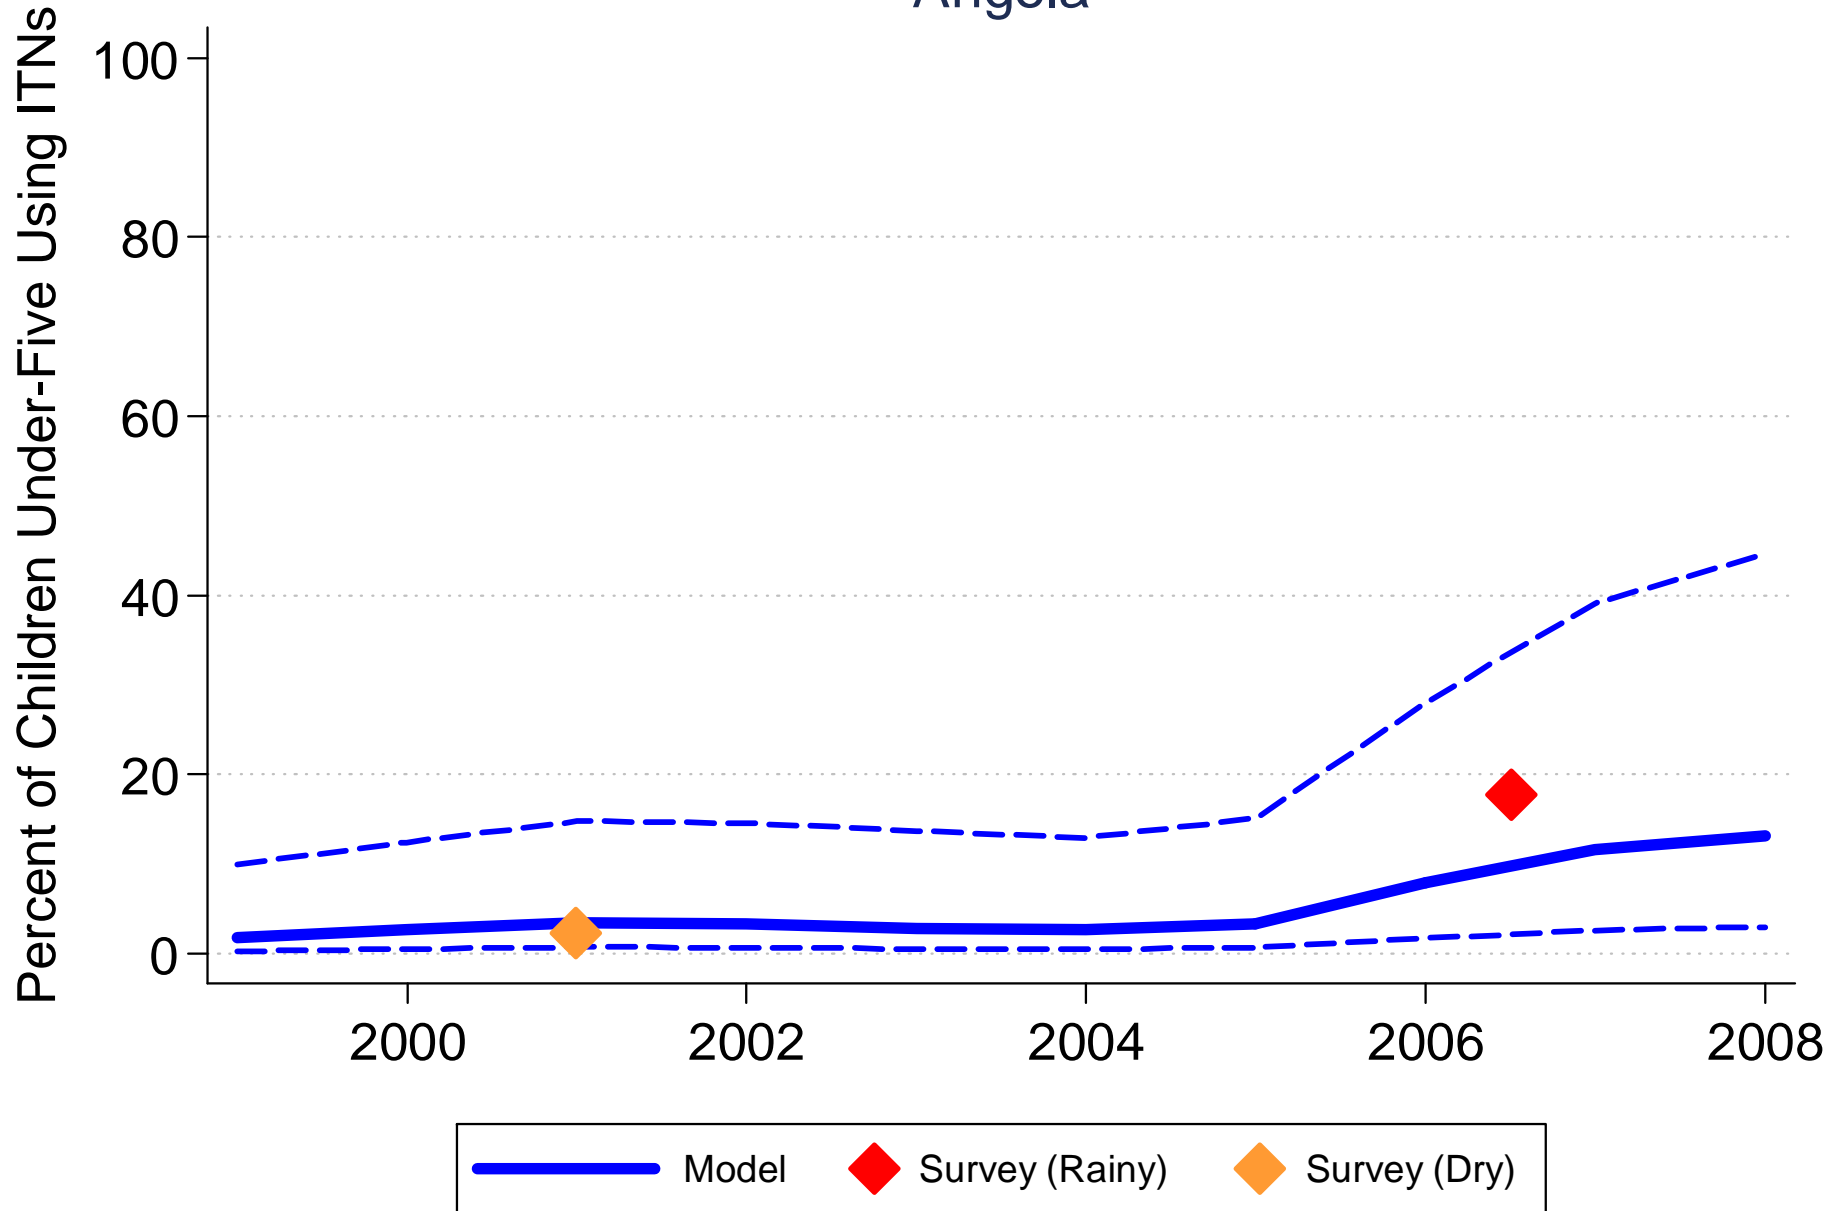

# Benin

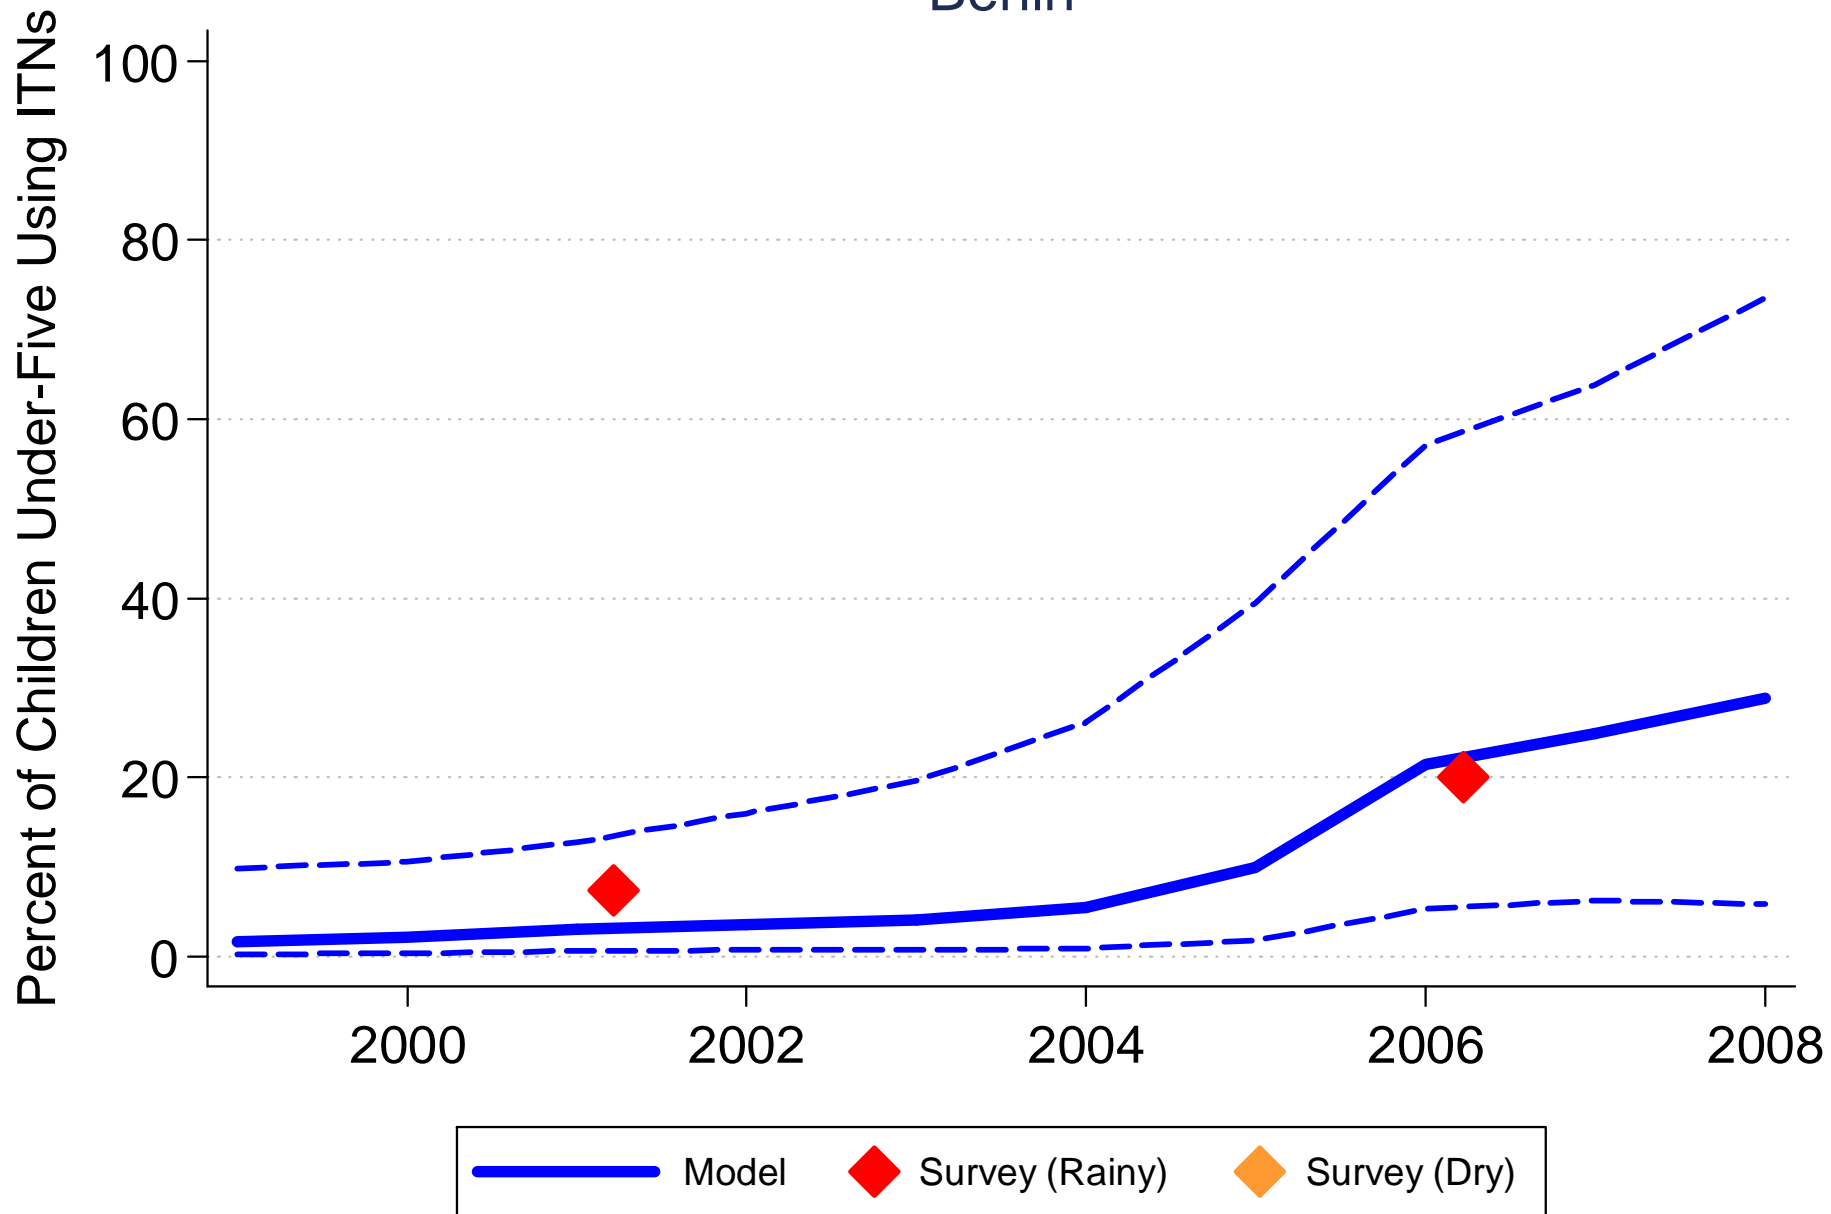

# Botswana

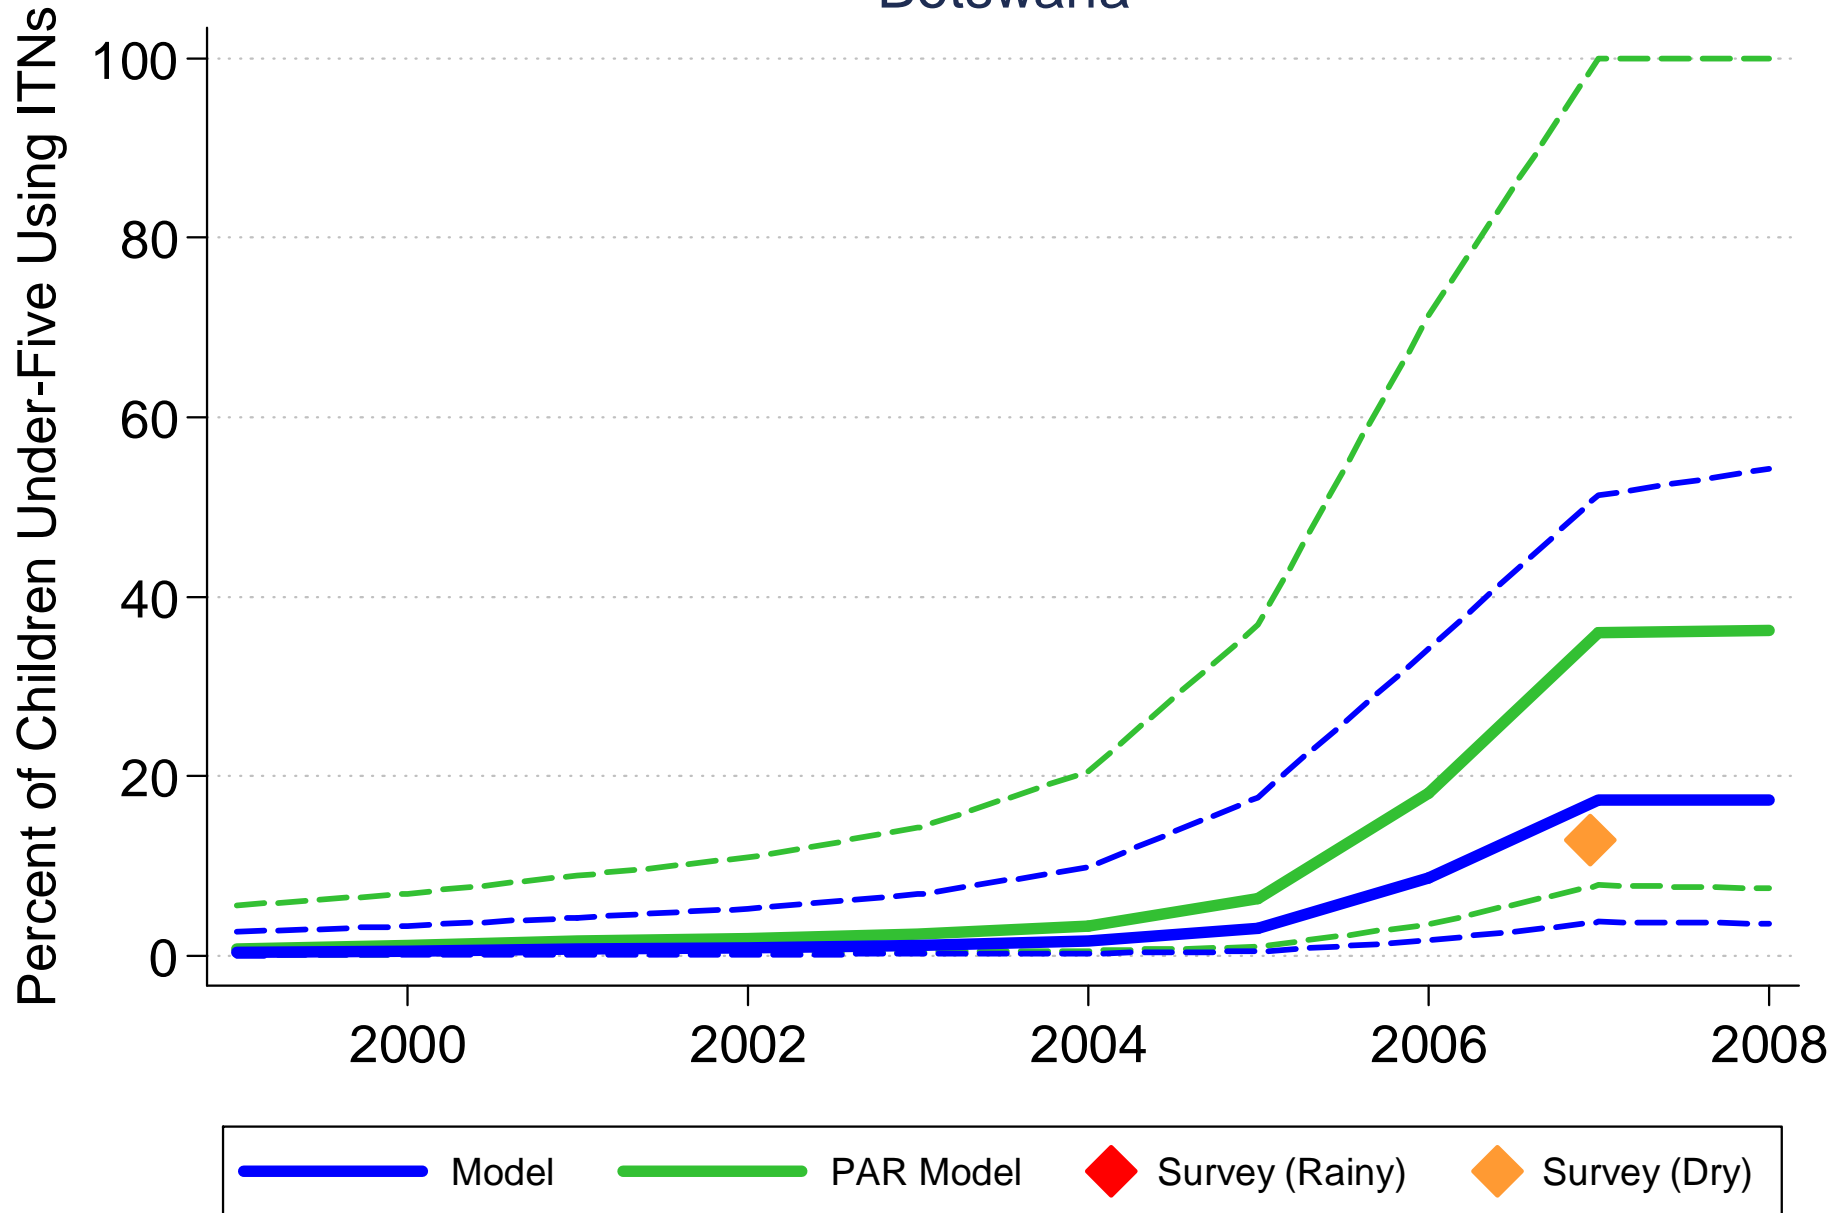

# Burkina Faso

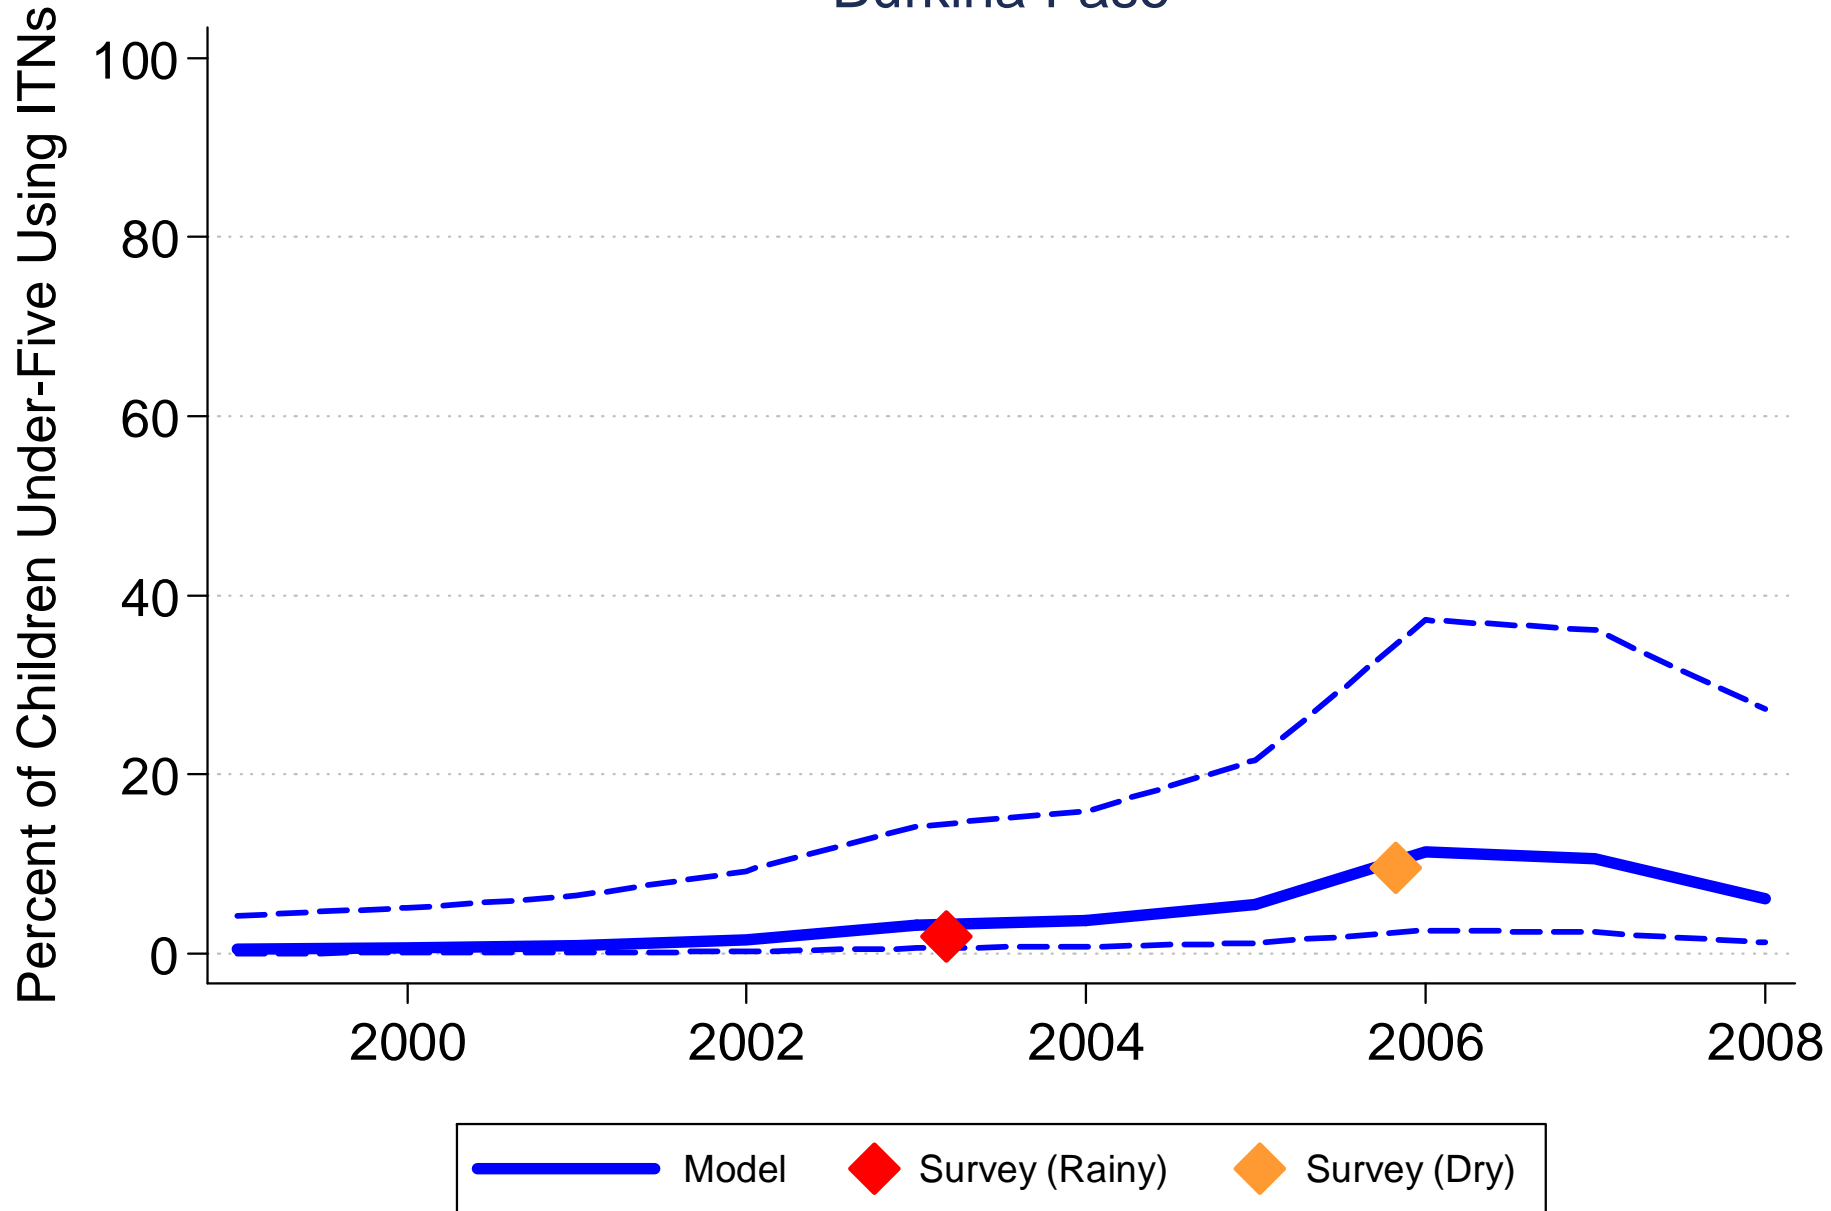

# Burundi

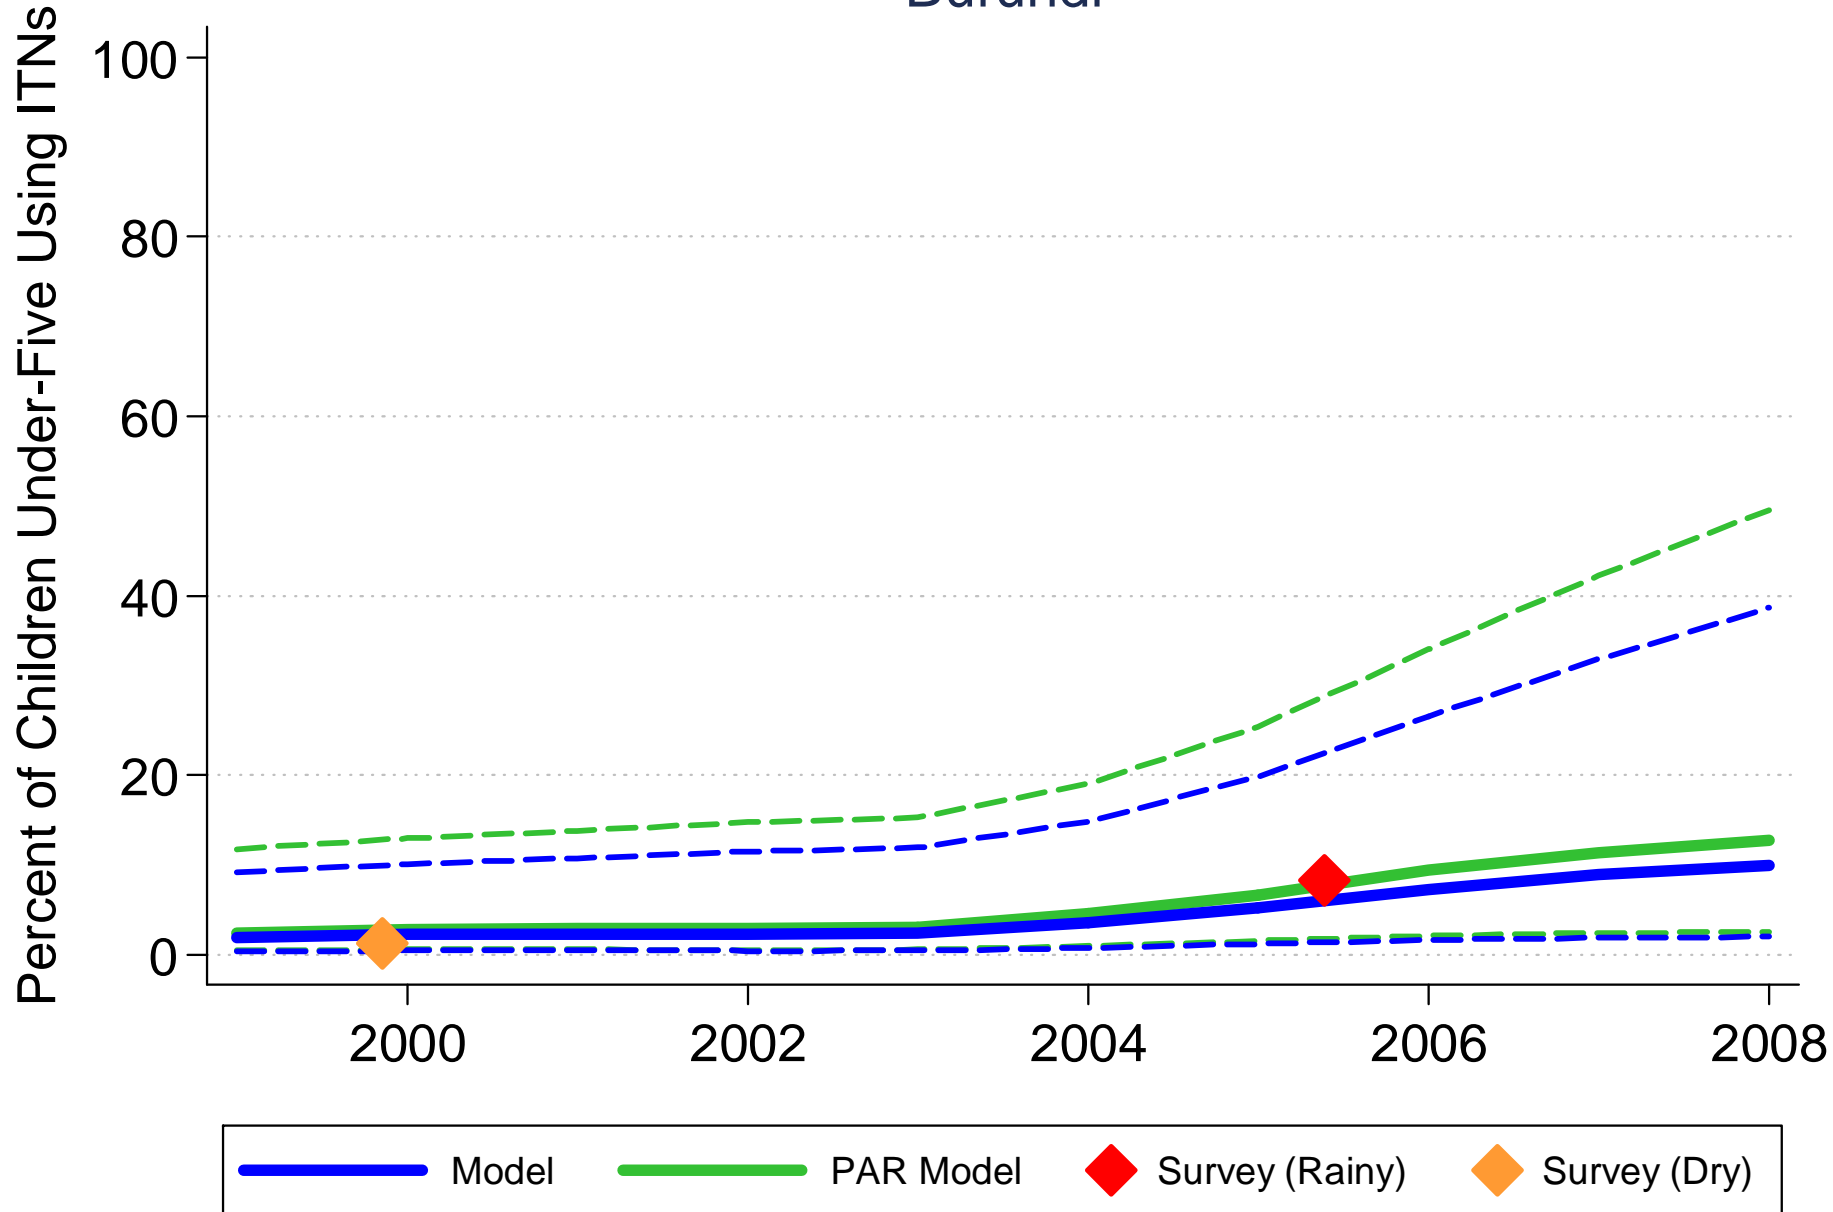

# Cameroon

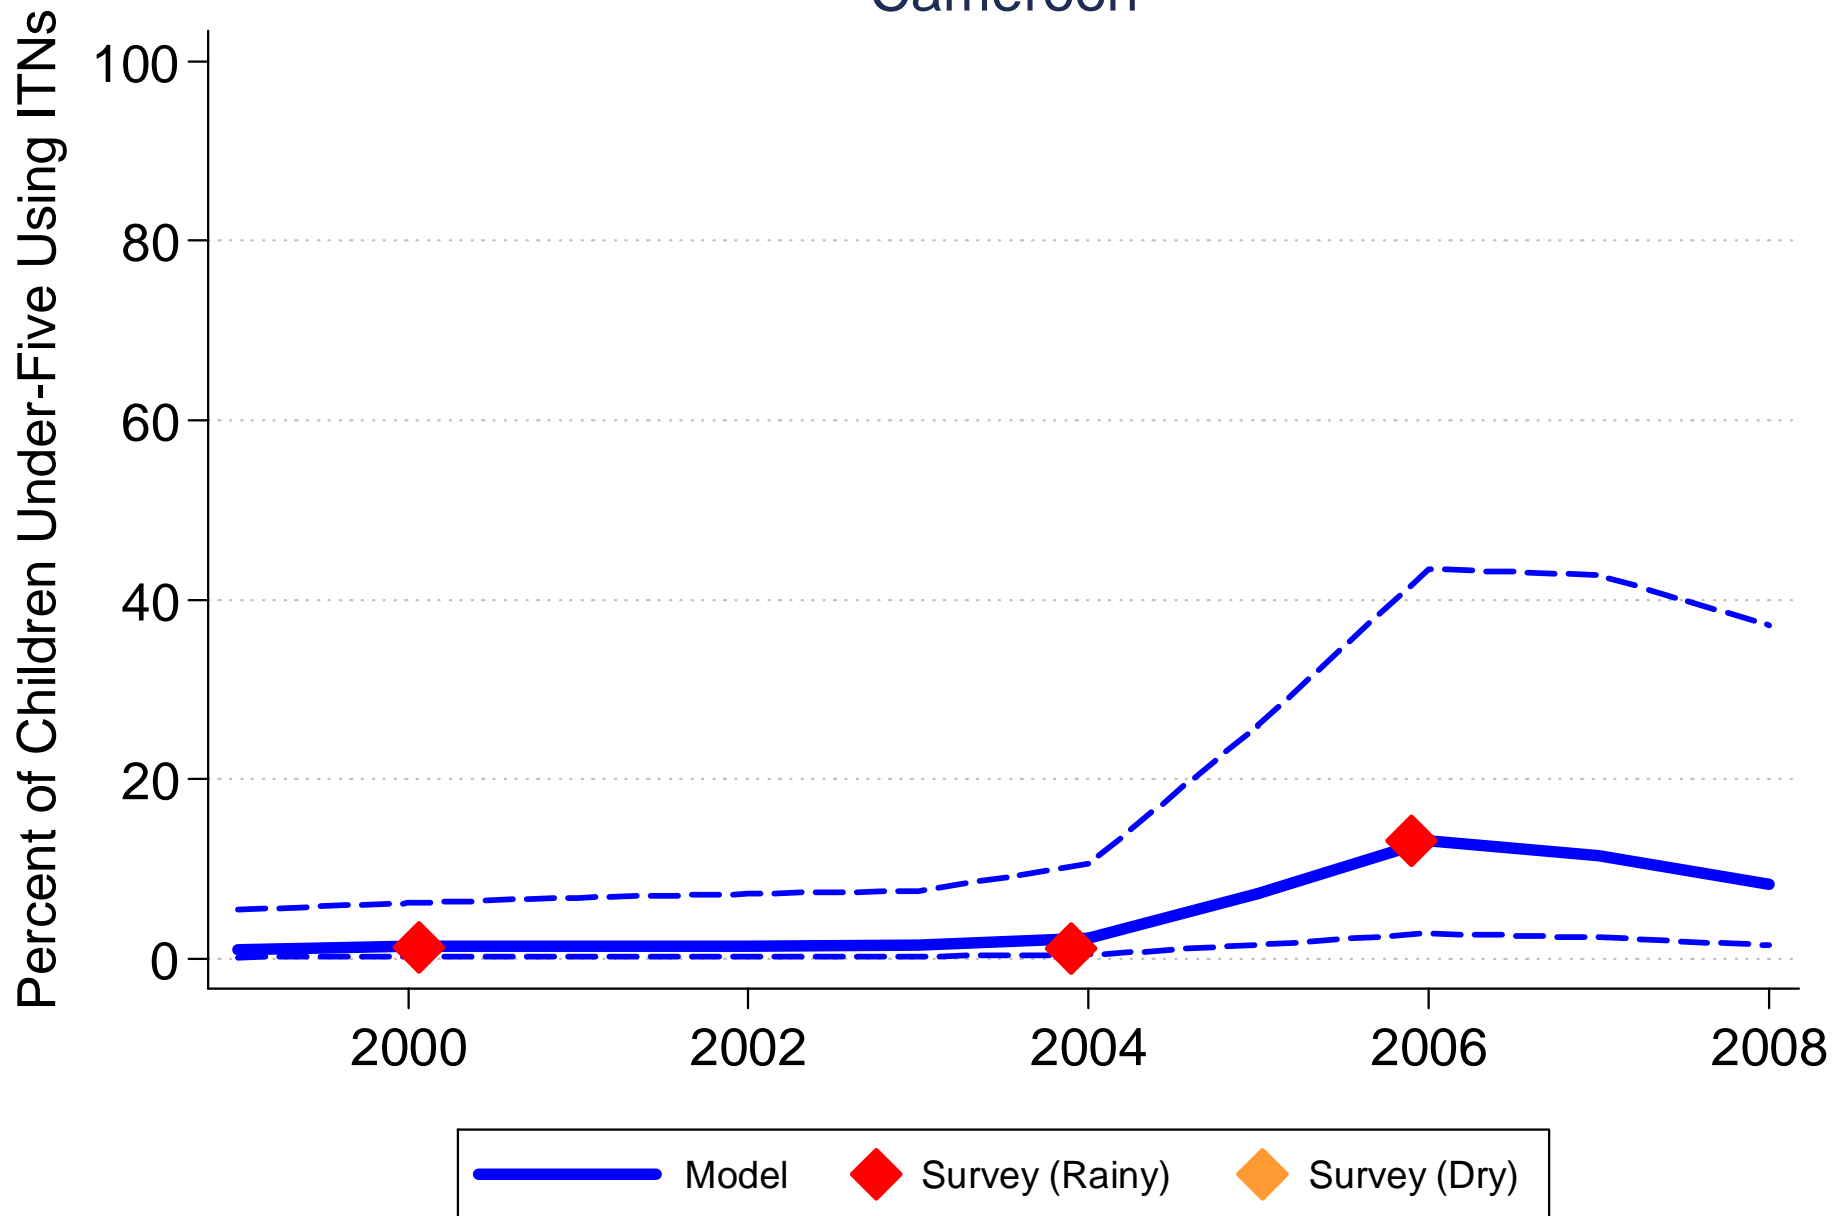

# Central African Republic

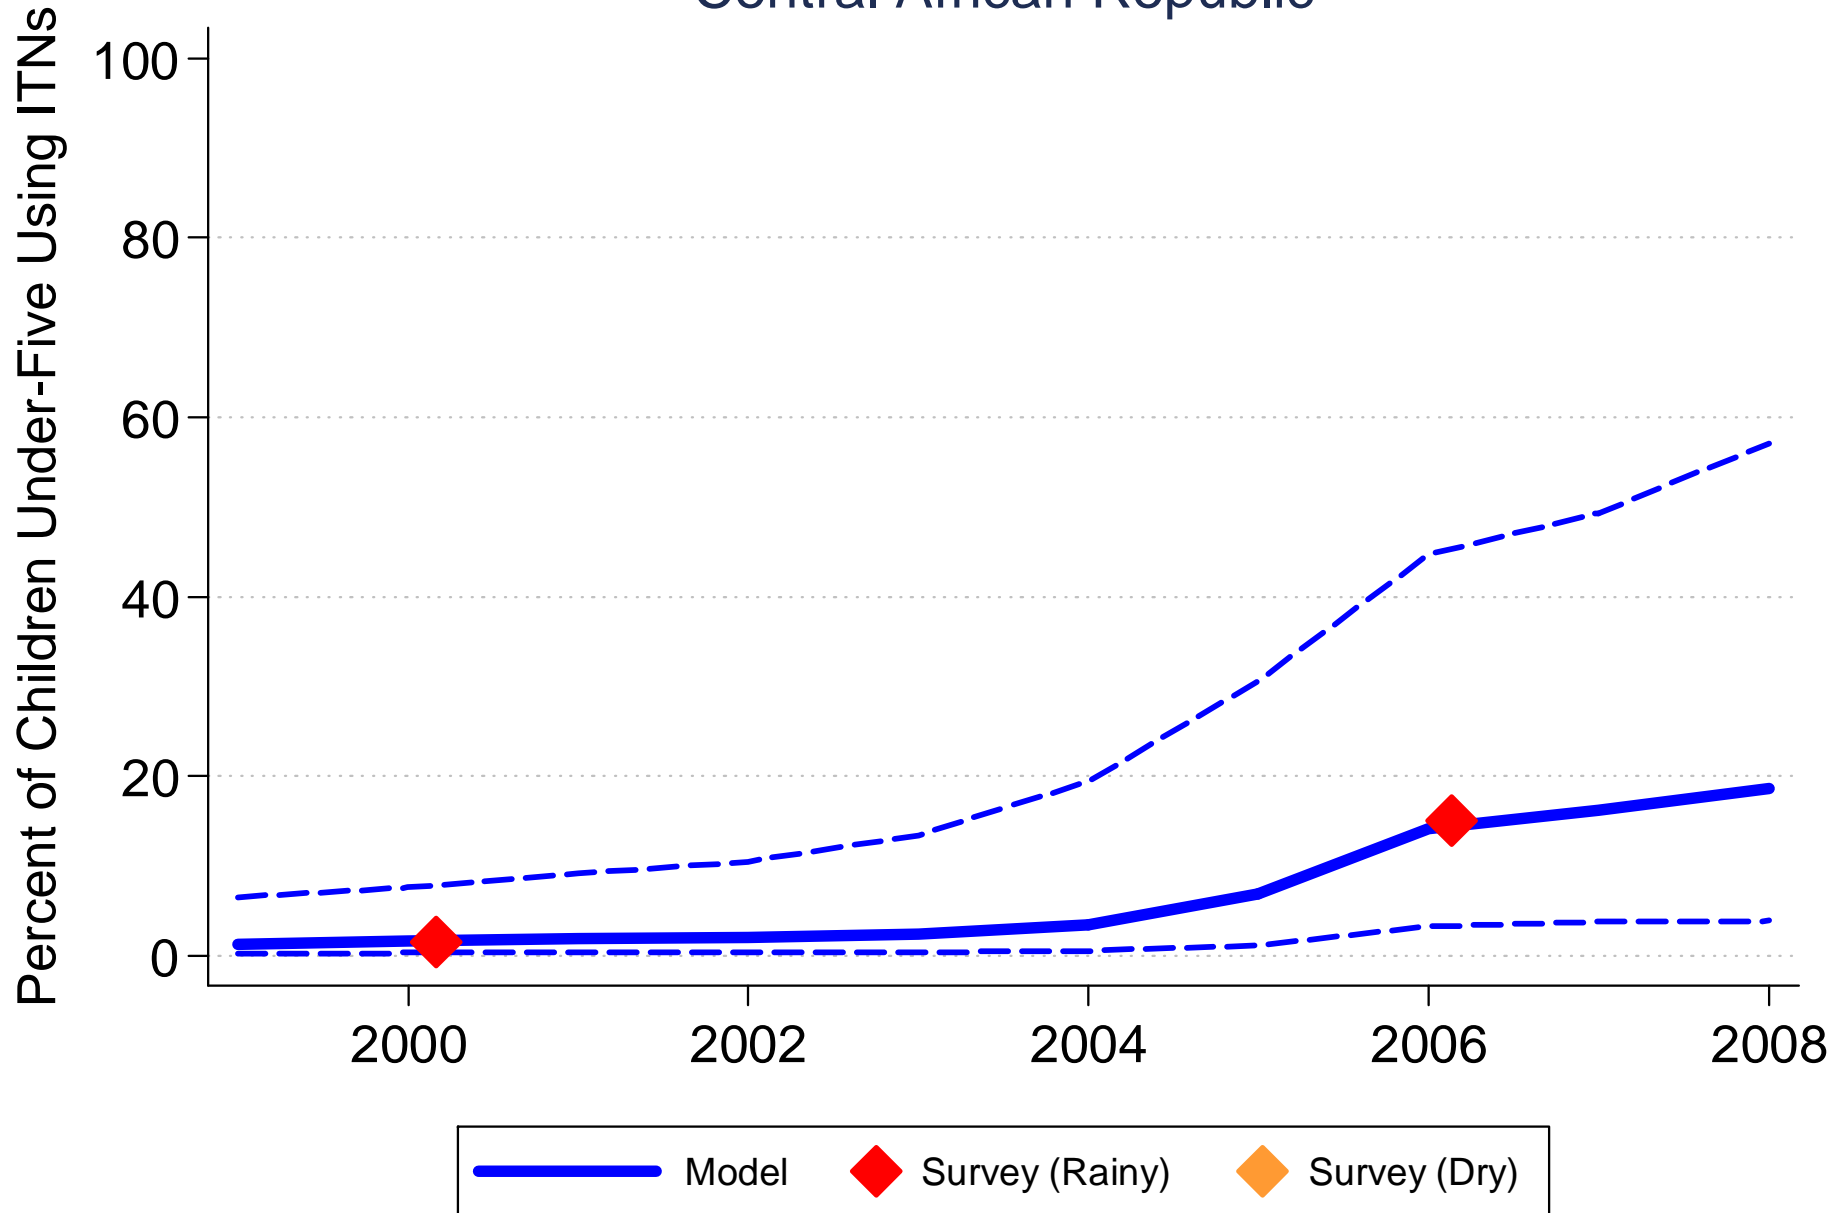



# Chad

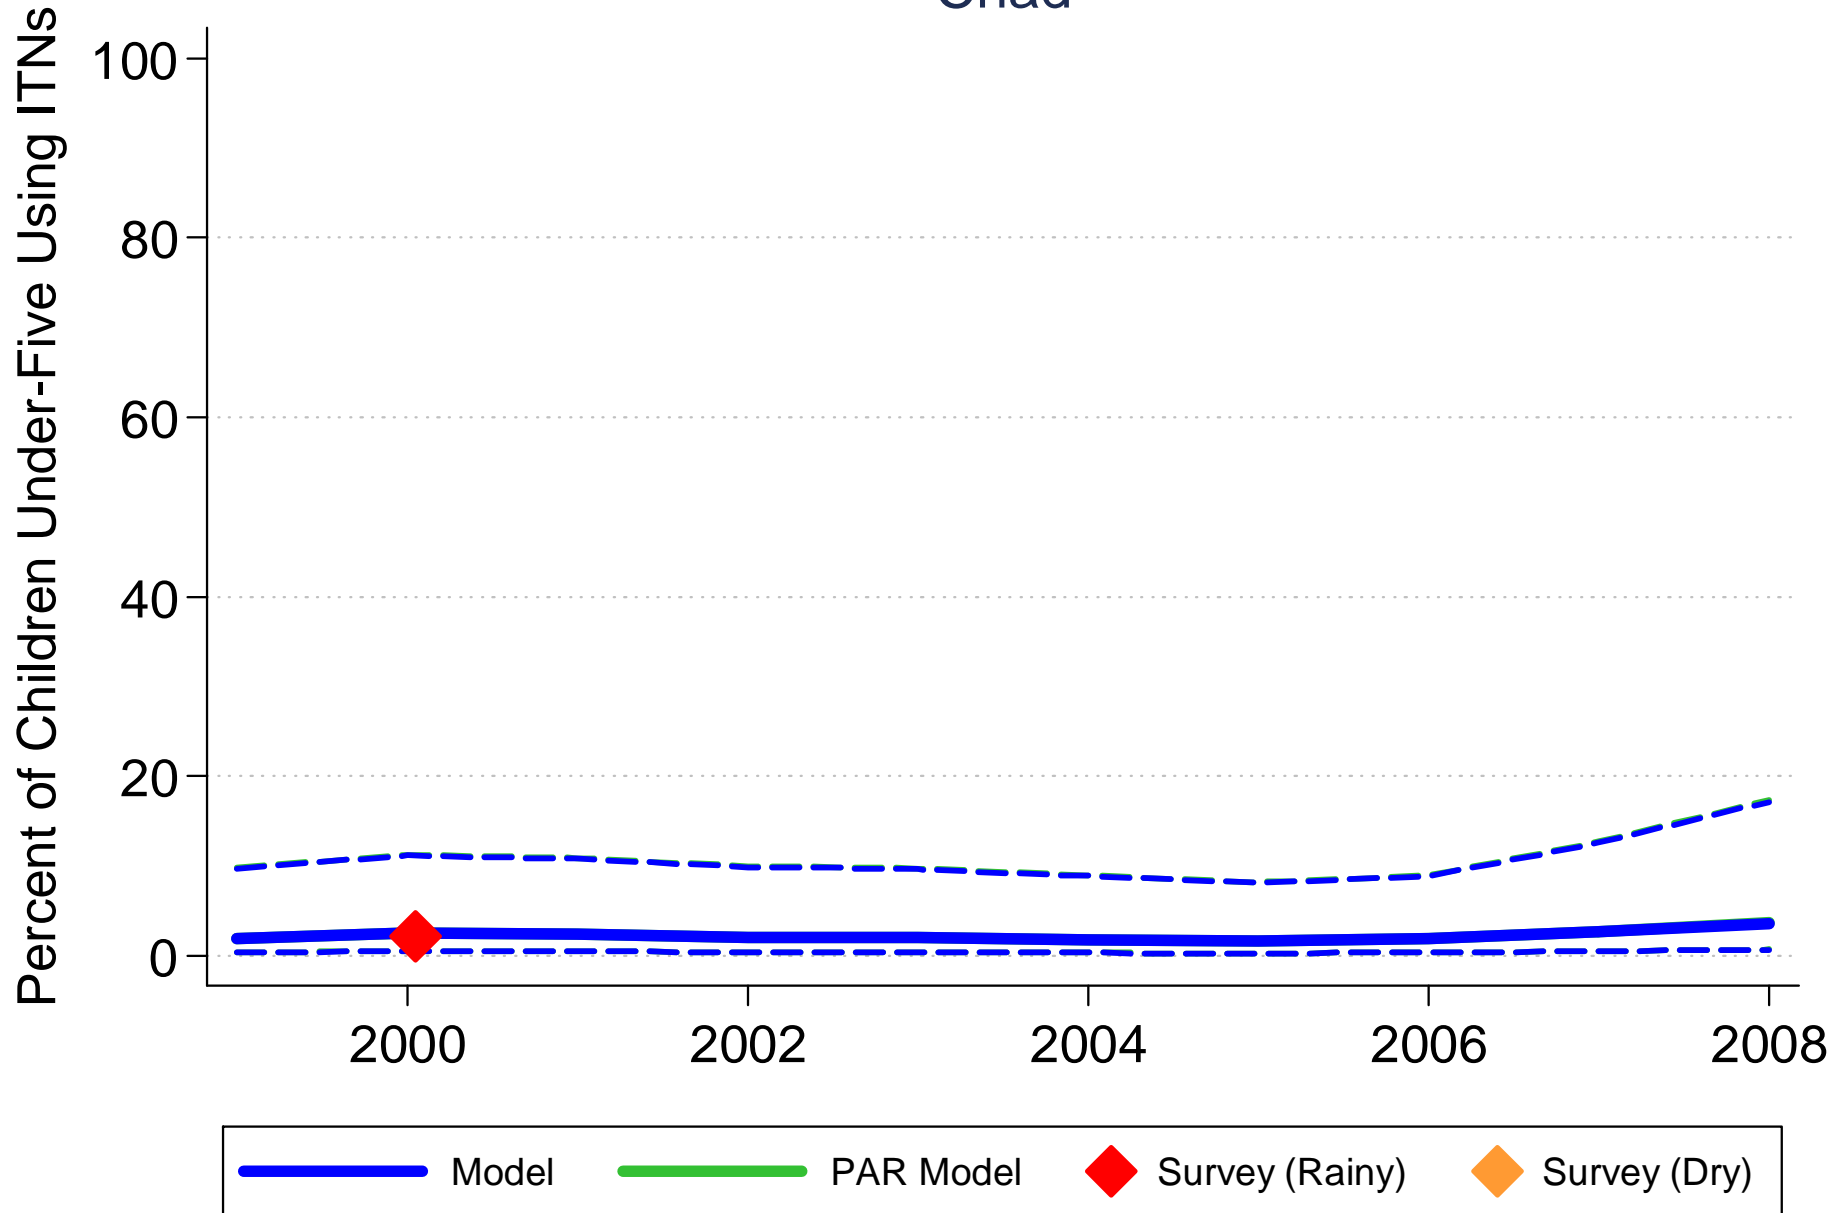

# Comoros

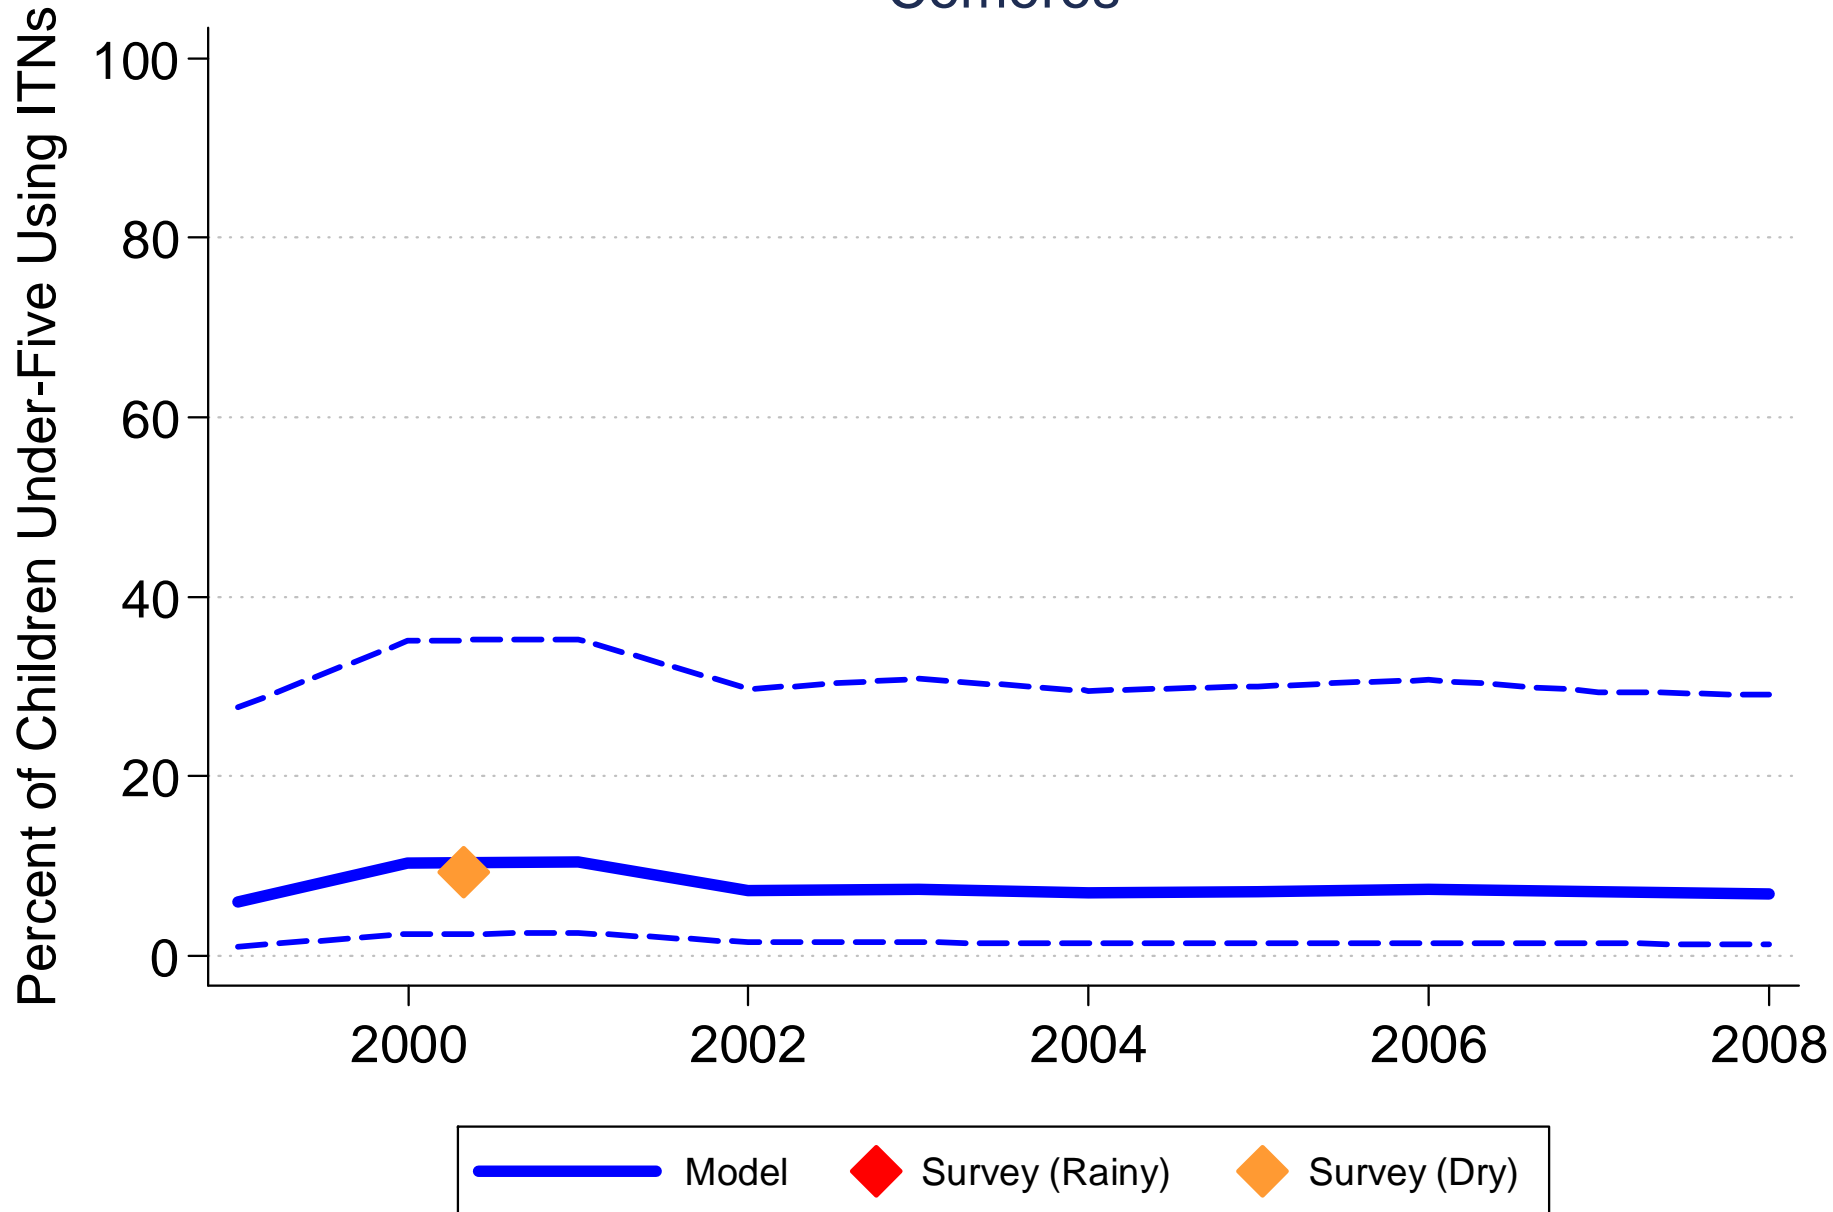

# Congo

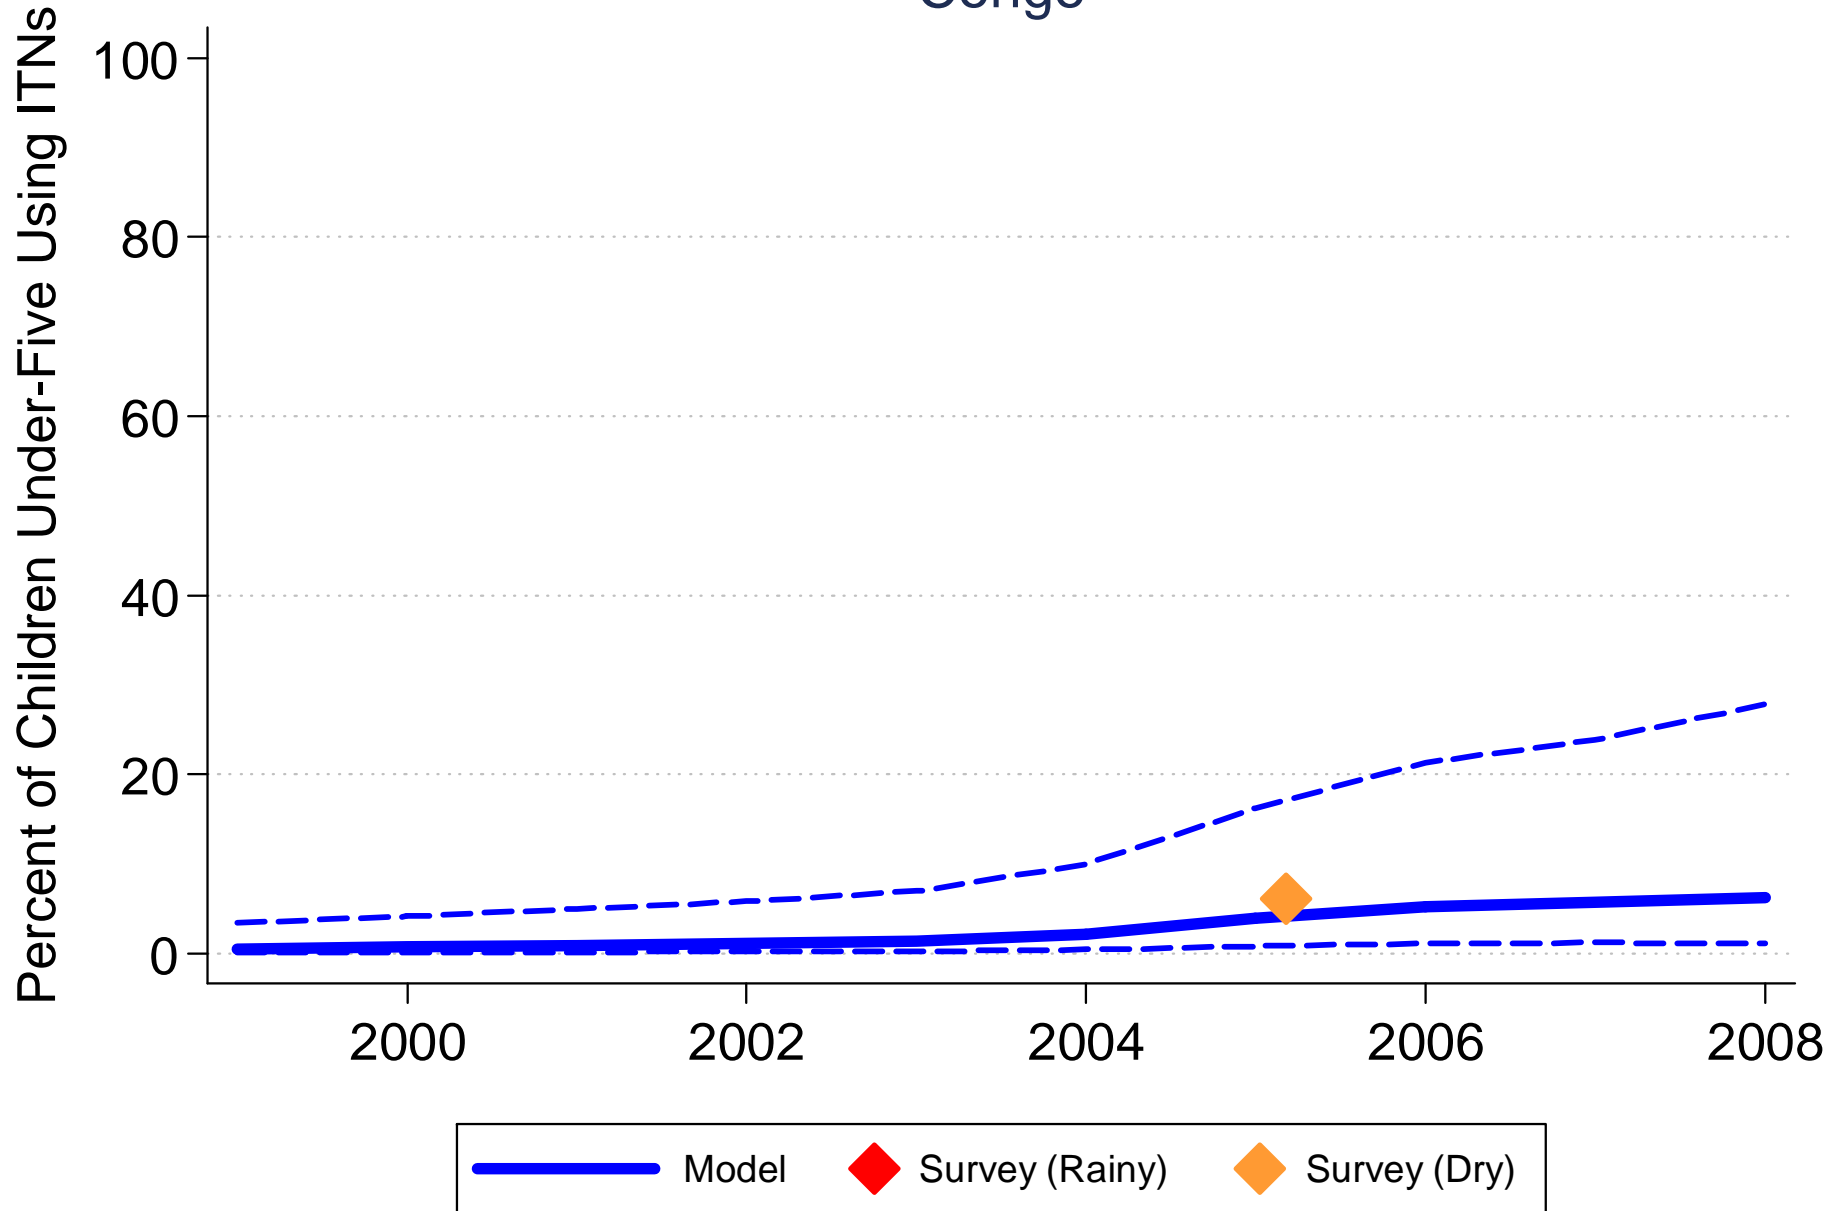

# Cote d'Ivoire

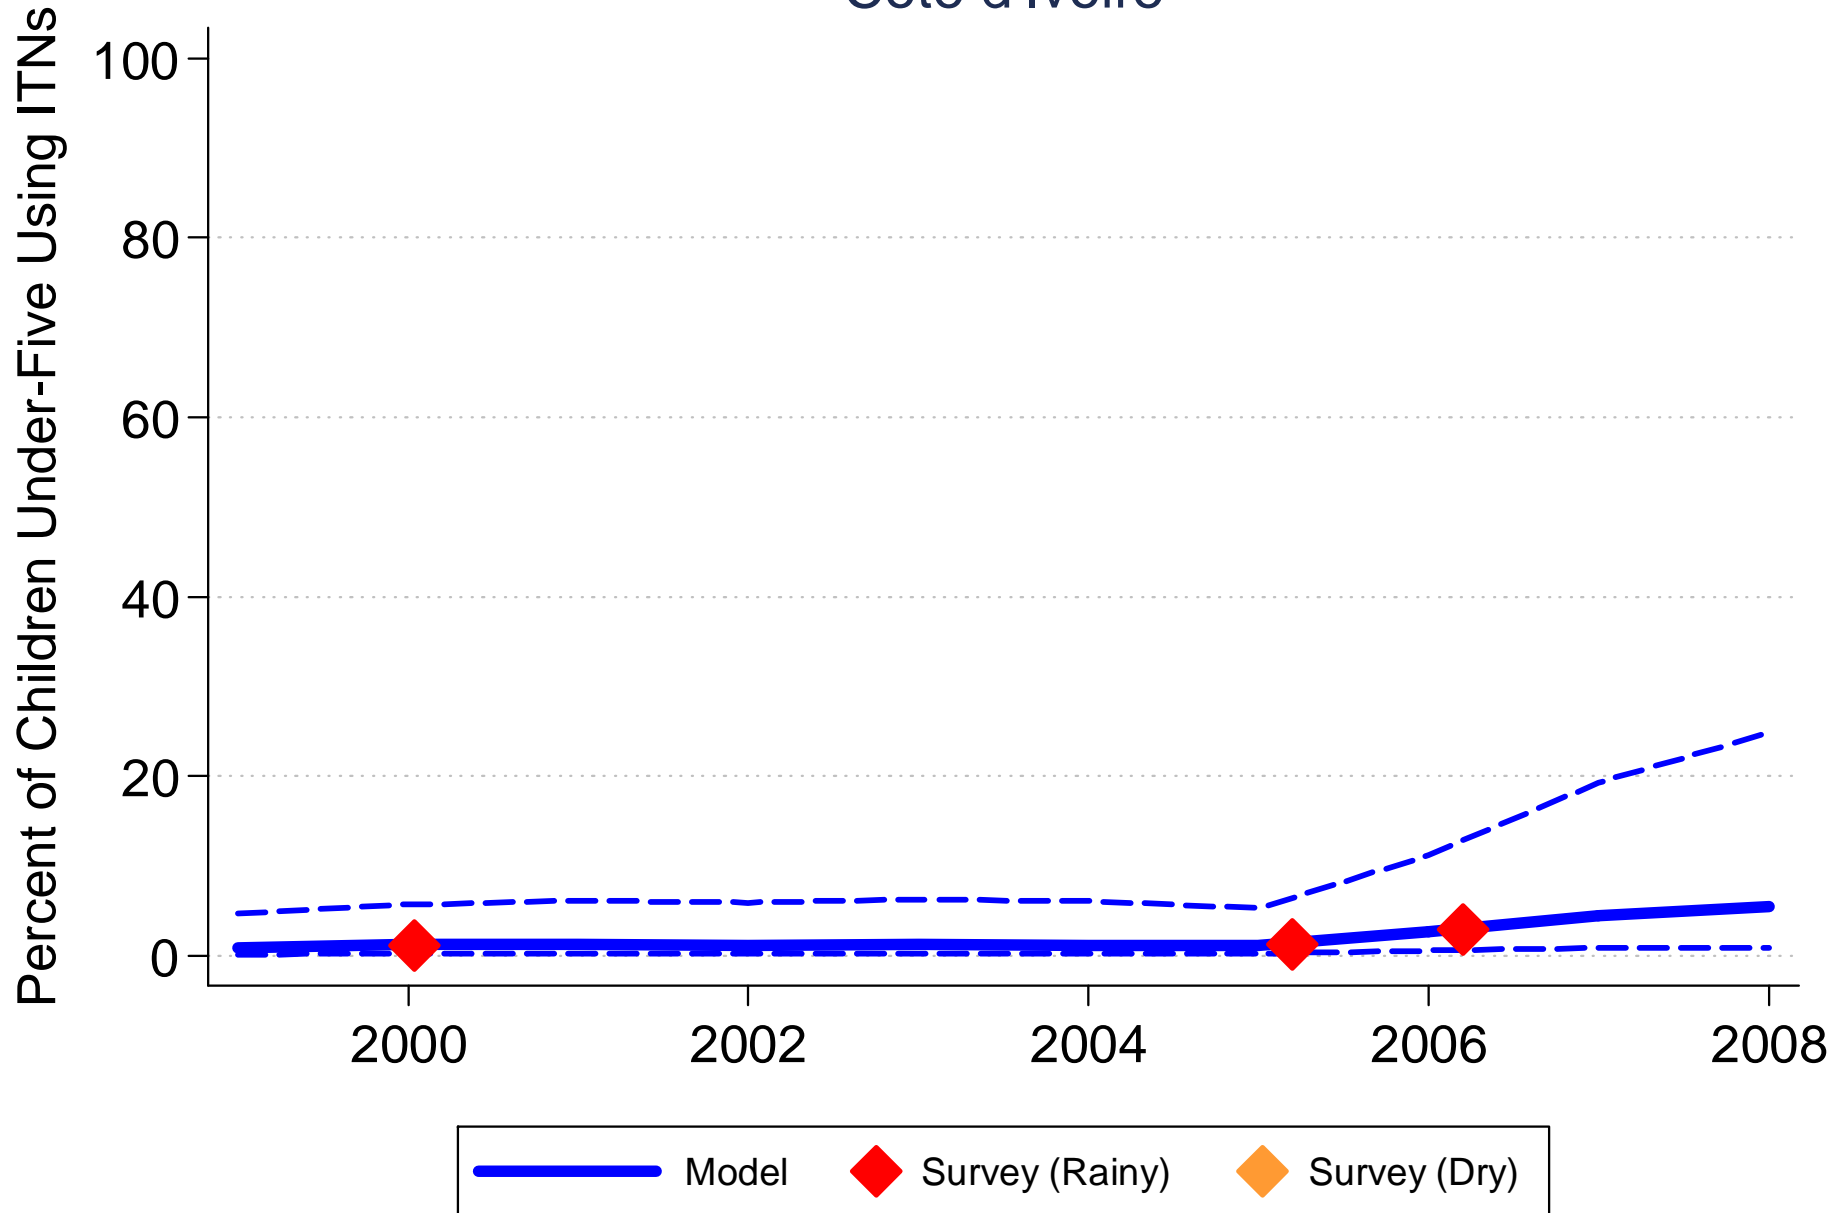

# Dem. Rep. of Congo

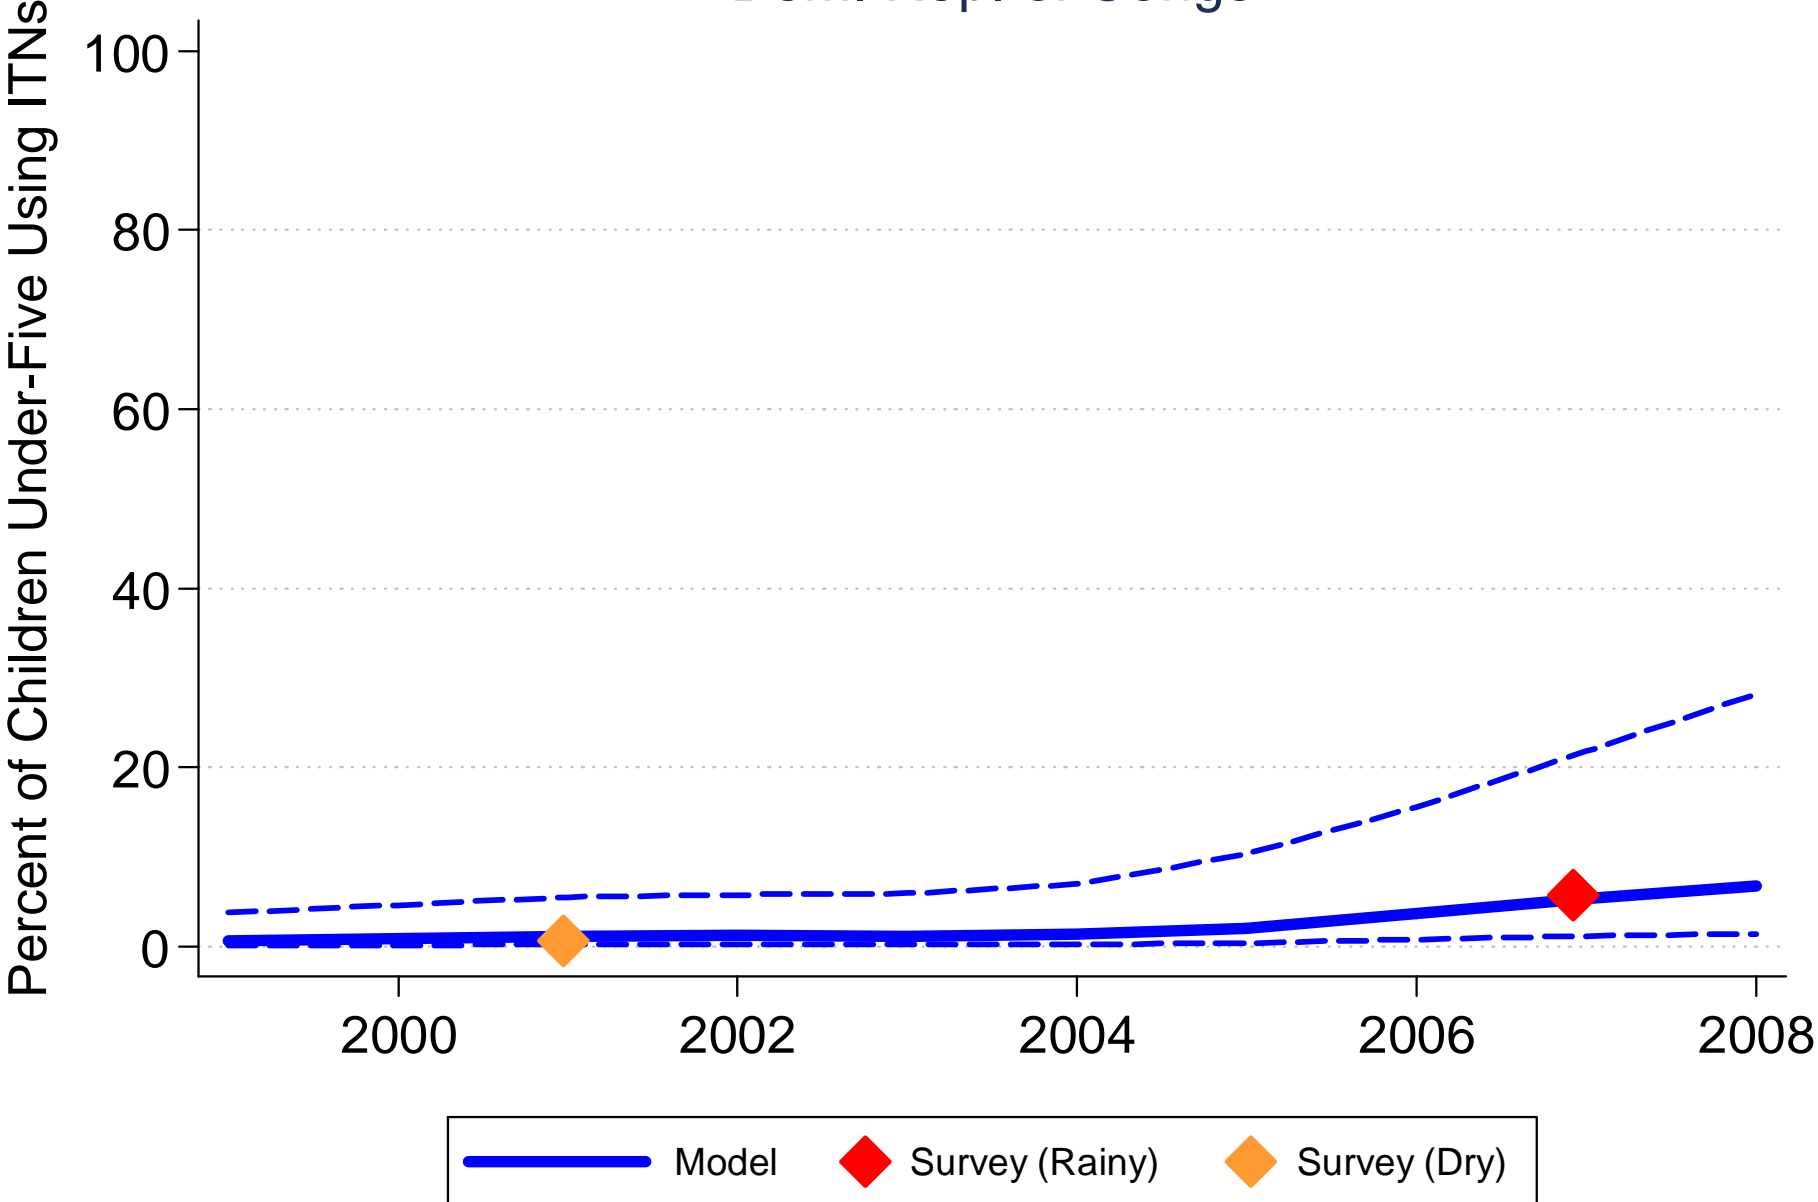

# Djibouti

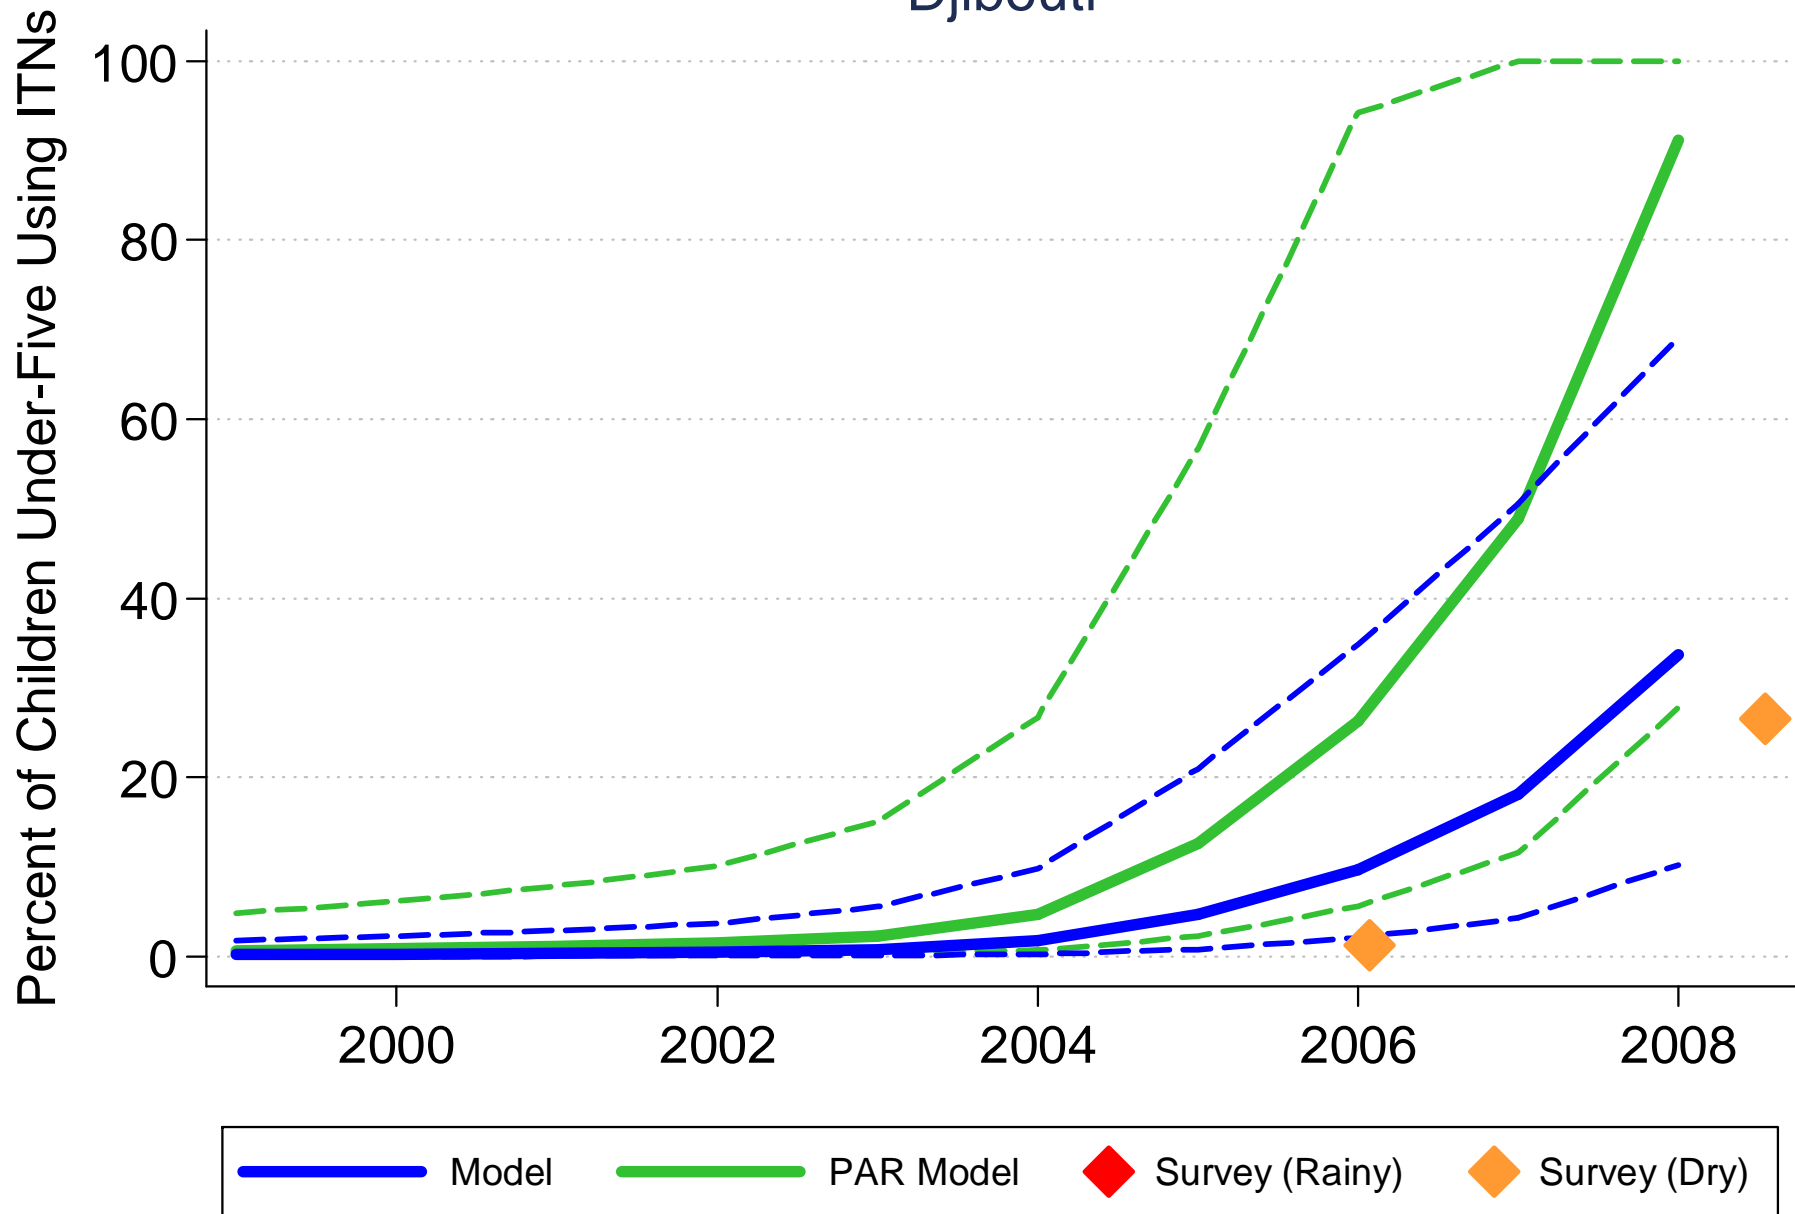

# Equatorial Guinea

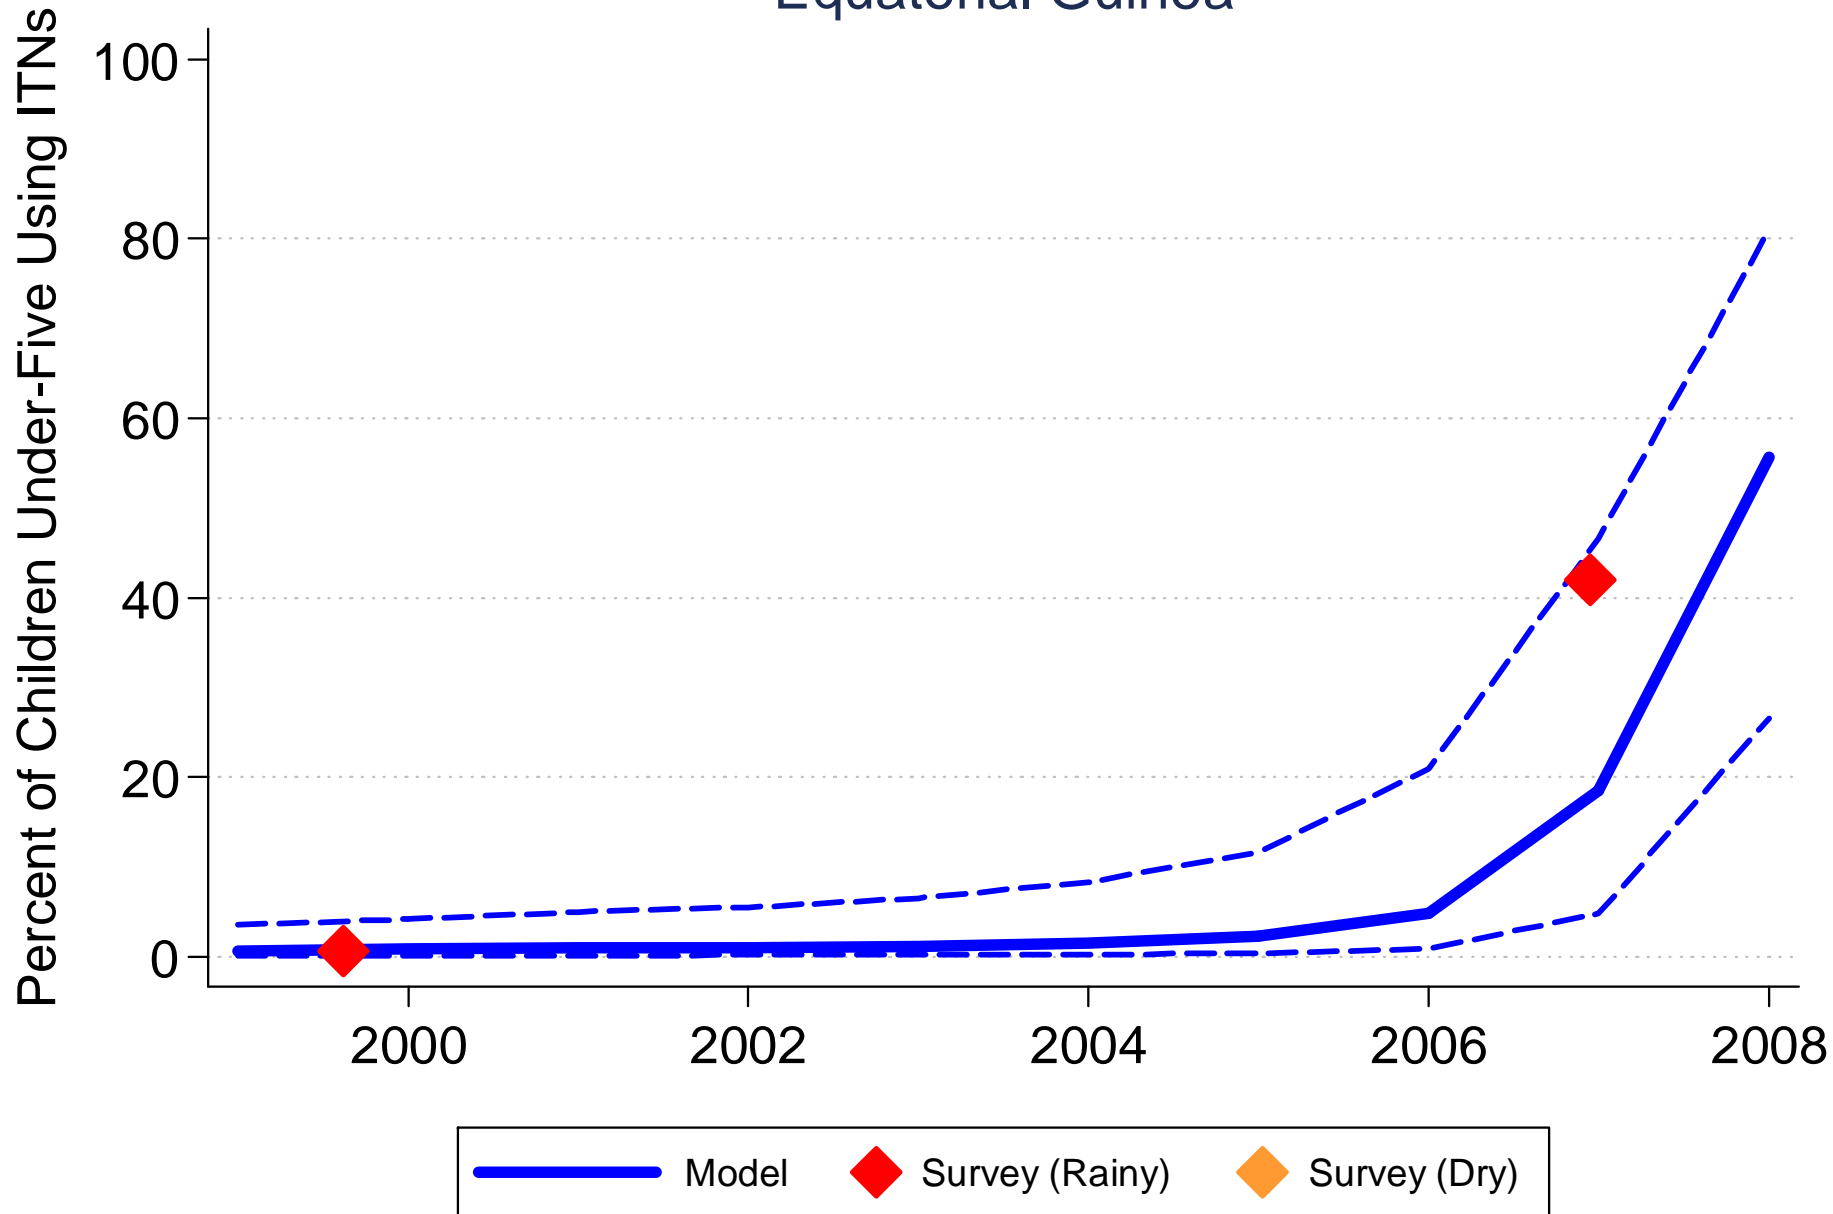

# Eritrea

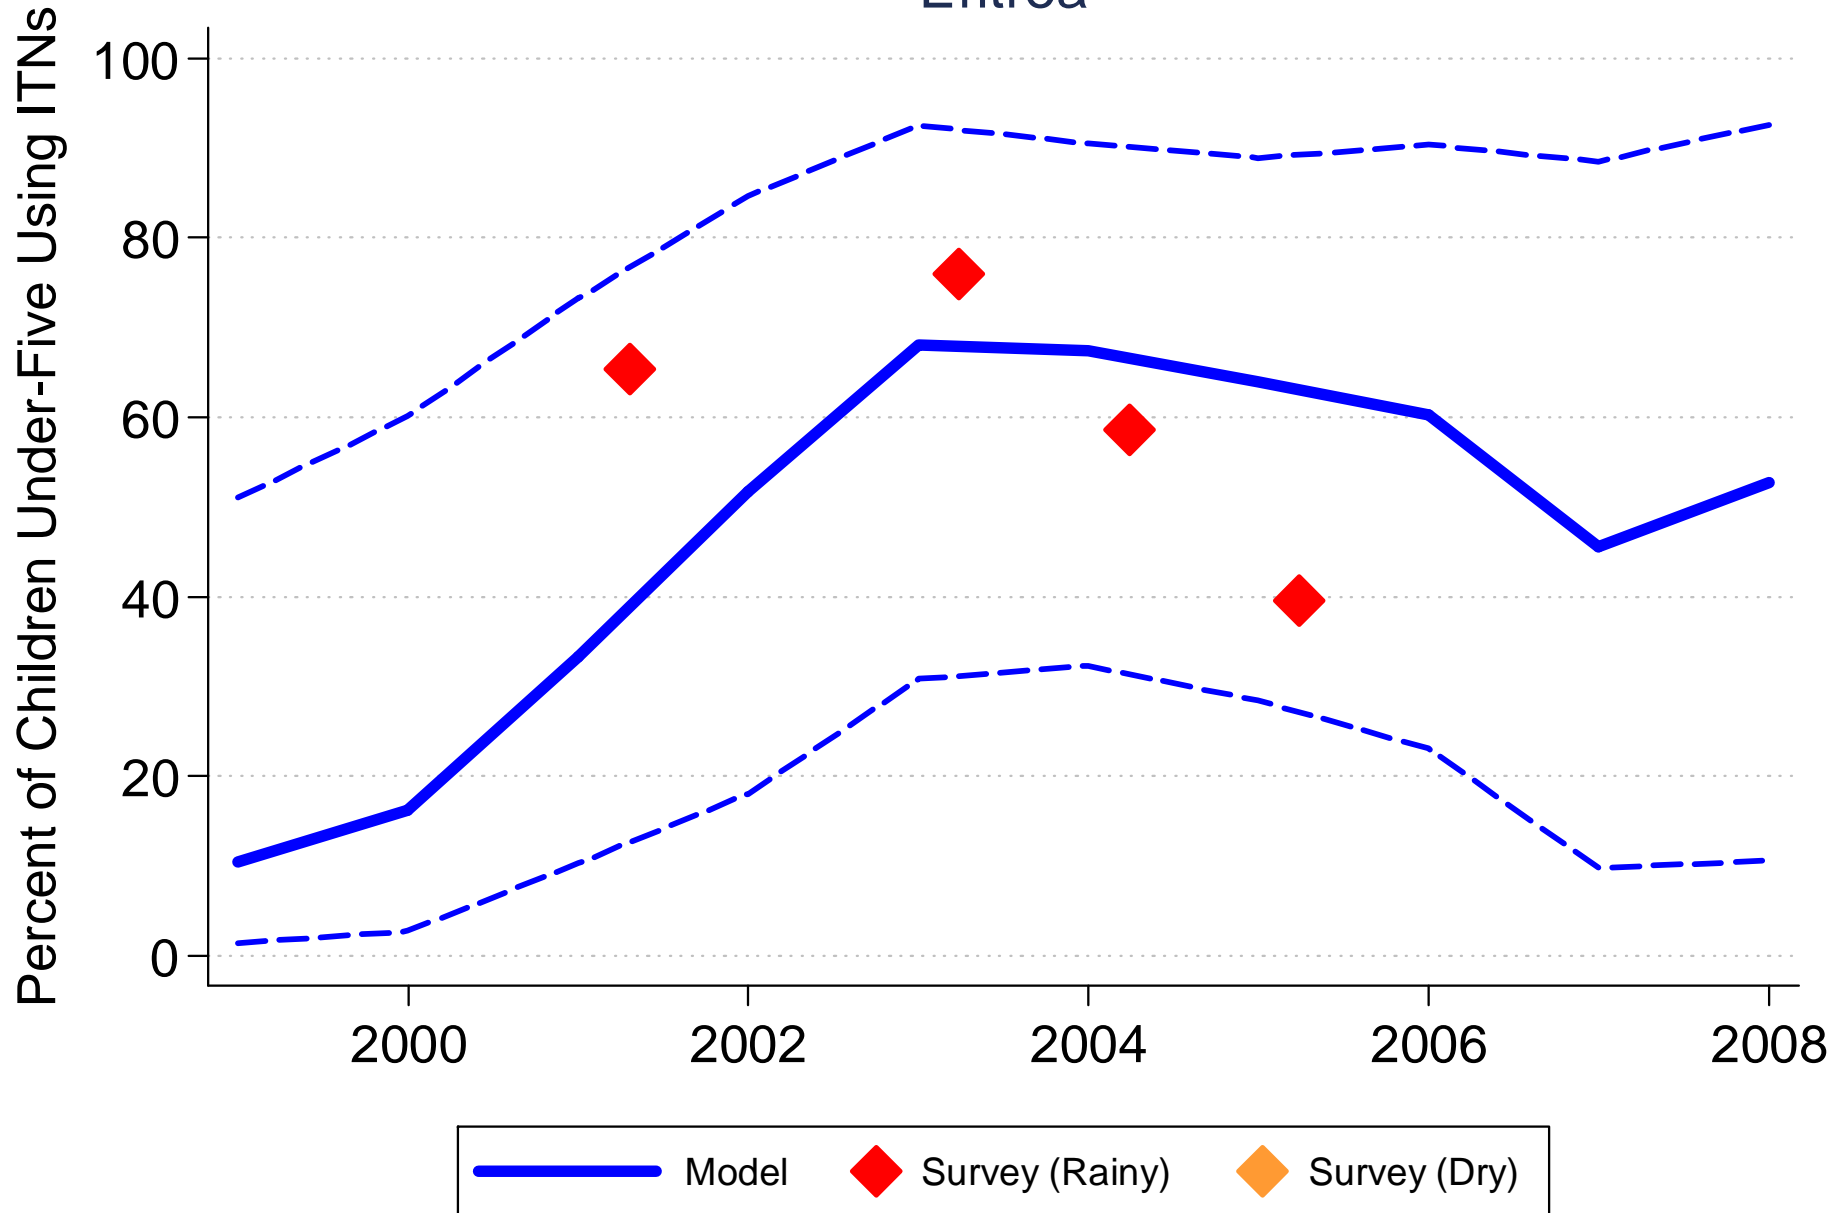



# Ethiopia

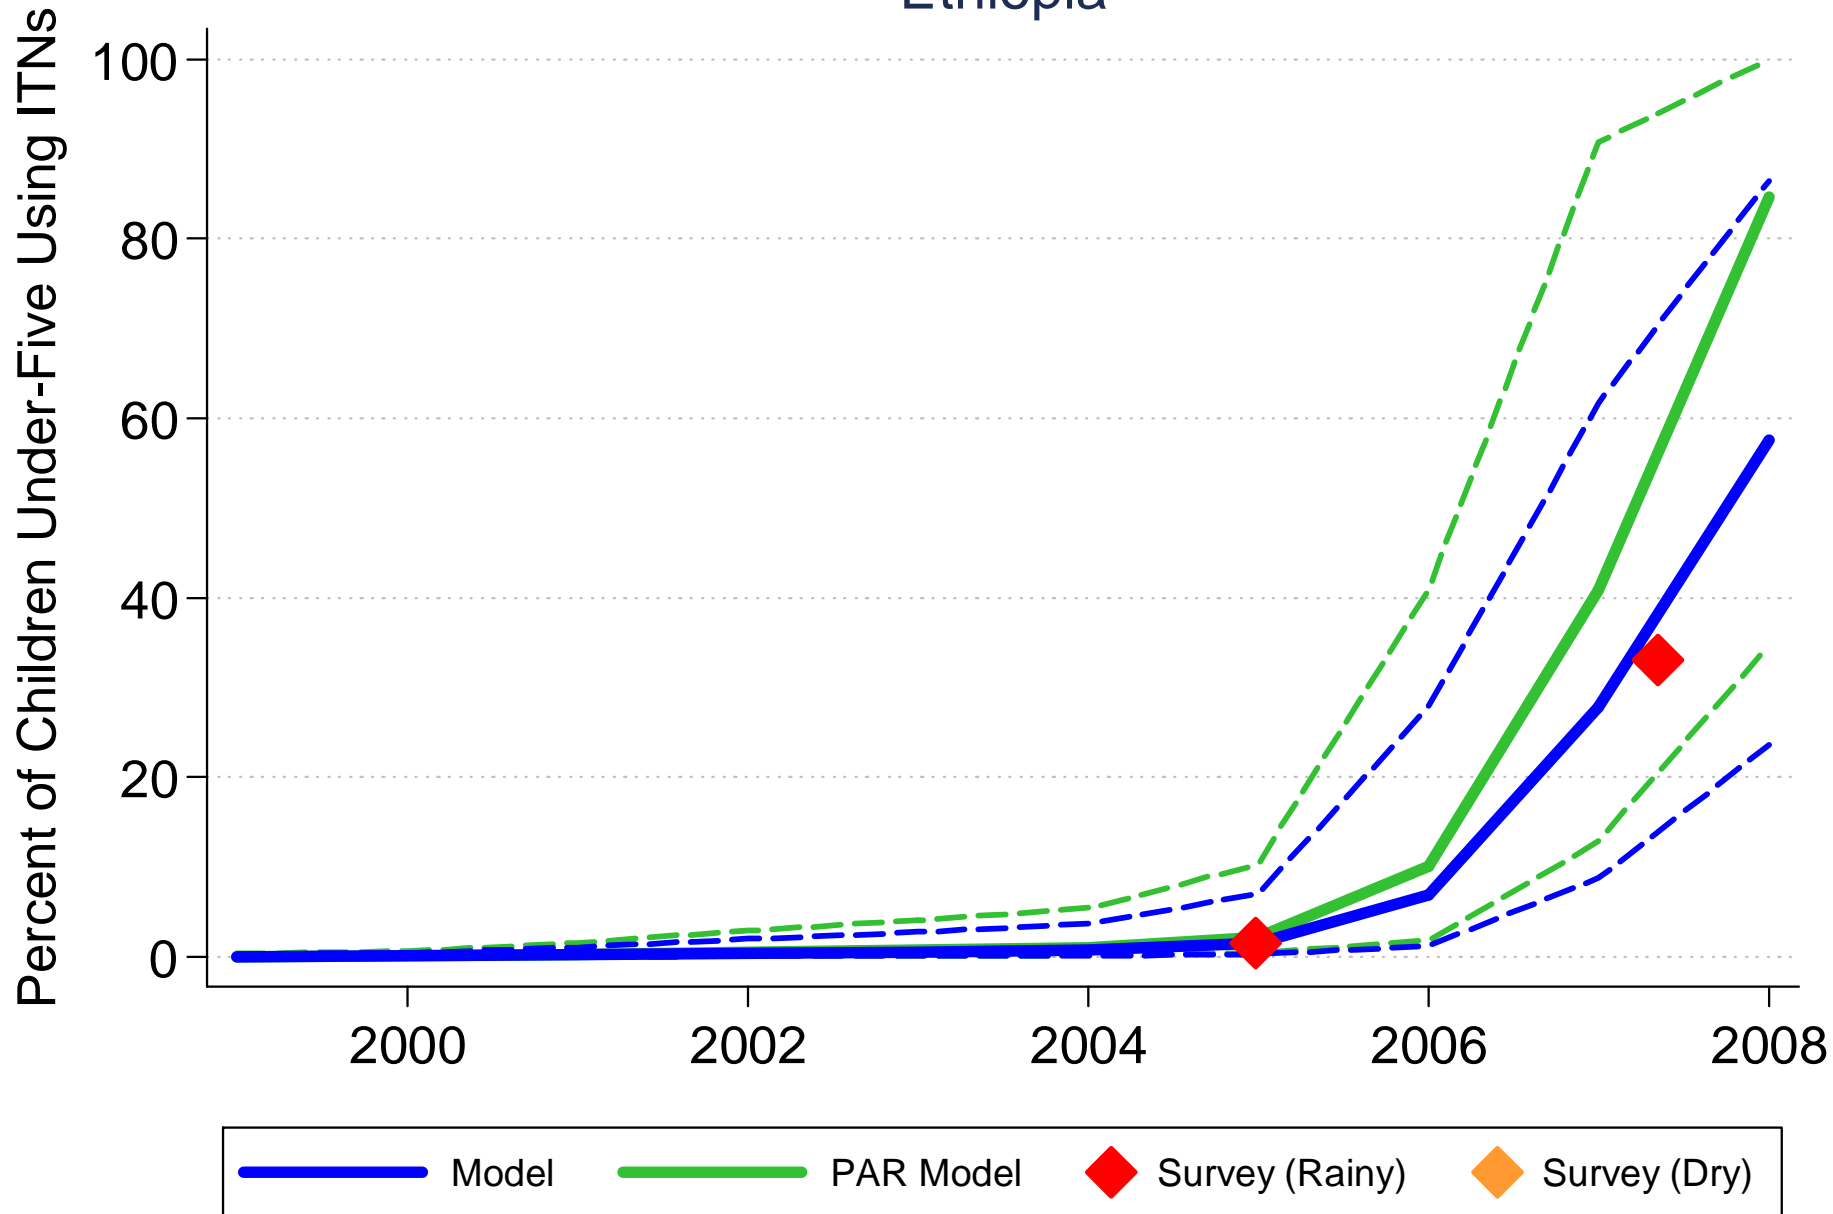

# Gabon

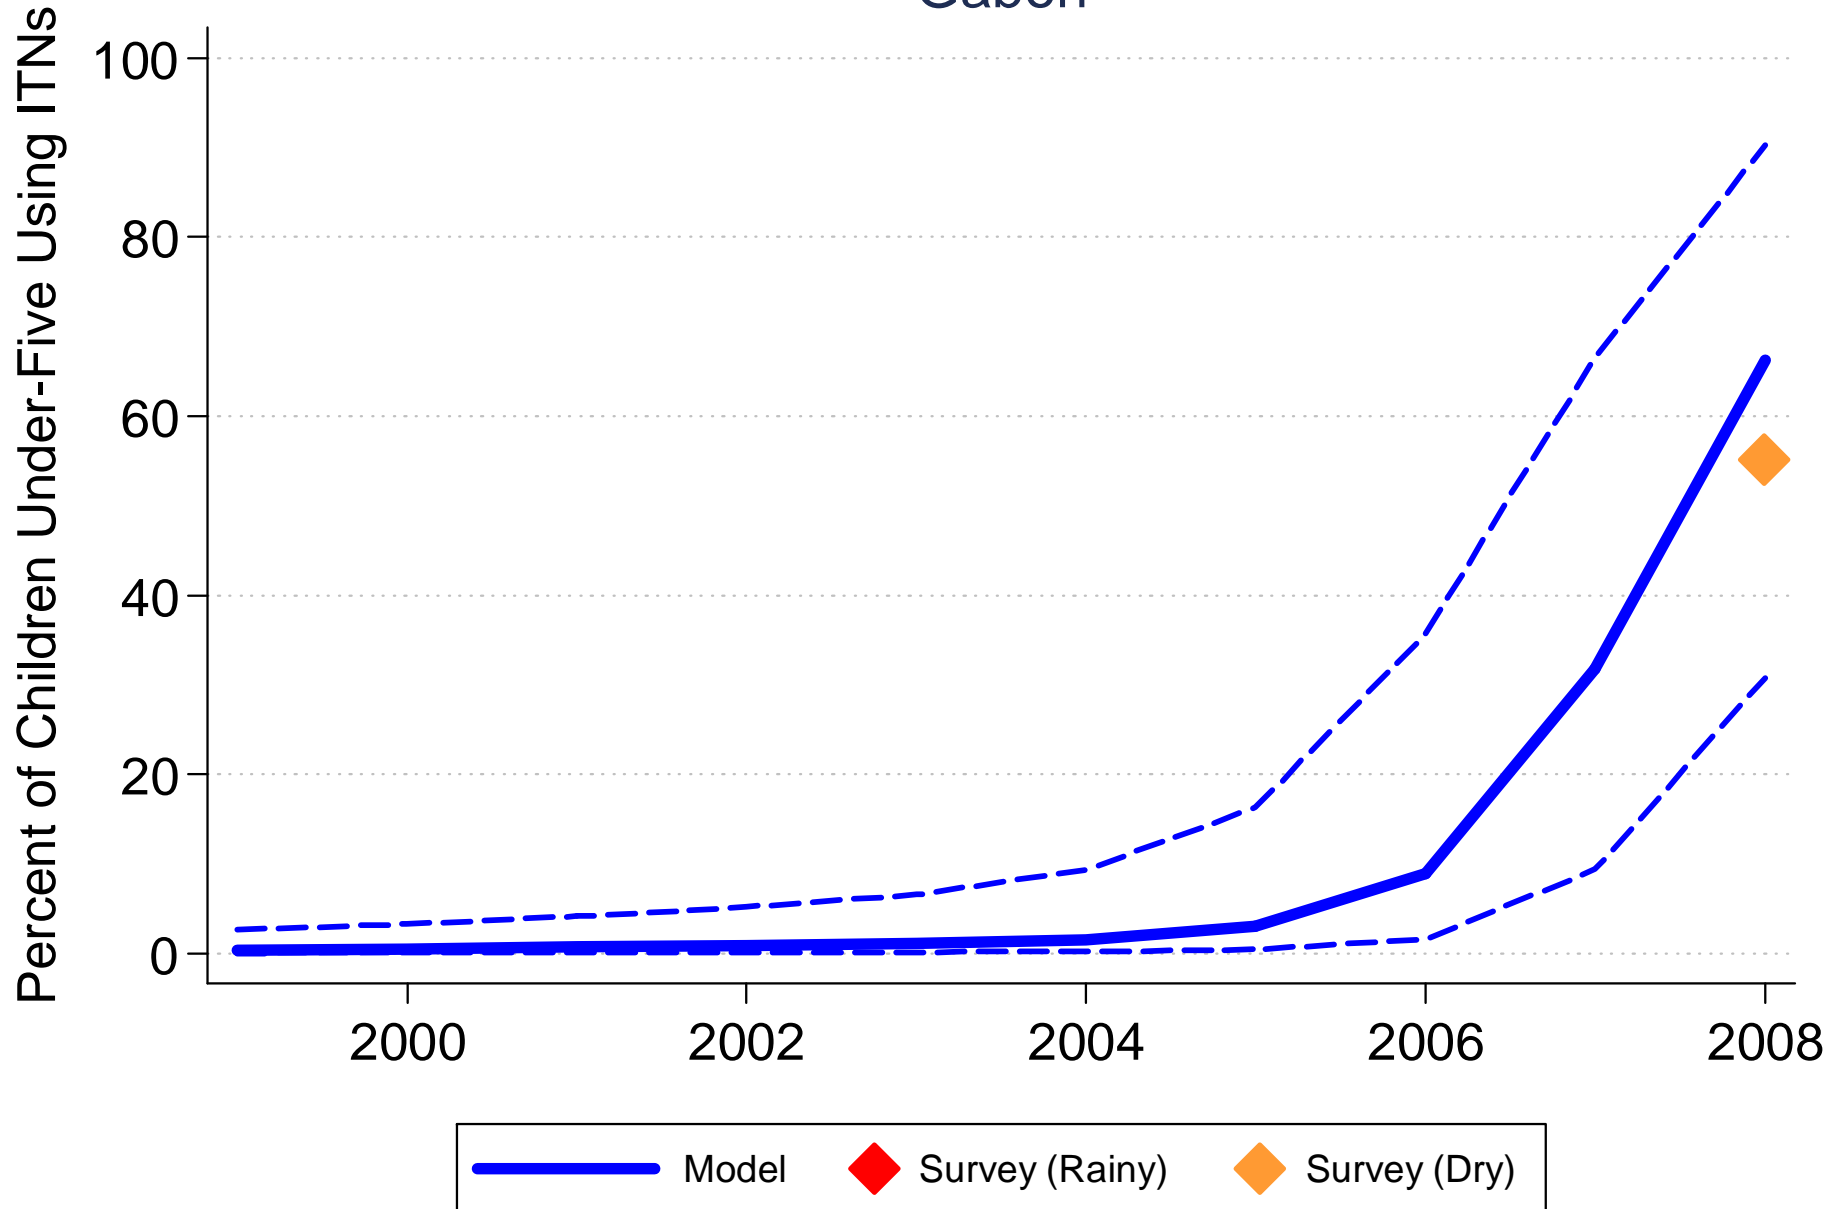

# Ghana

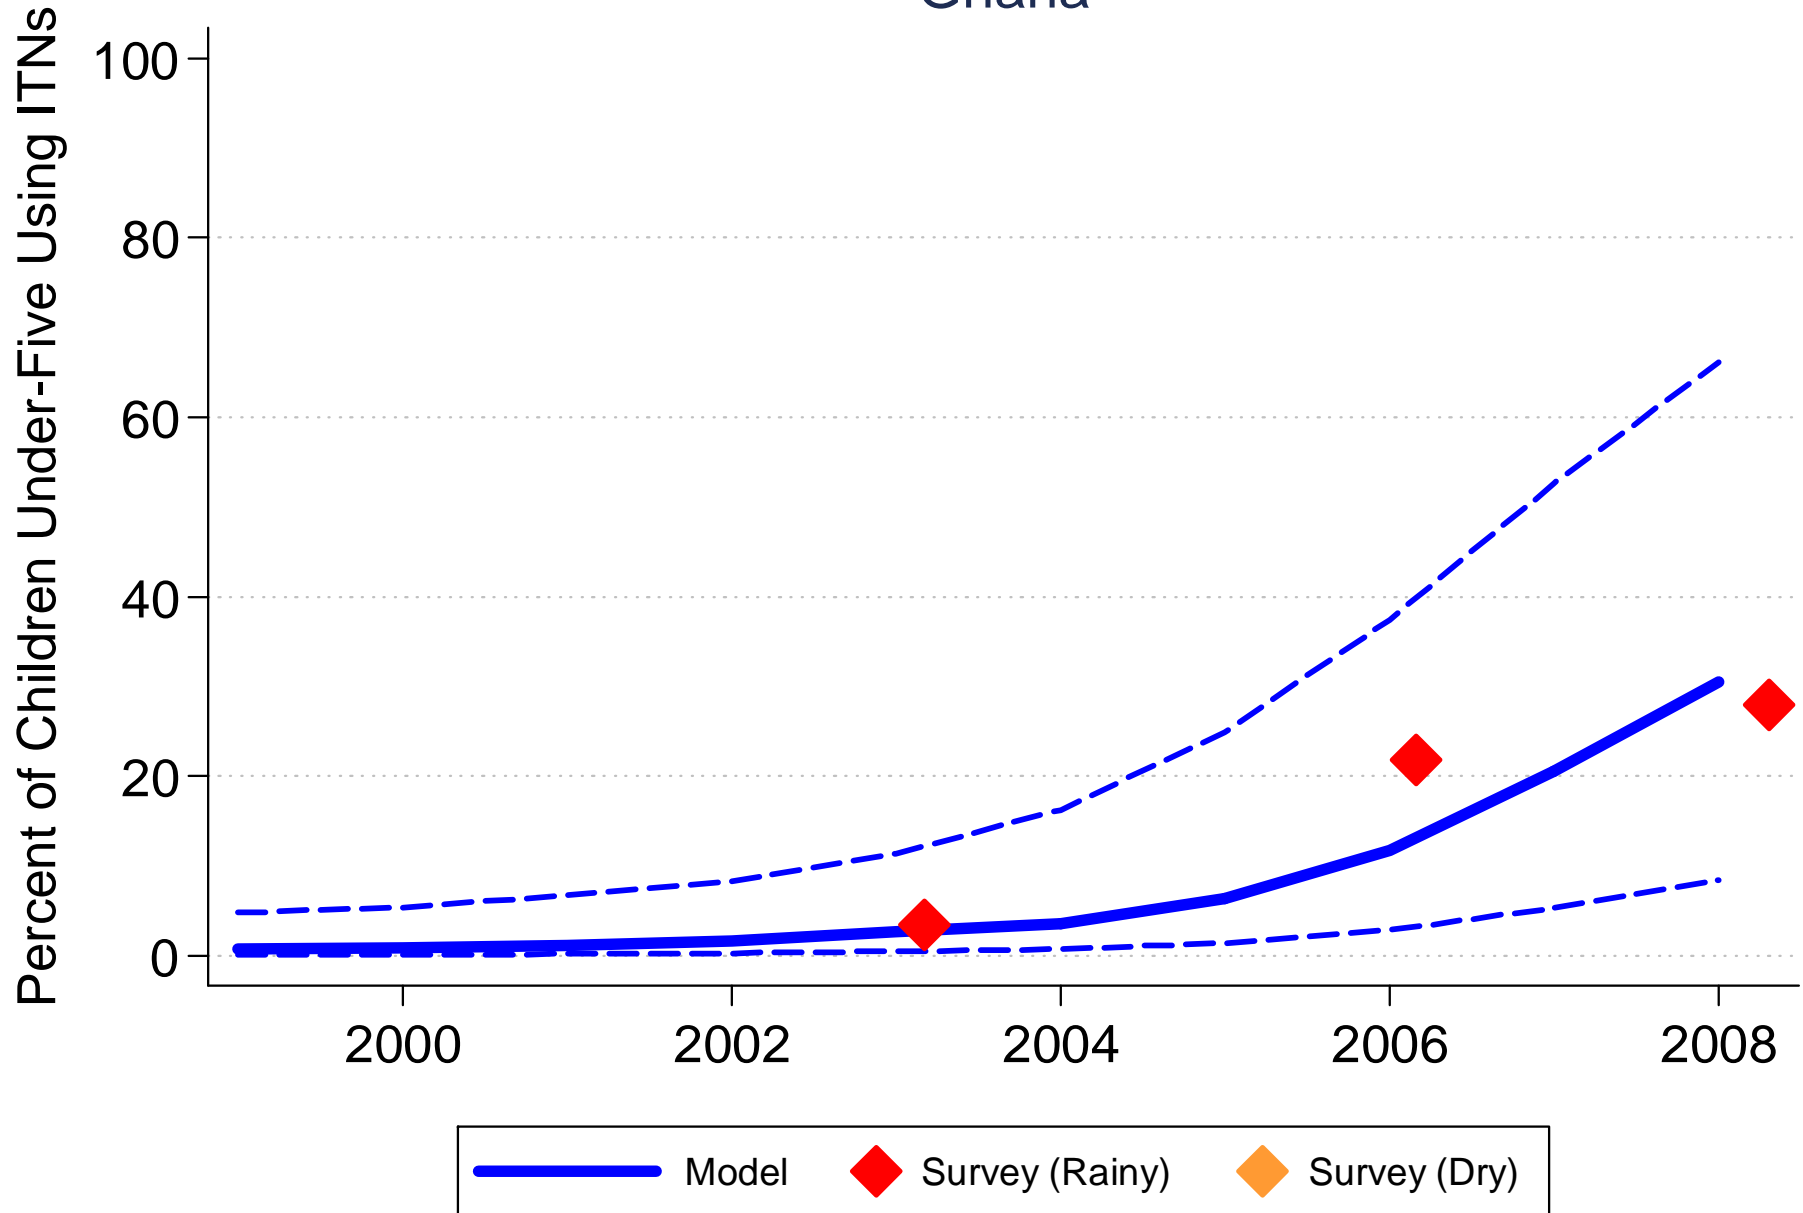

# Guinea

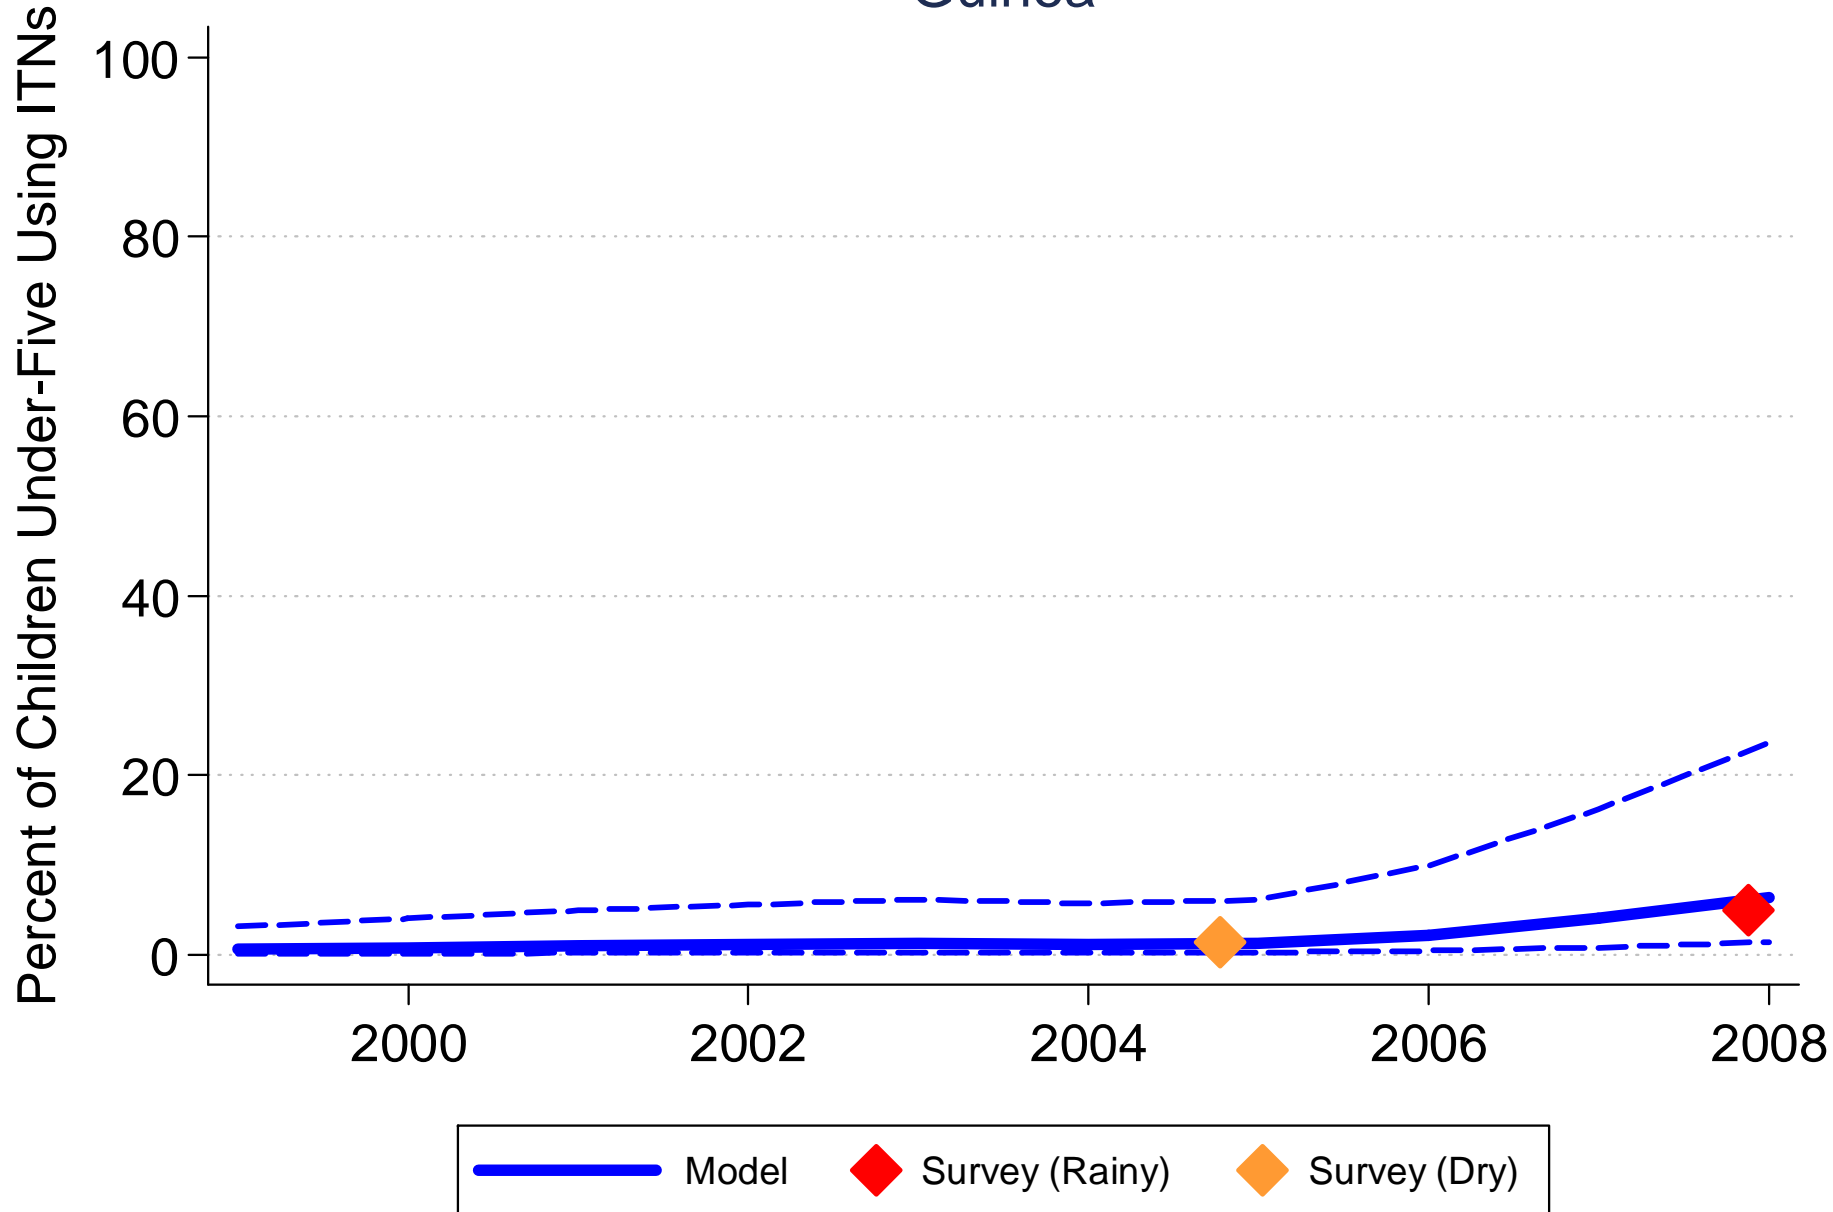

# Guinea-Bissau

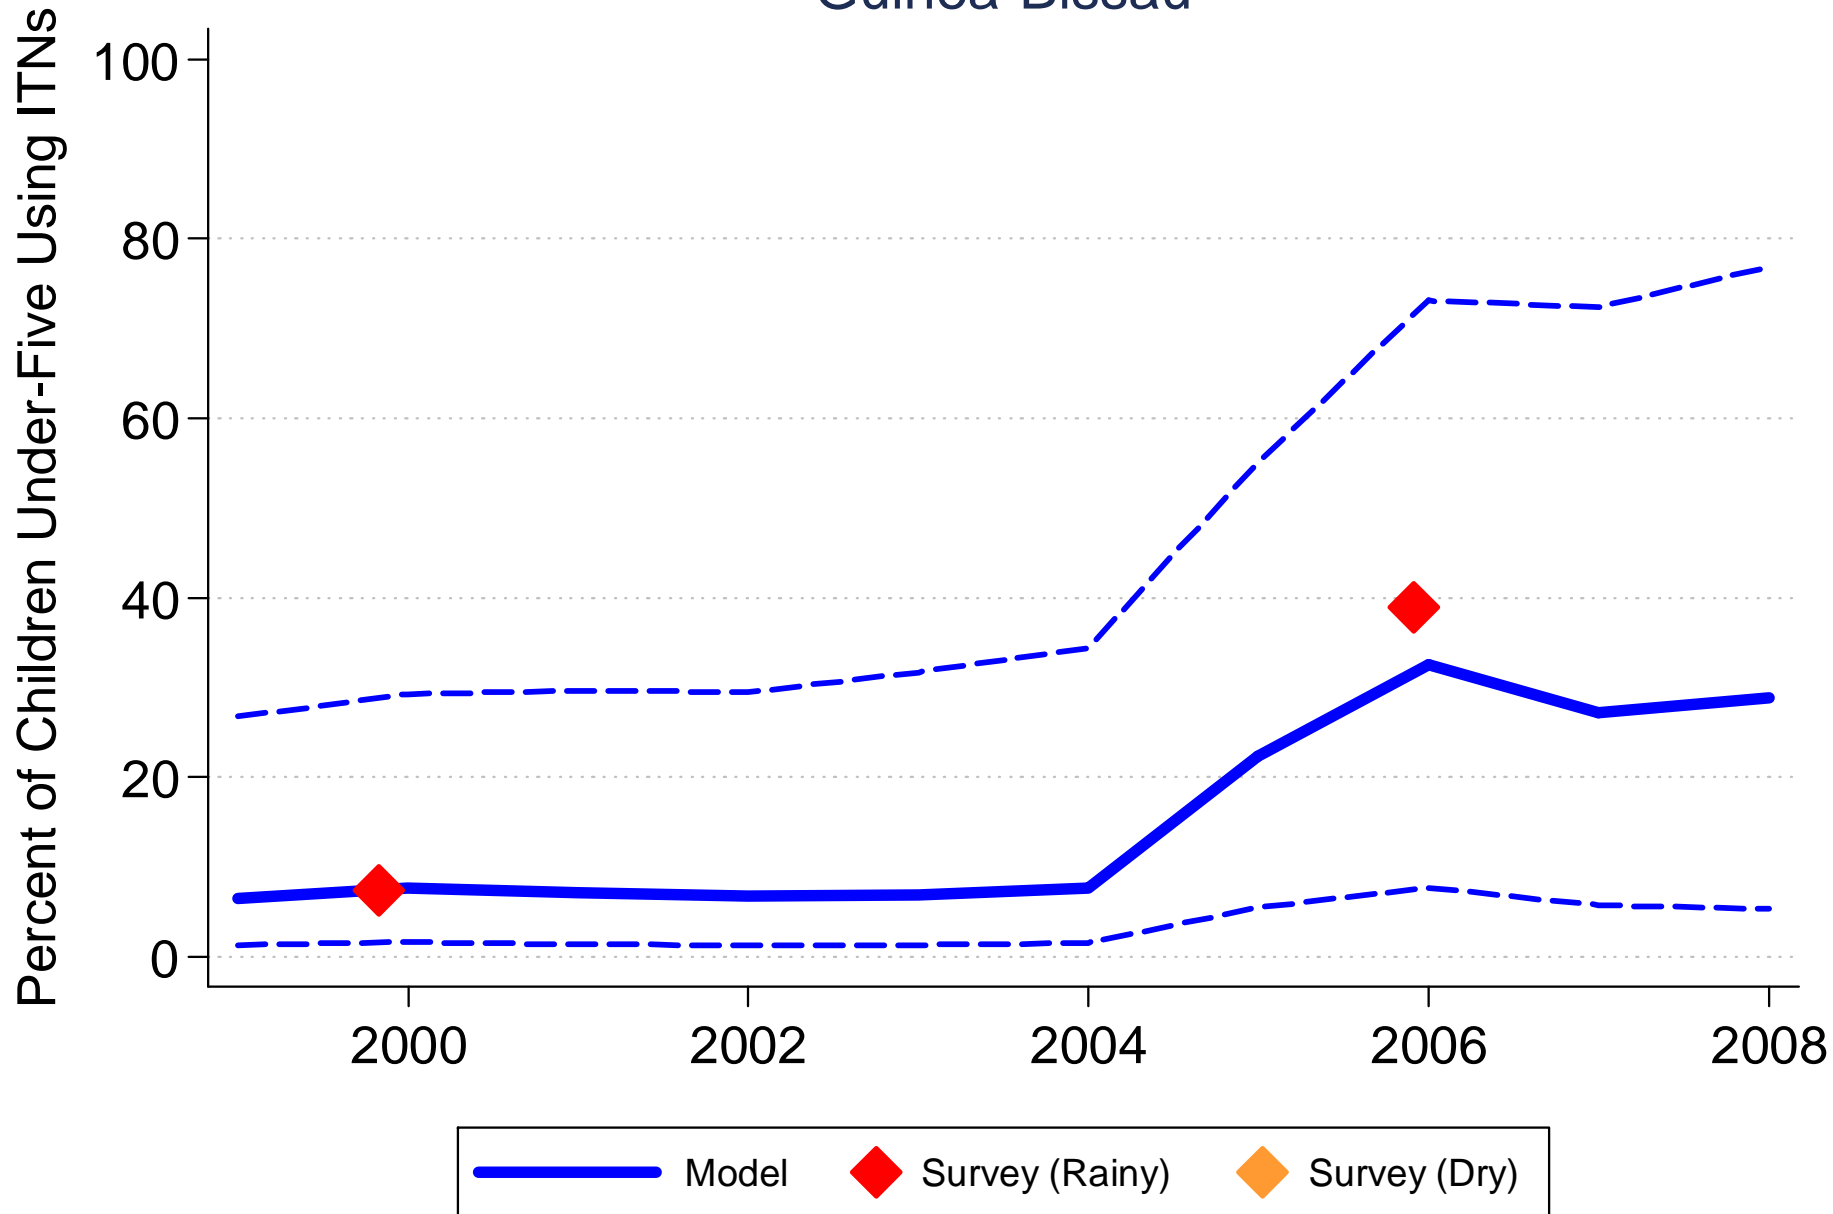

# Kenya

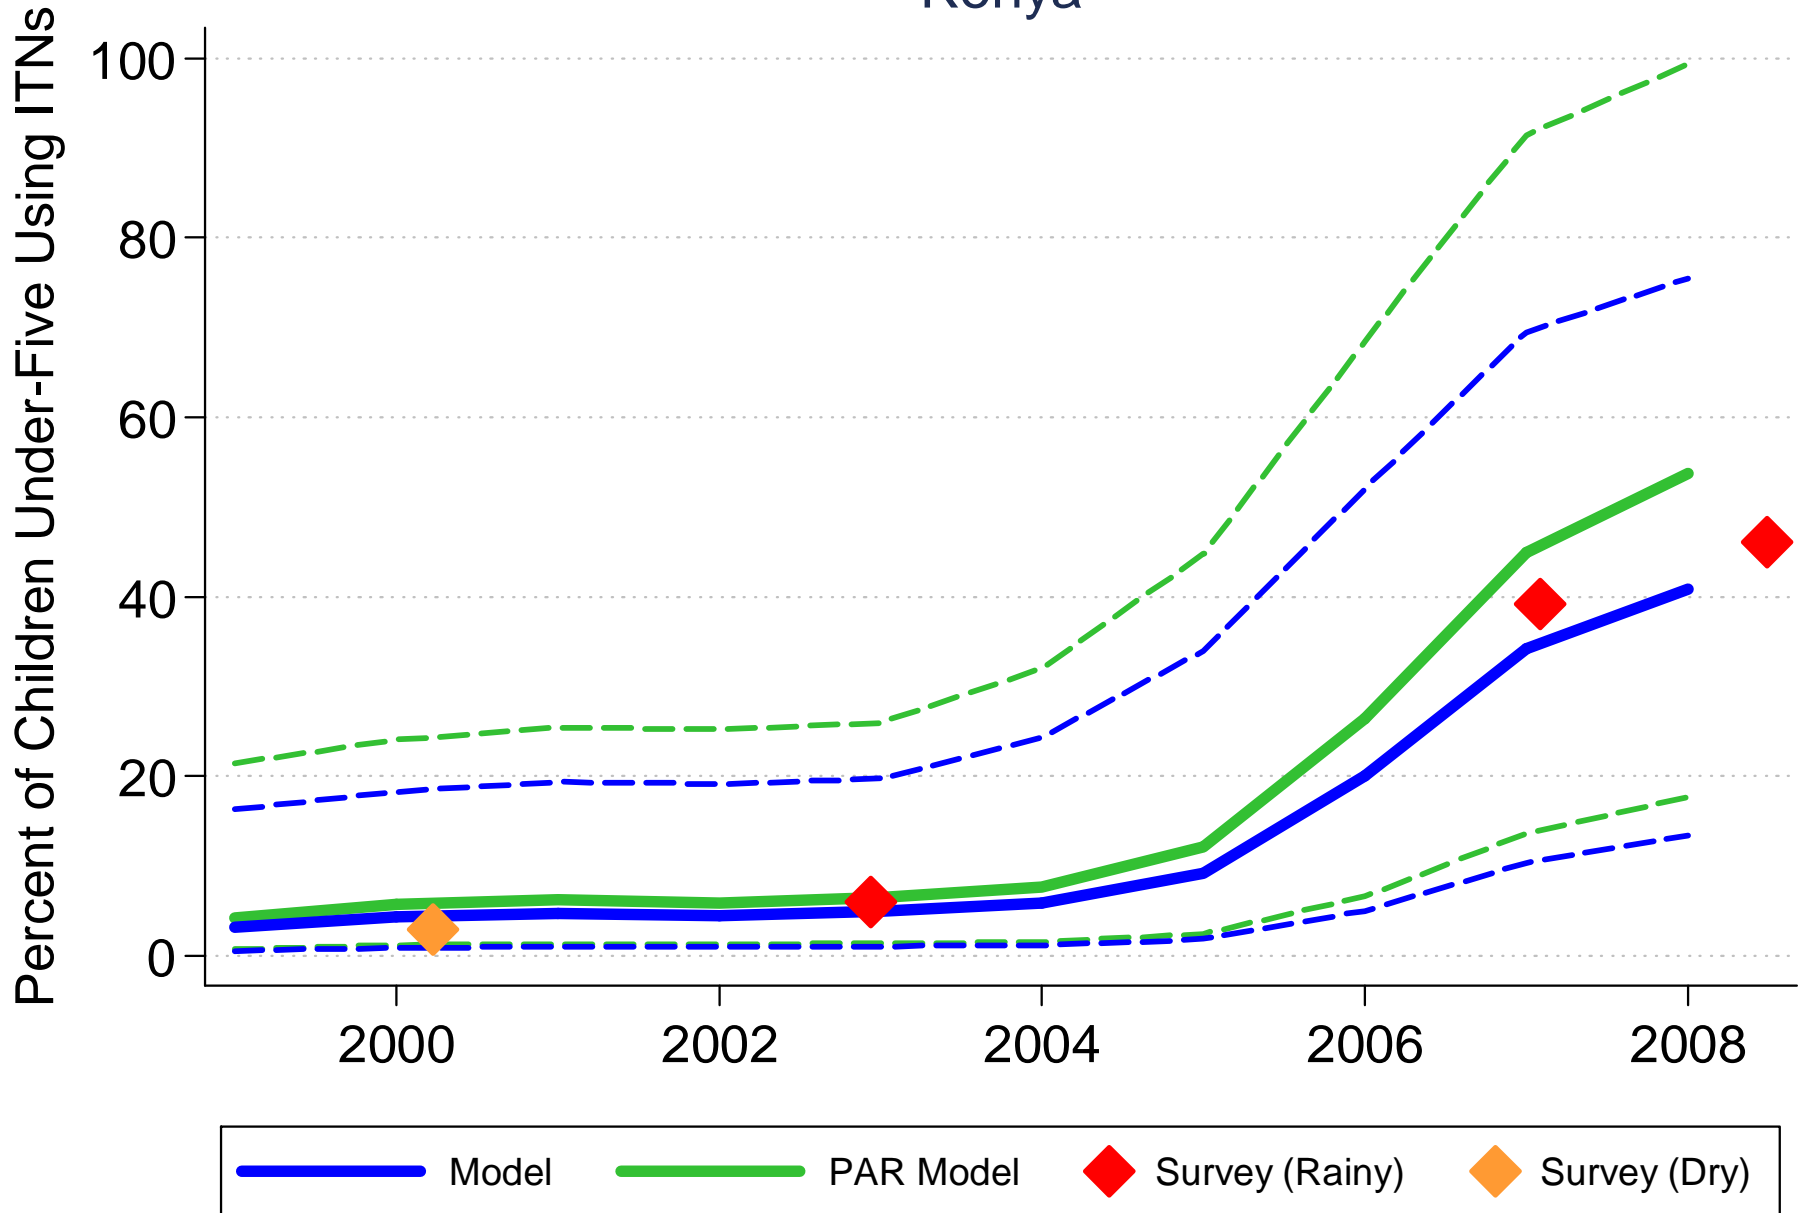

# Liberia

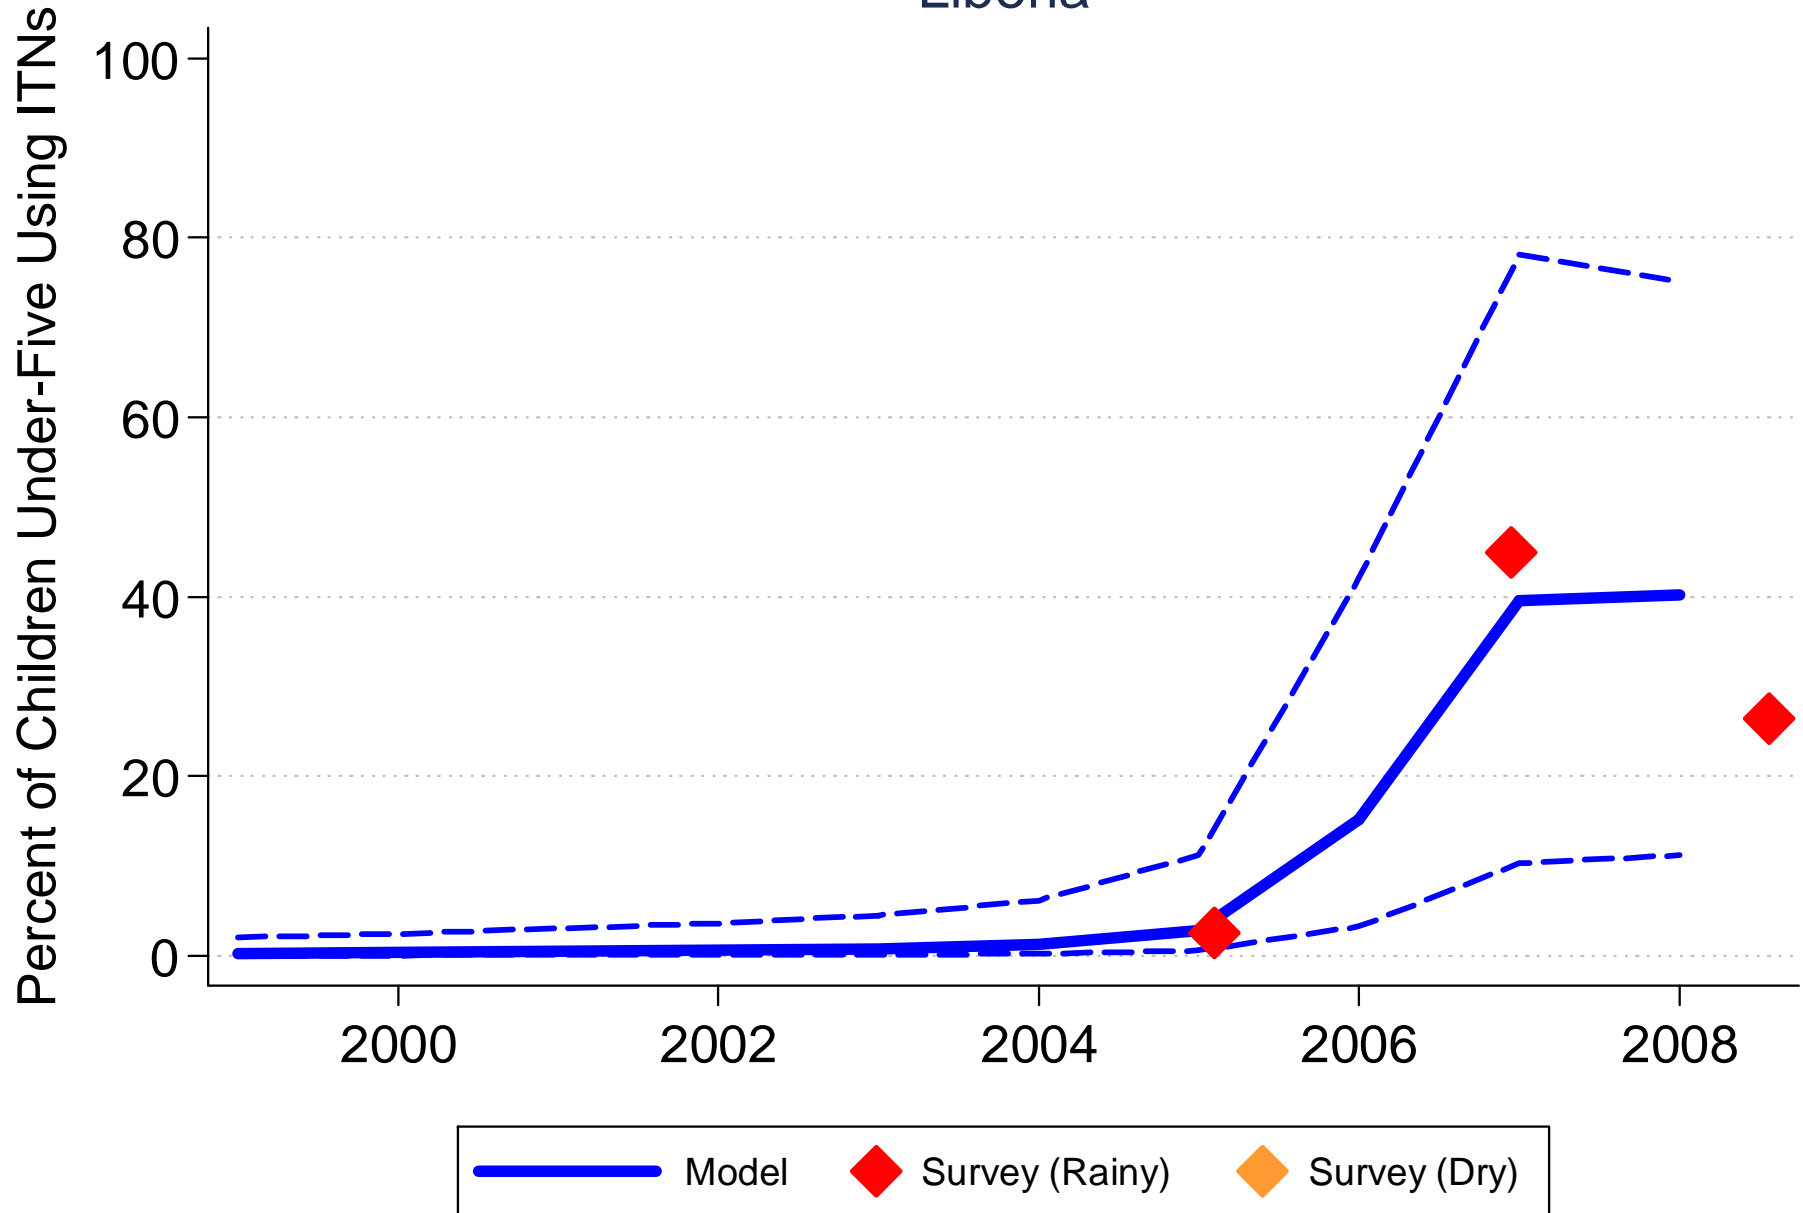

# Madagascar

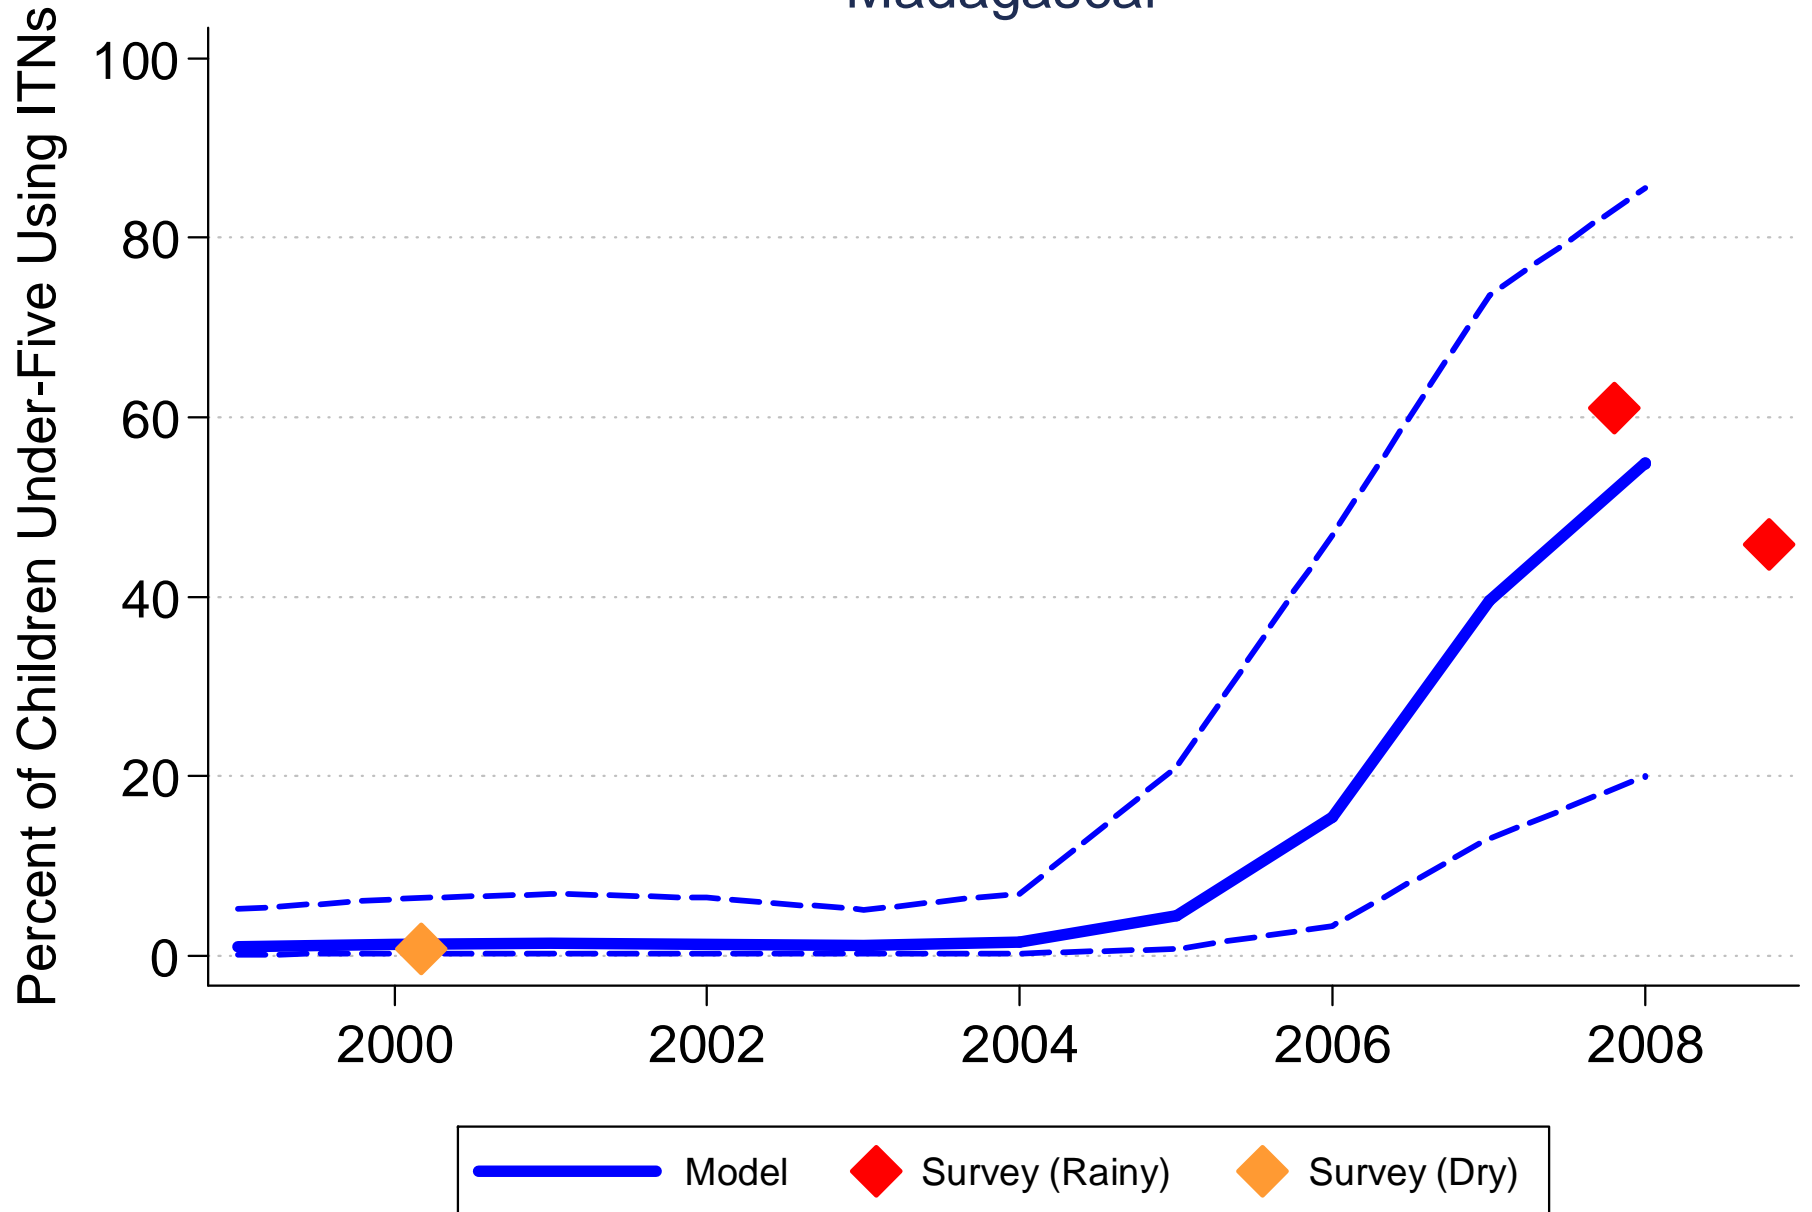



# Malawi

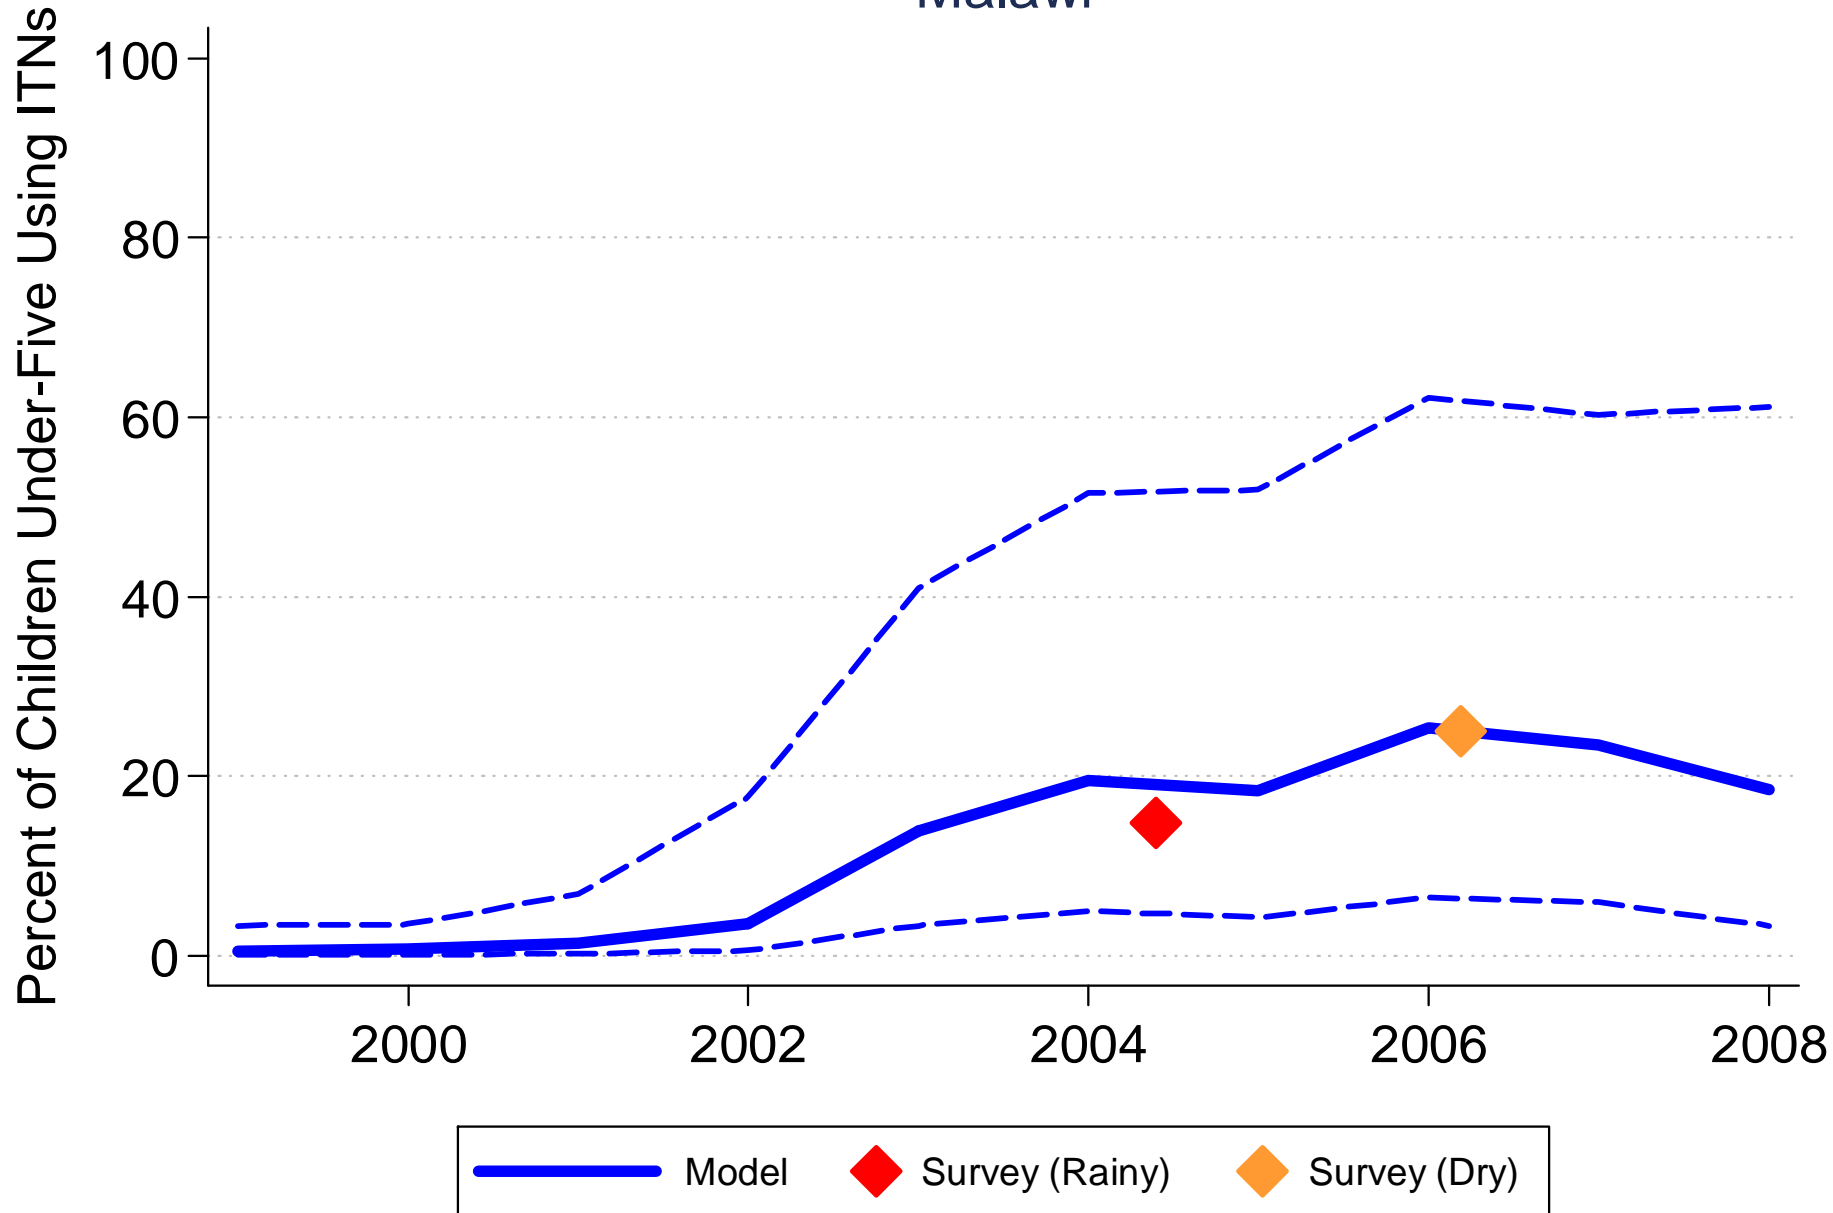

# Mali

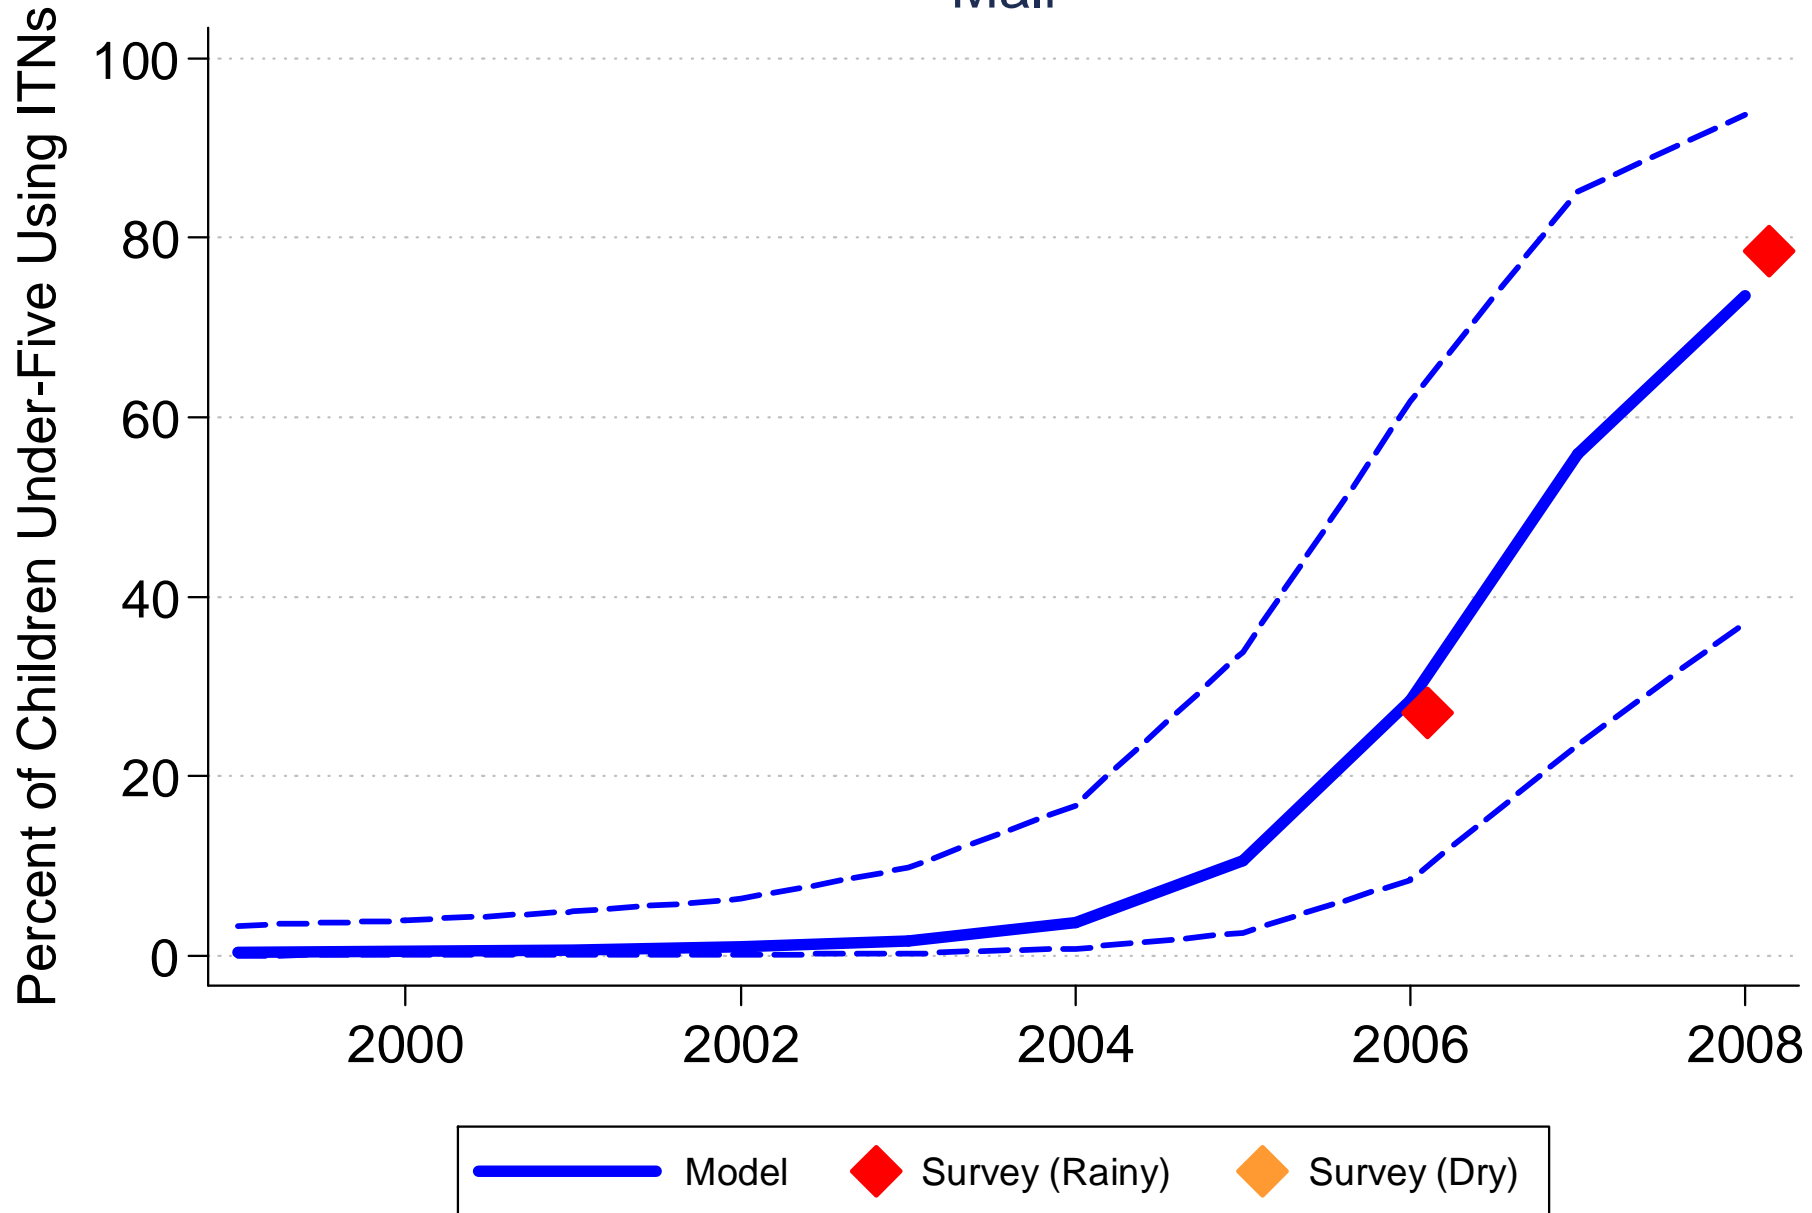

# Mauritania

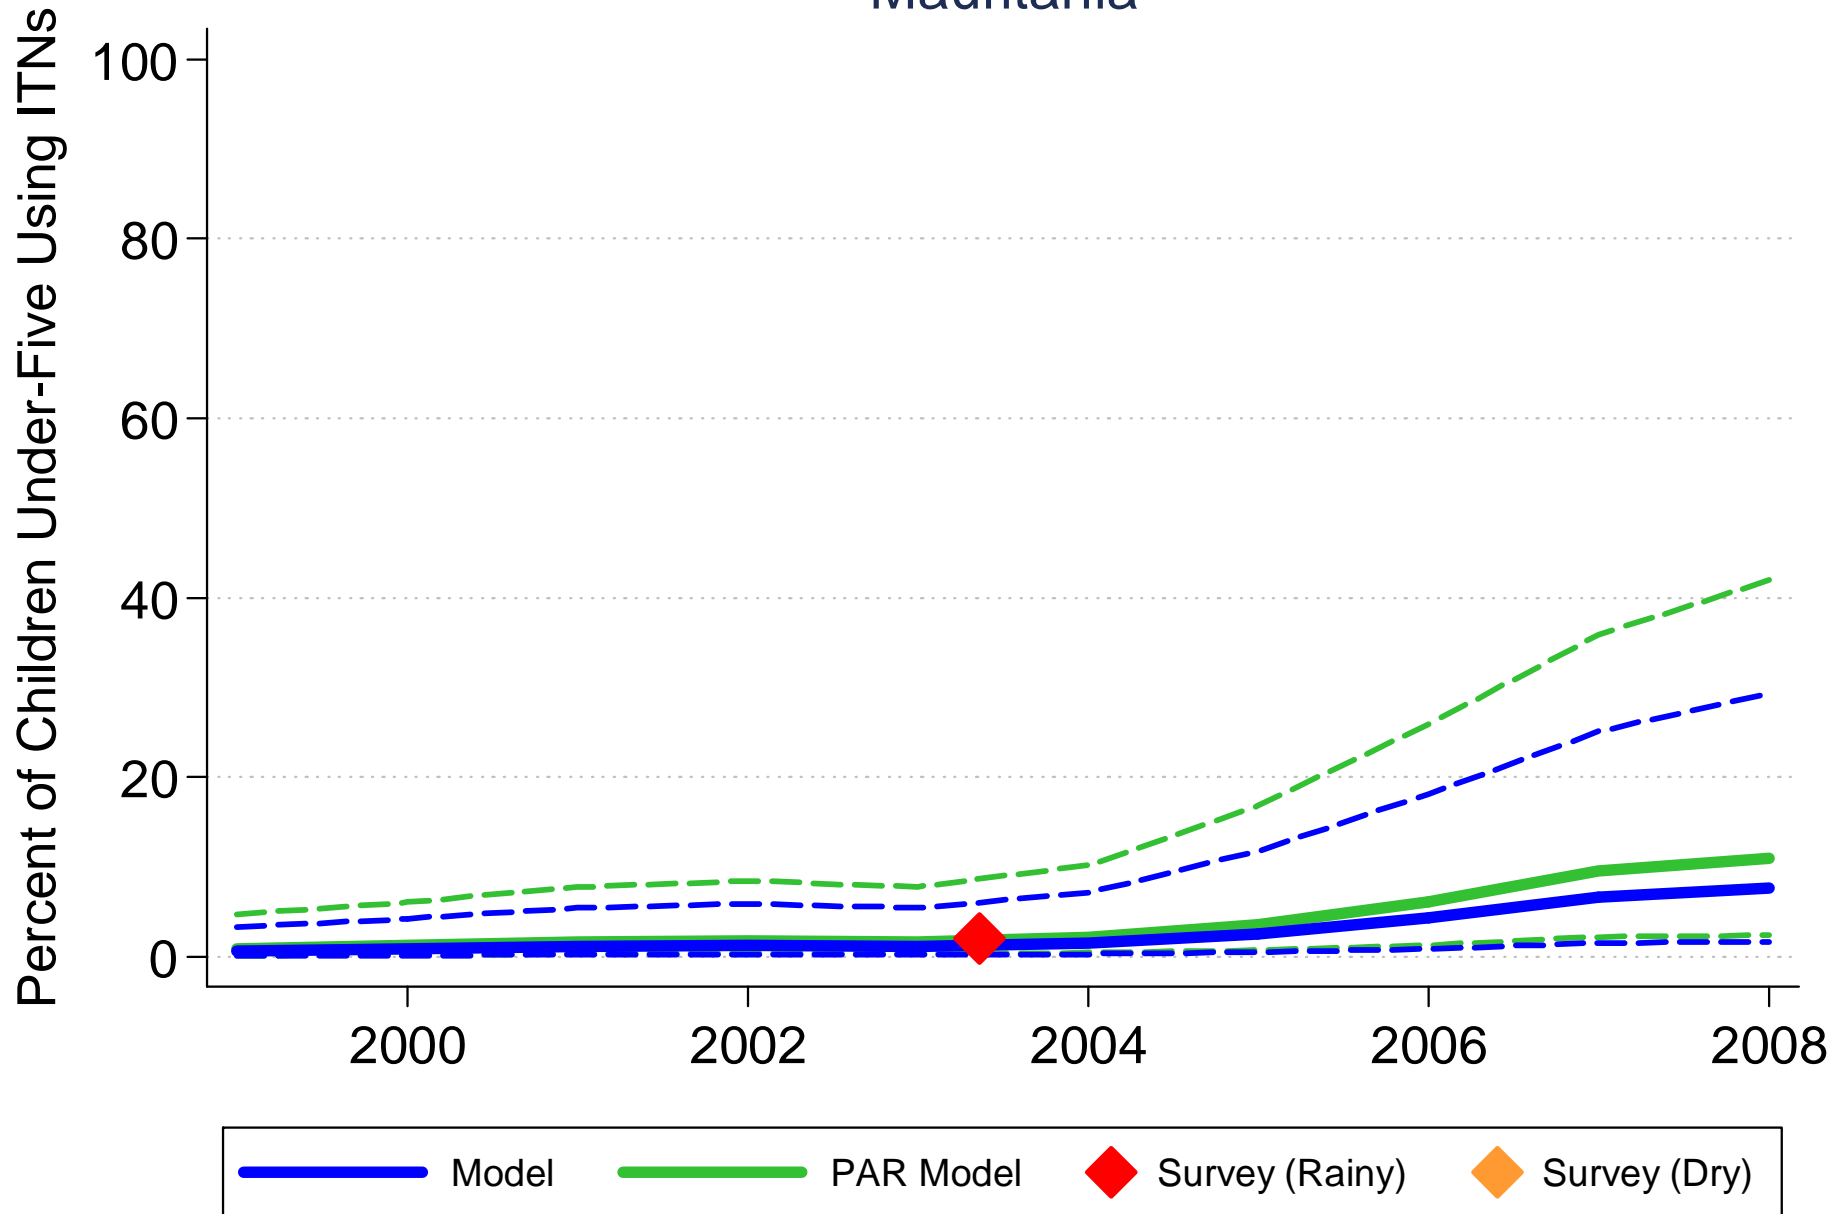

# Mozambique

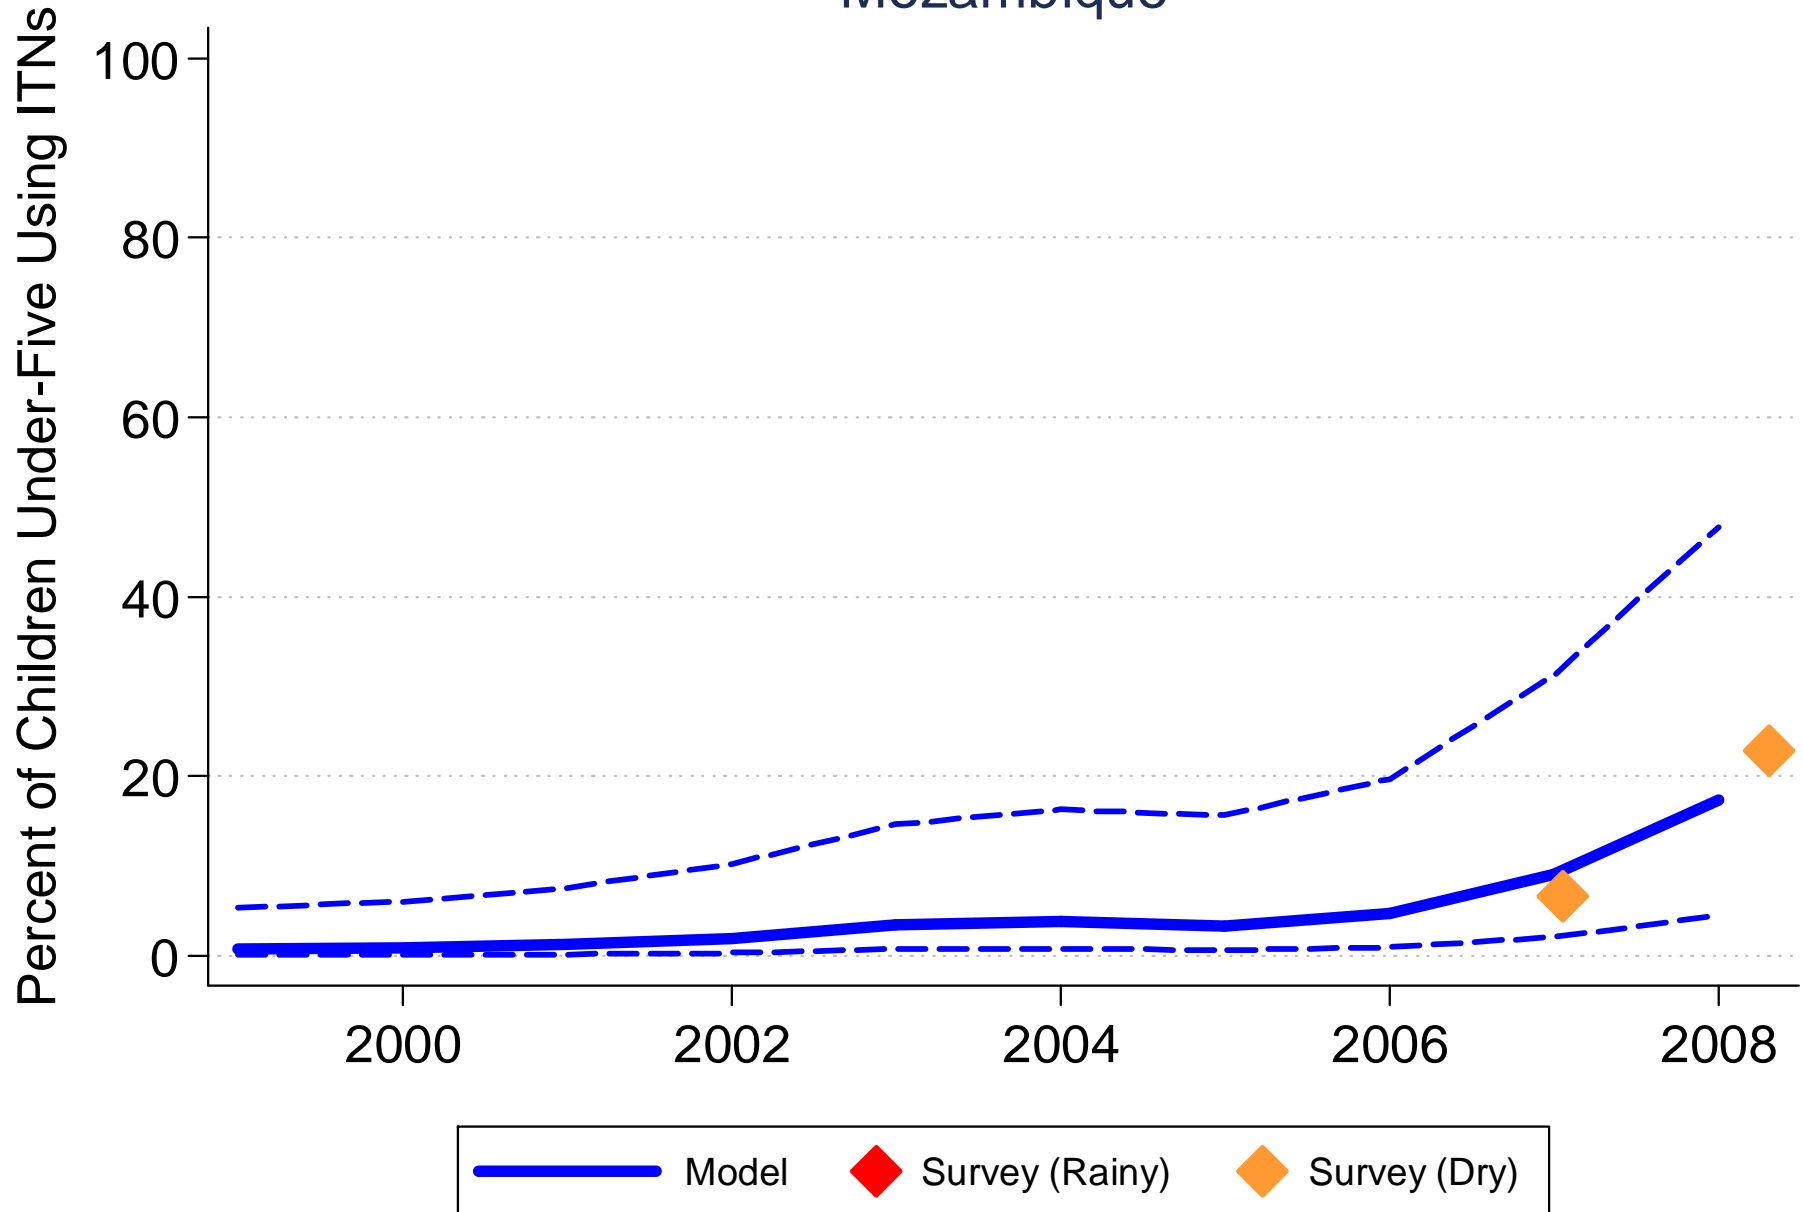

# Namibia

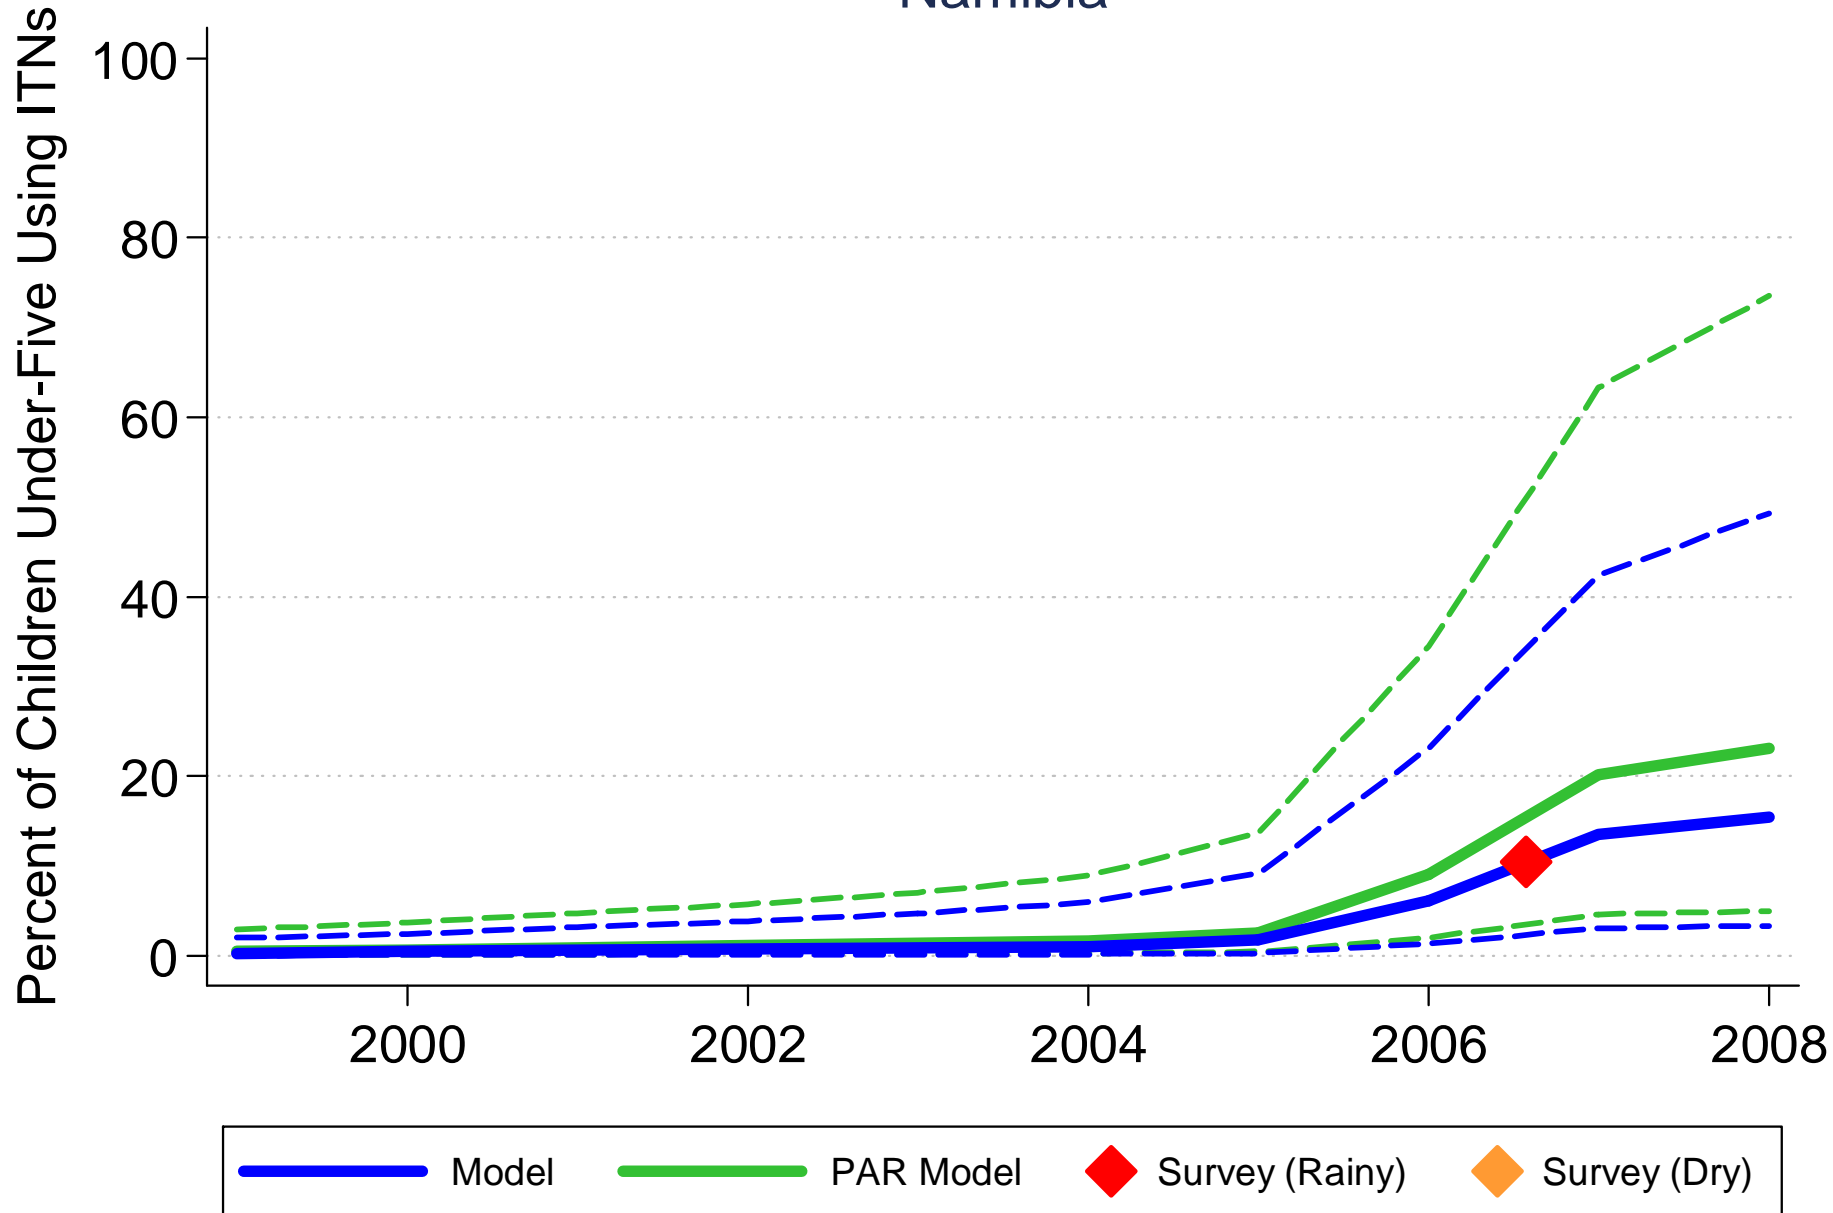

# Niger

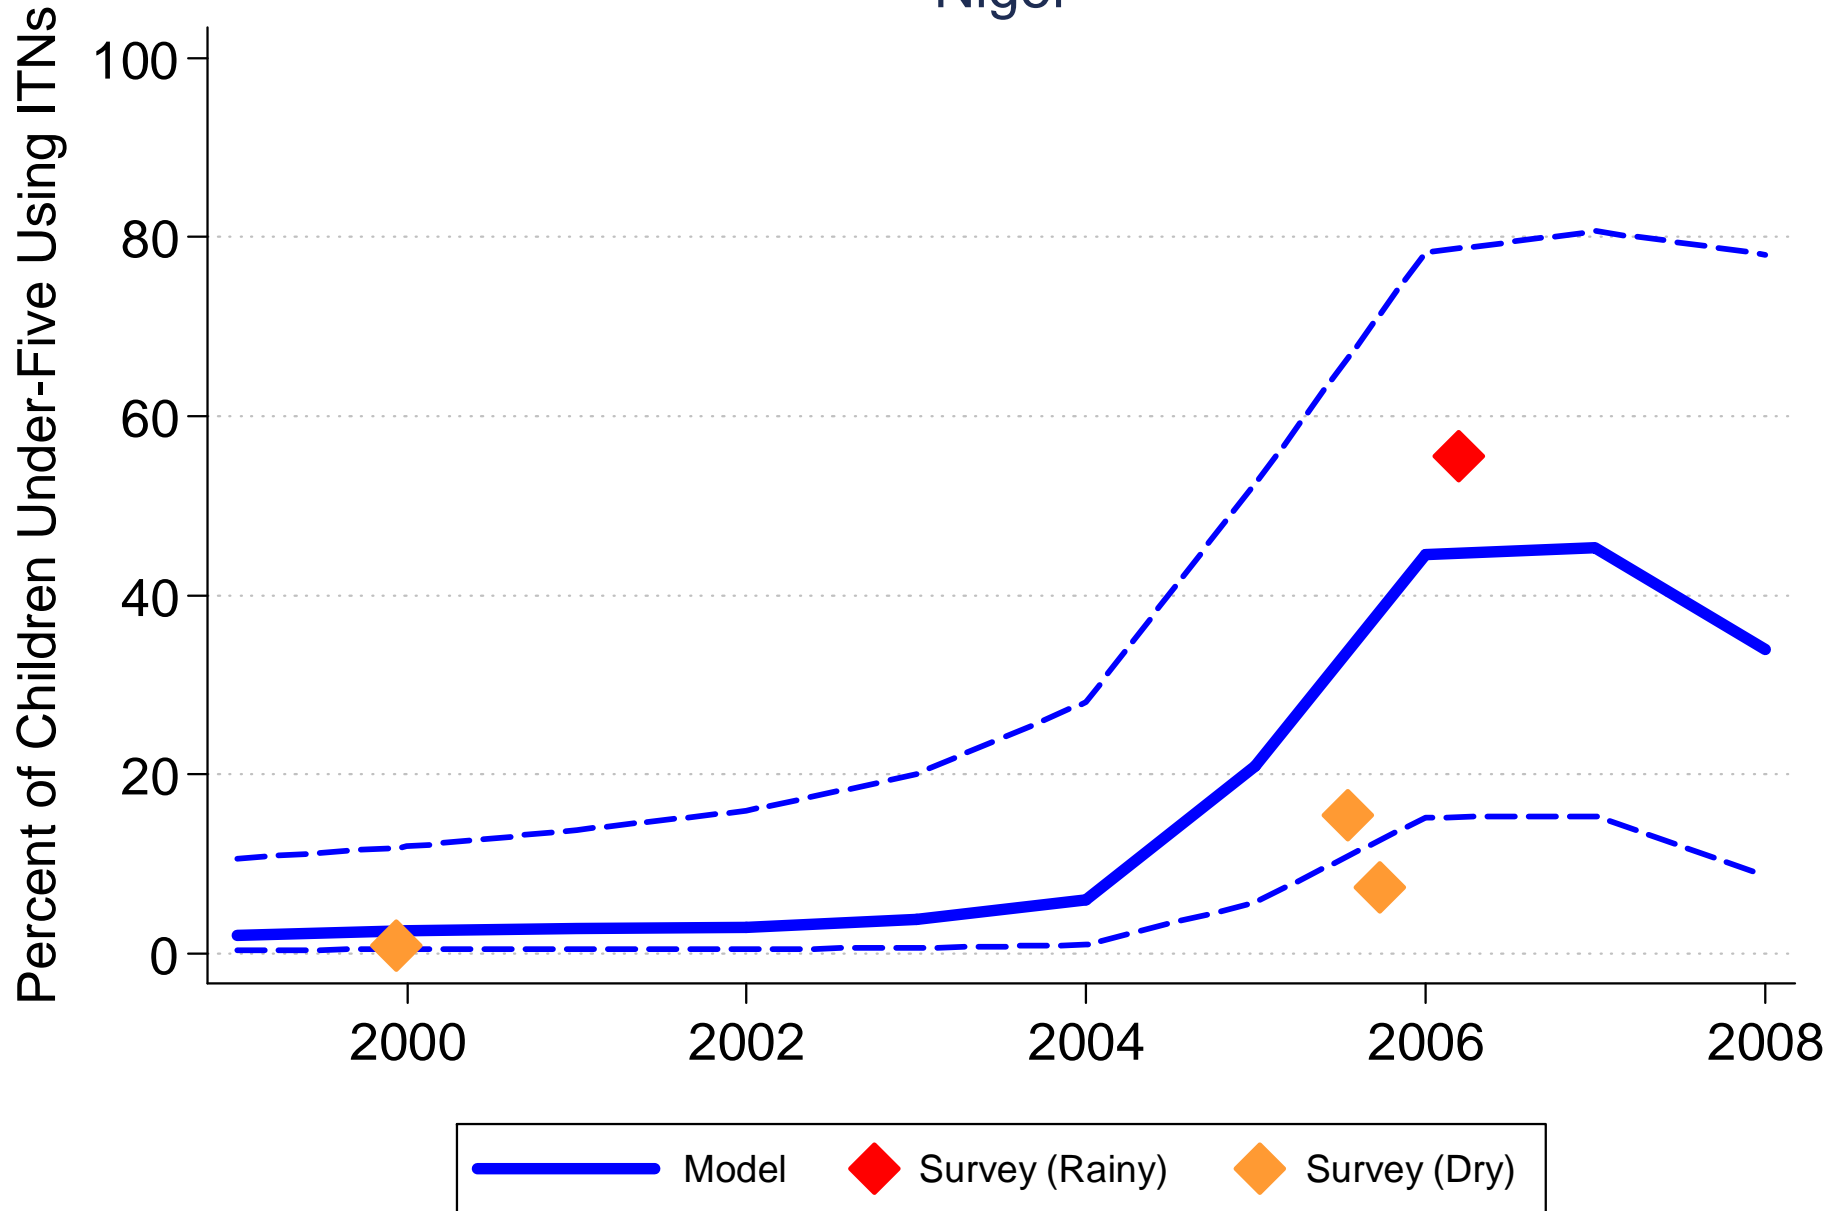

# Nigeria

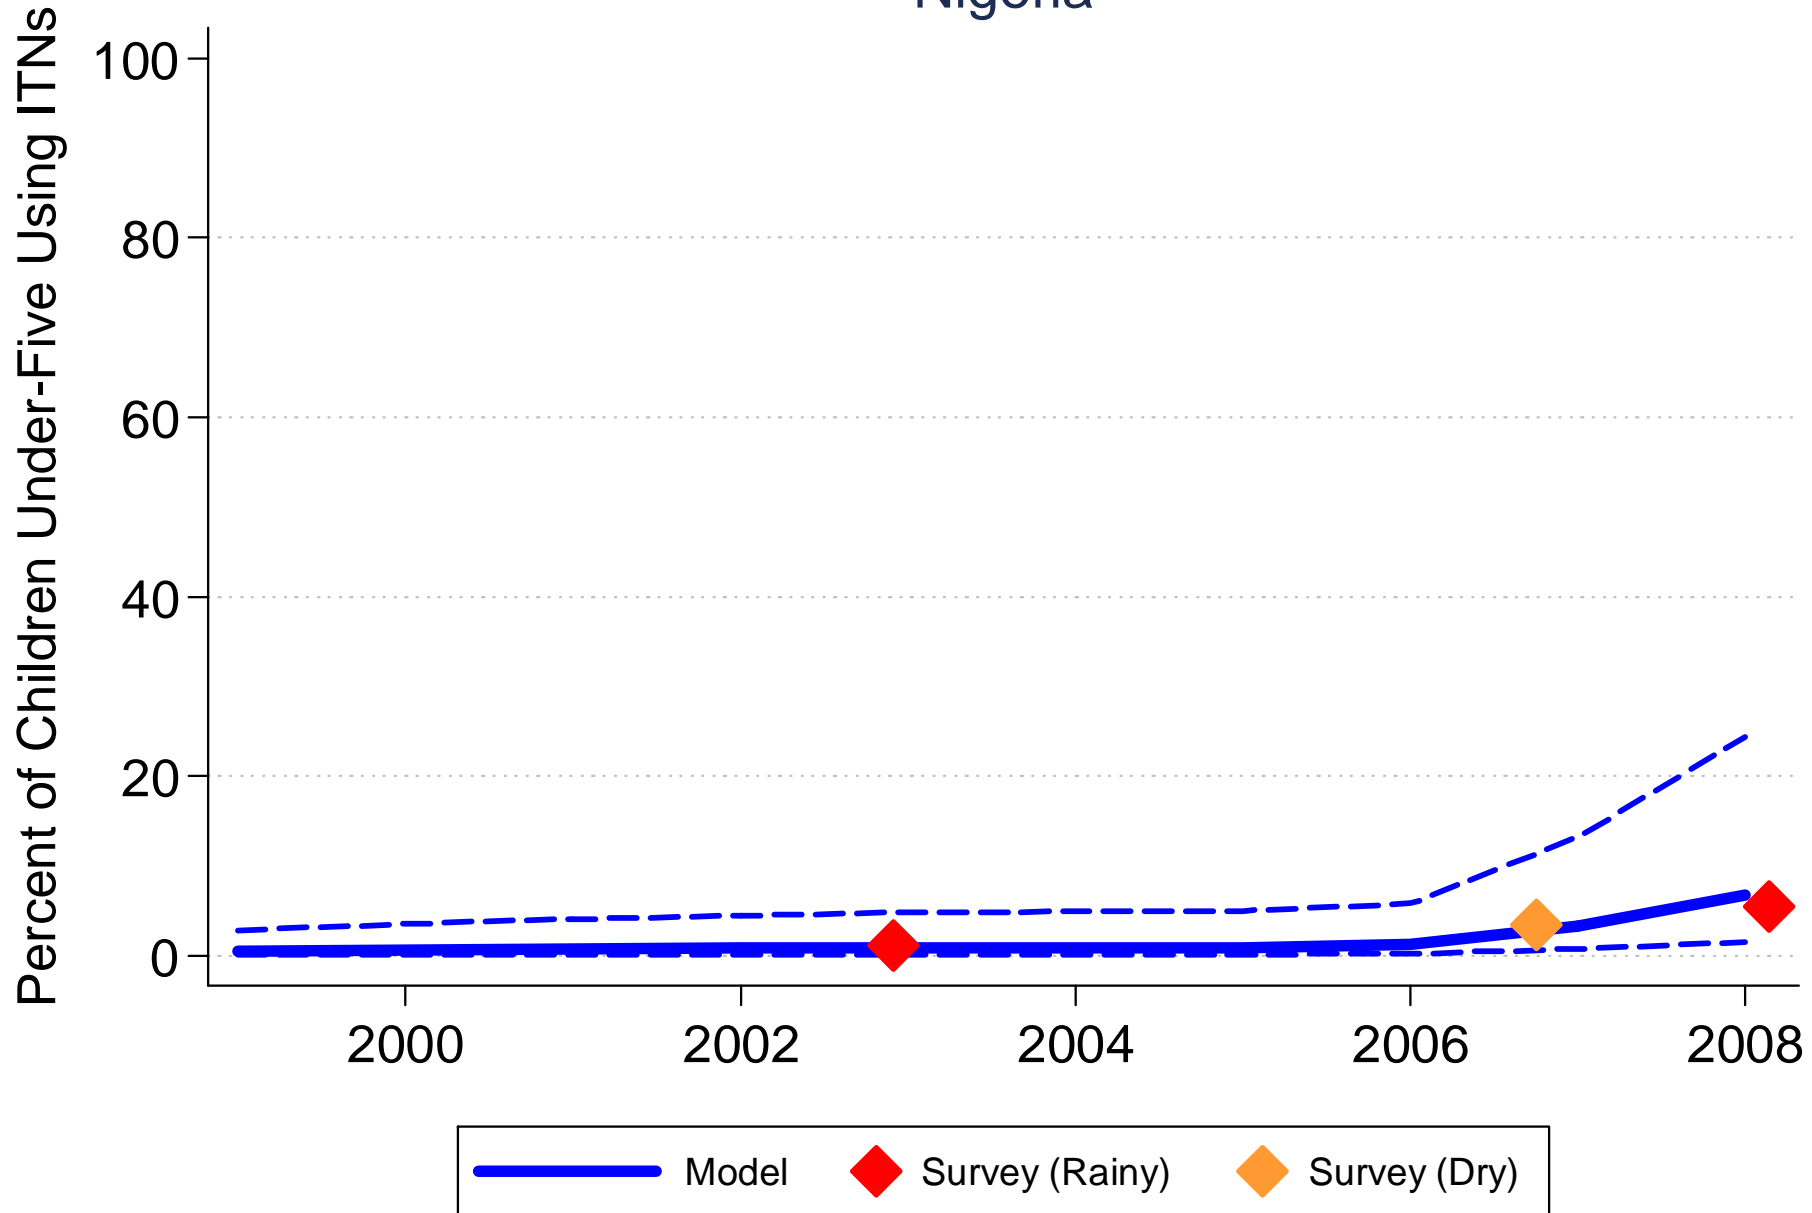

# Rwanda

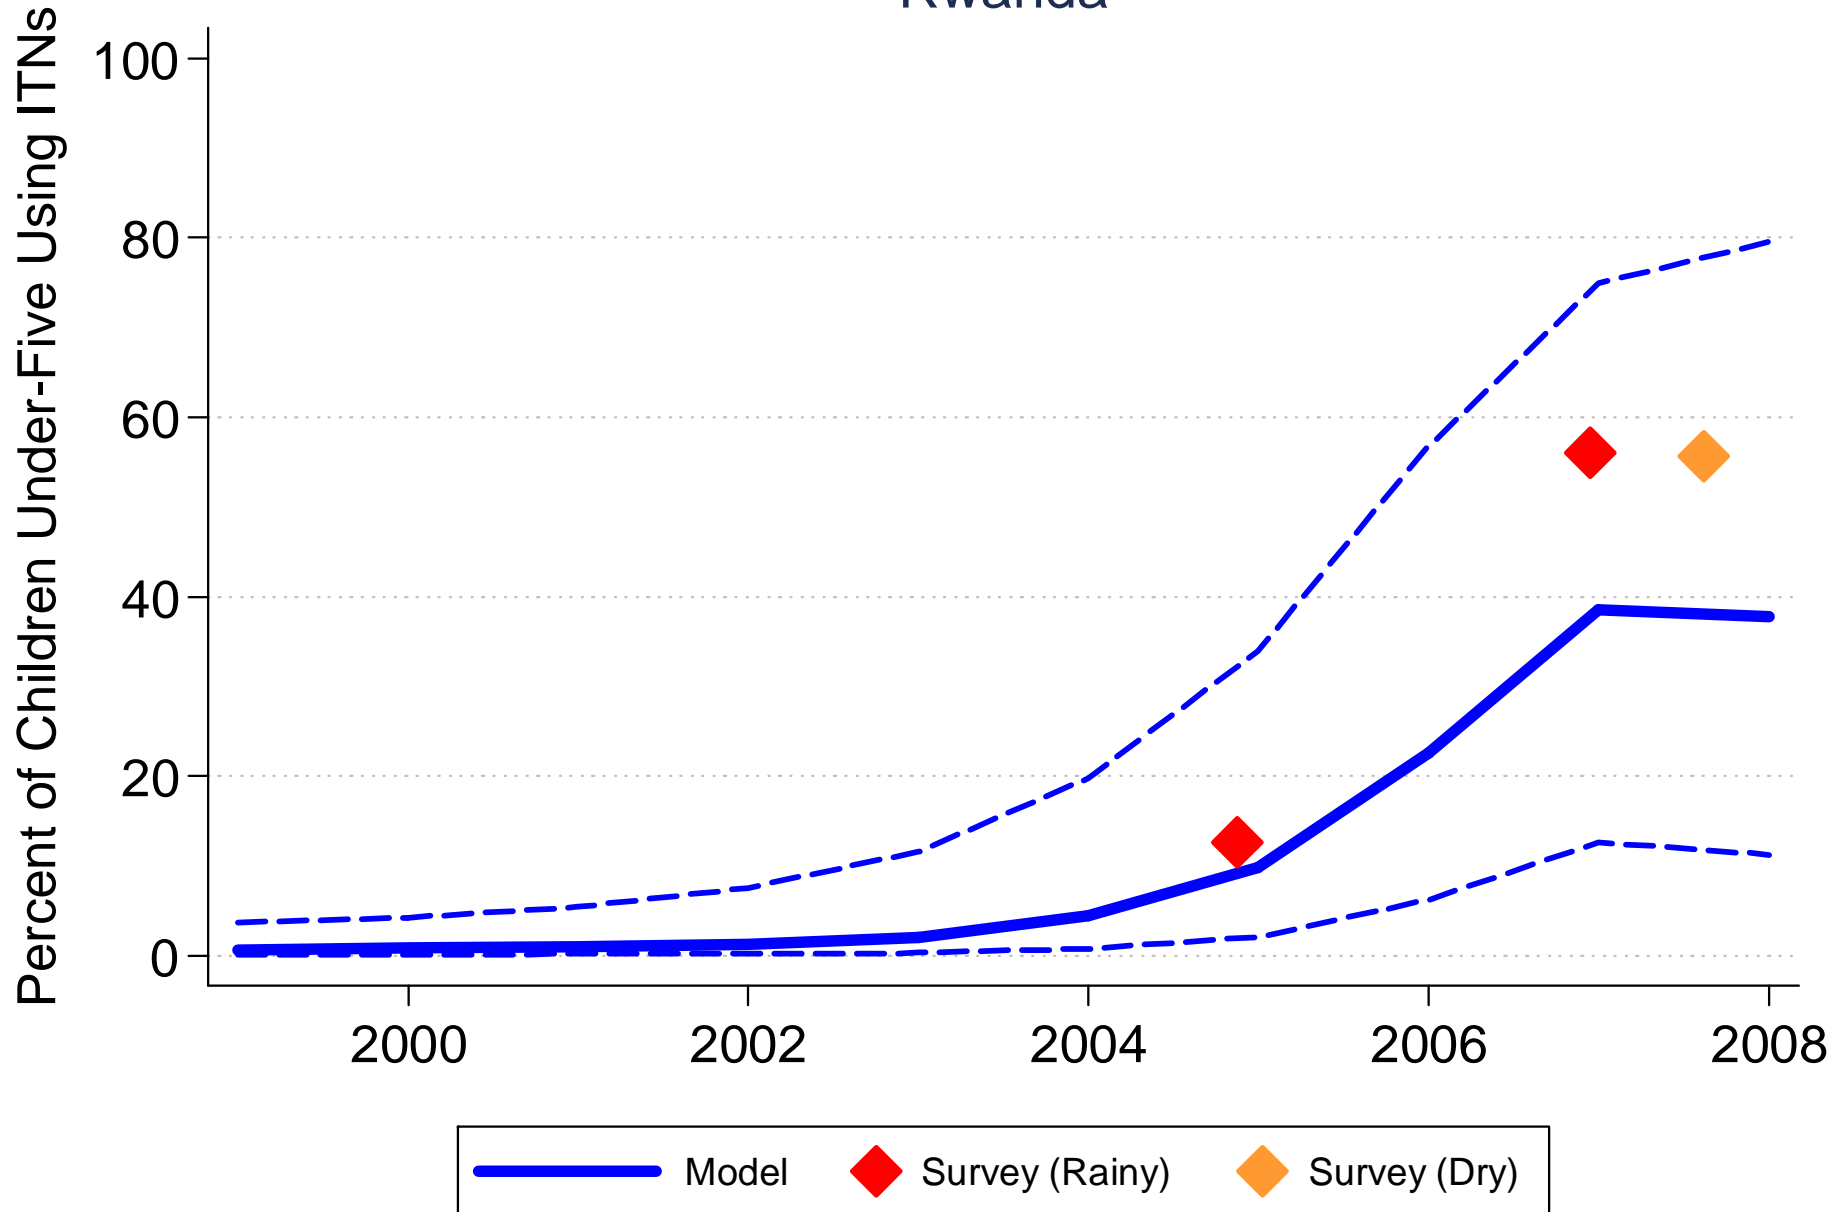



# SaoTome & Principe

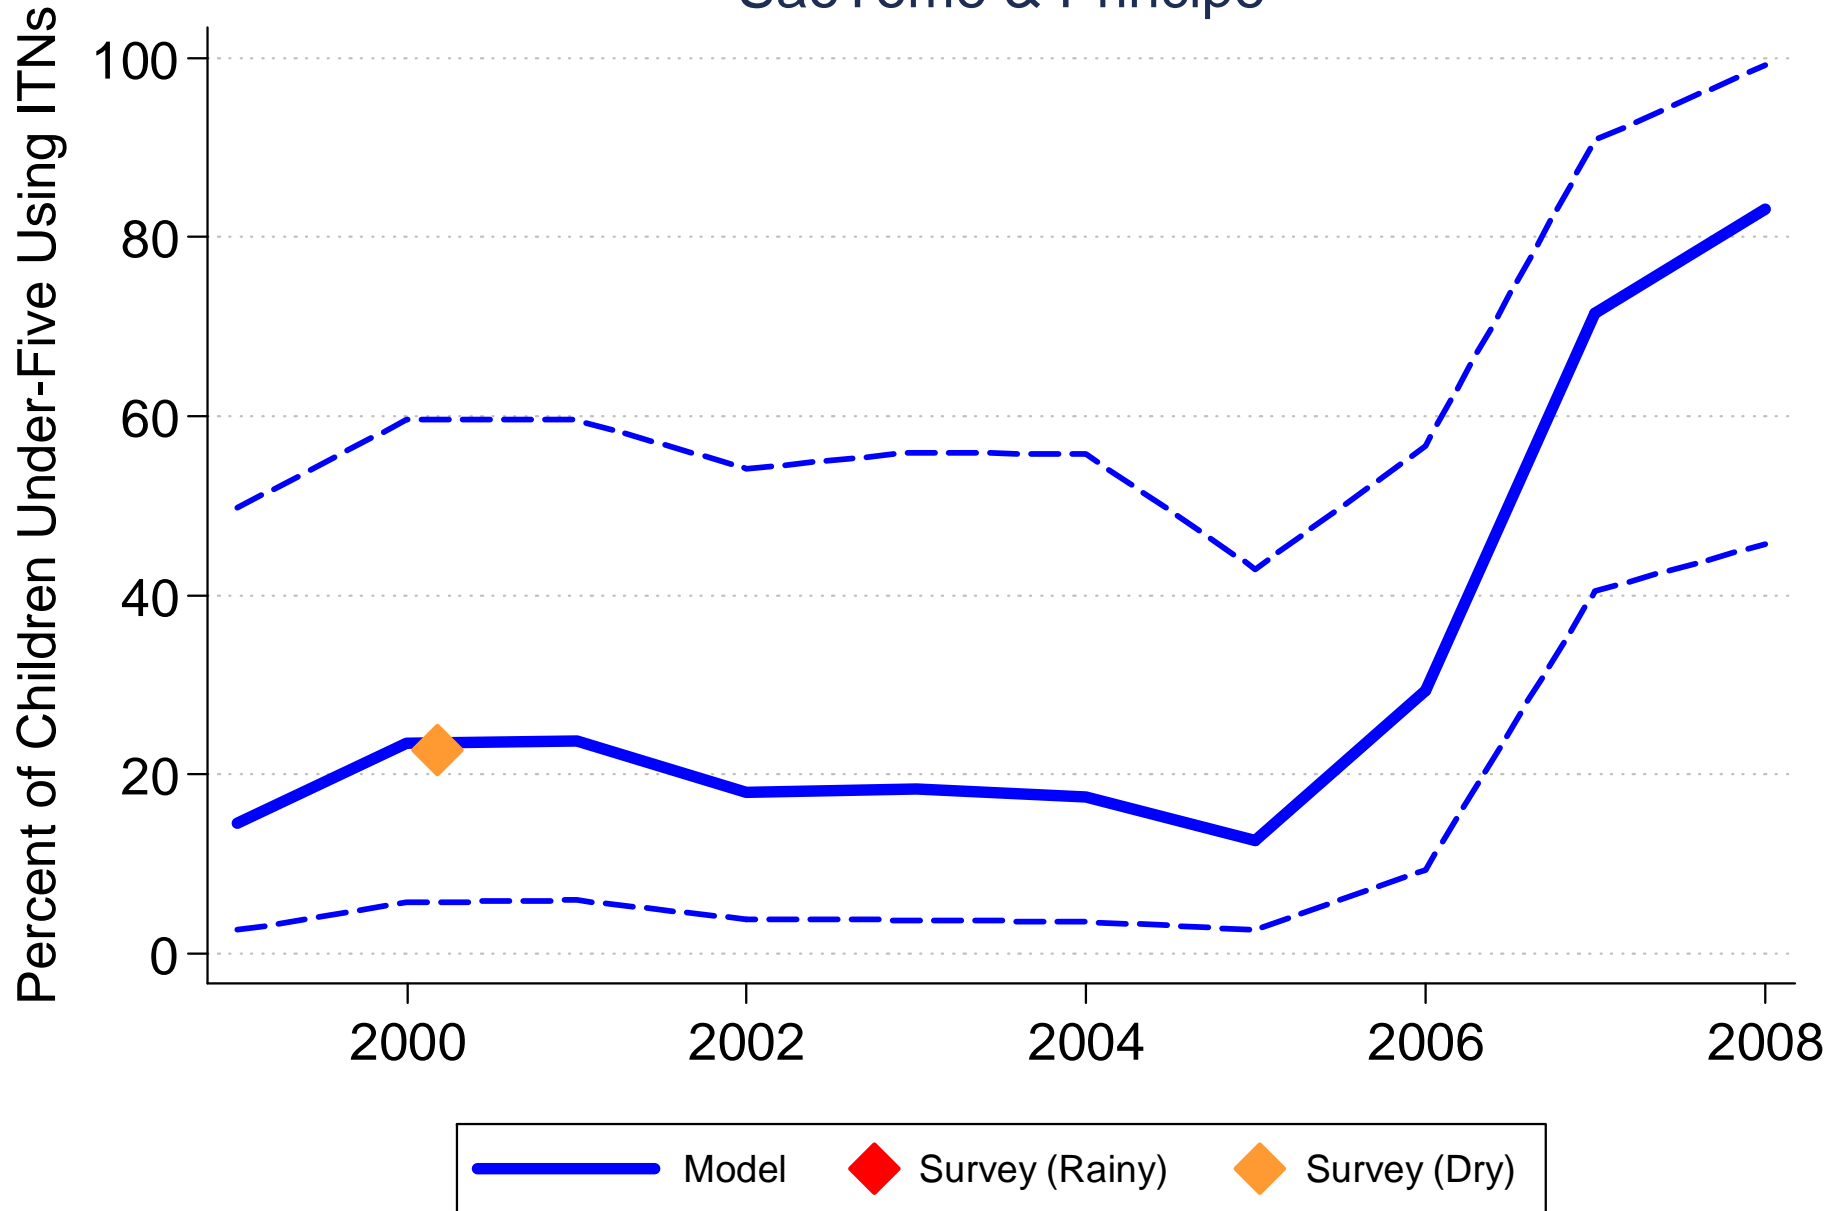

# Senegal

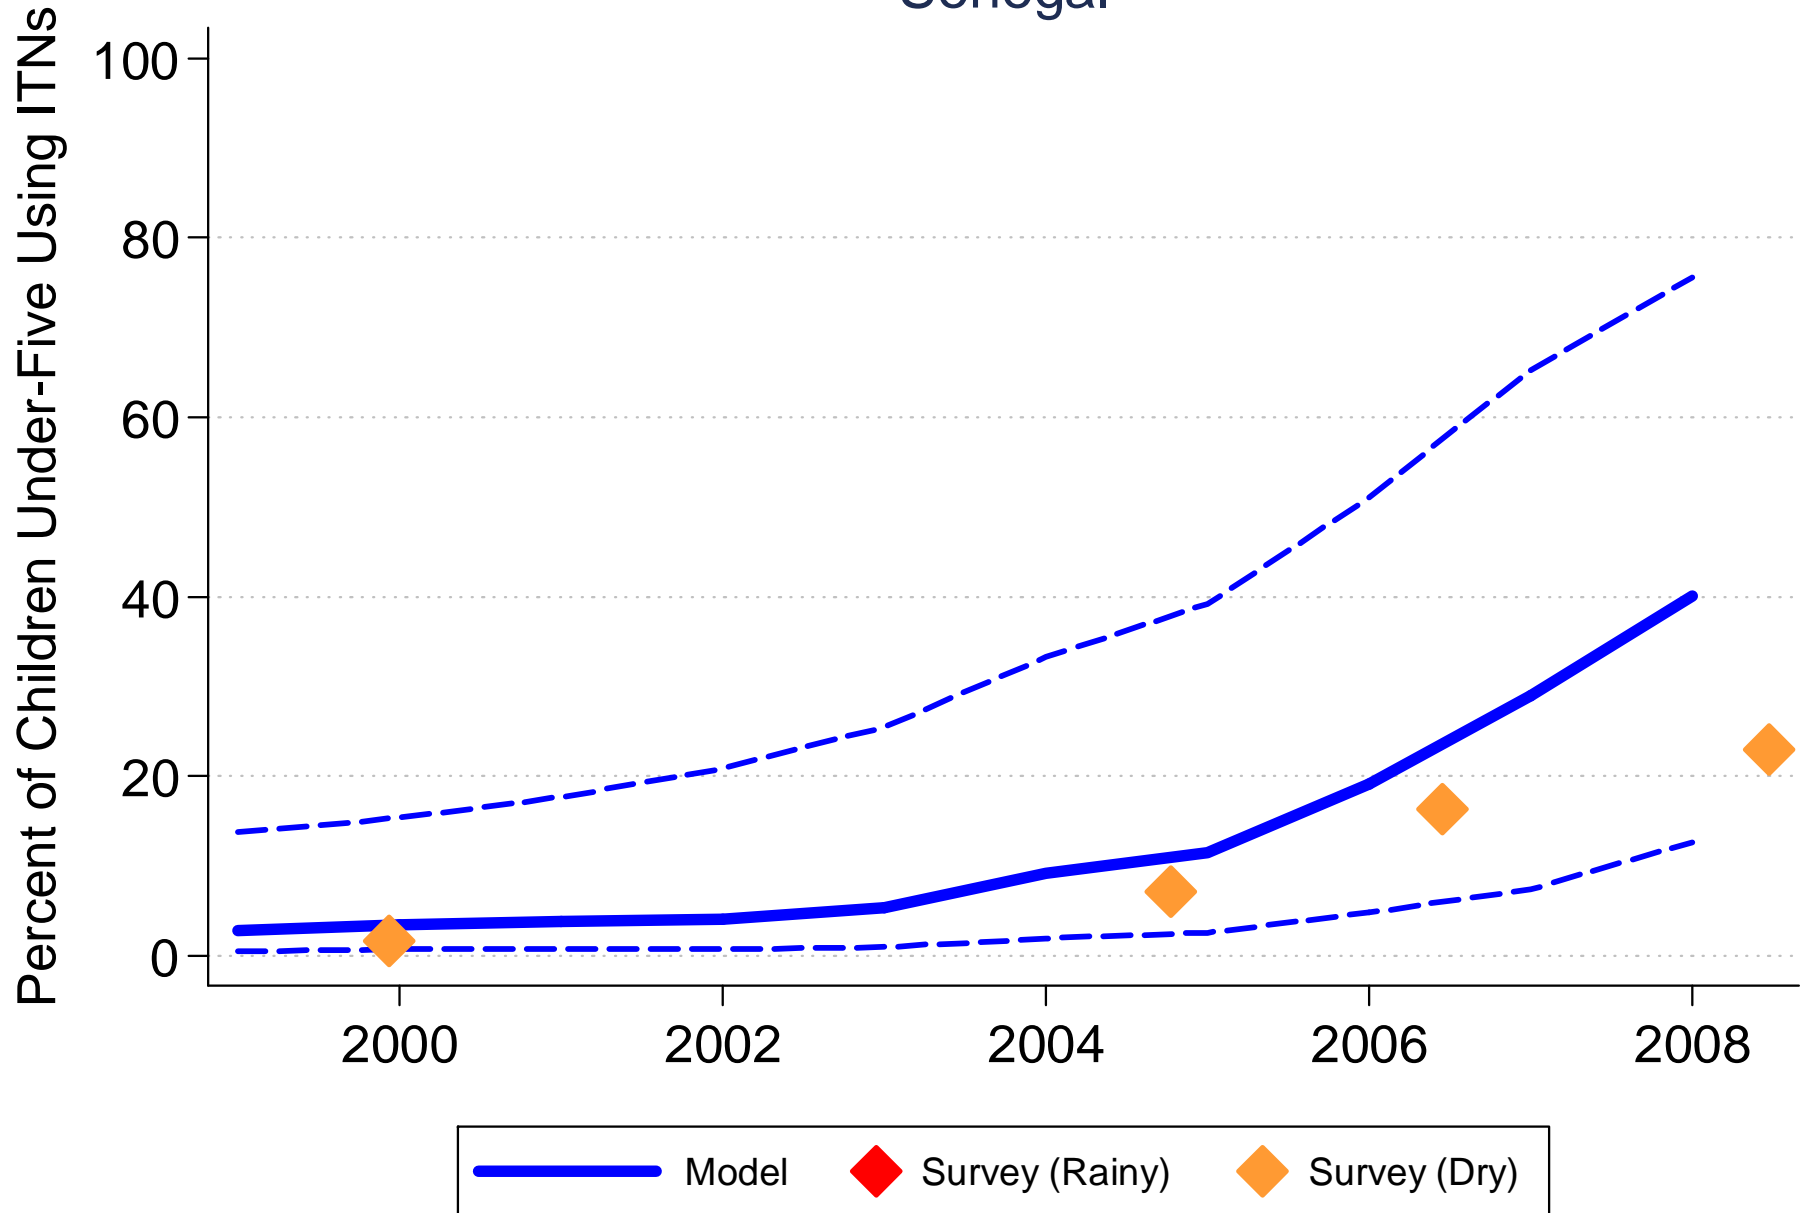

# Sierra Leone

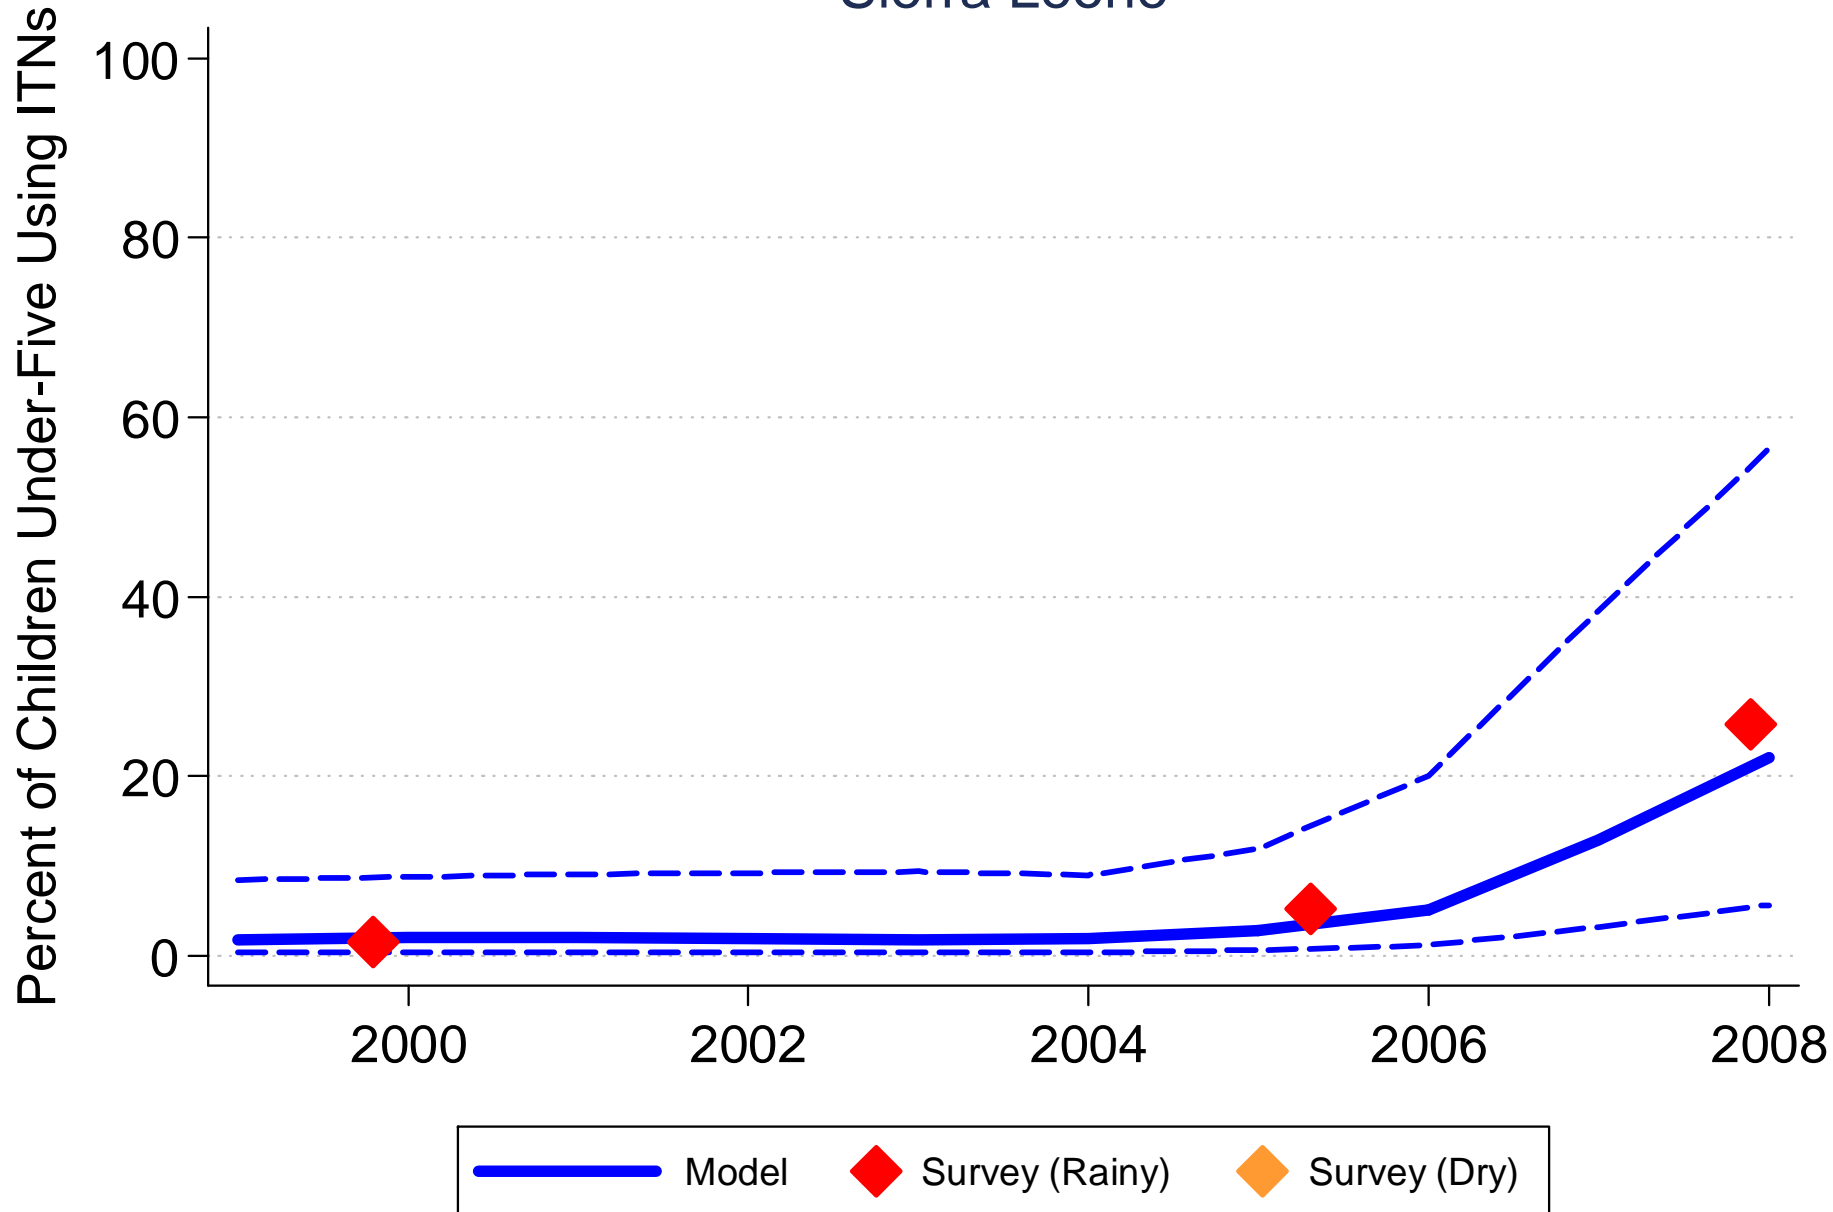

# Somalia

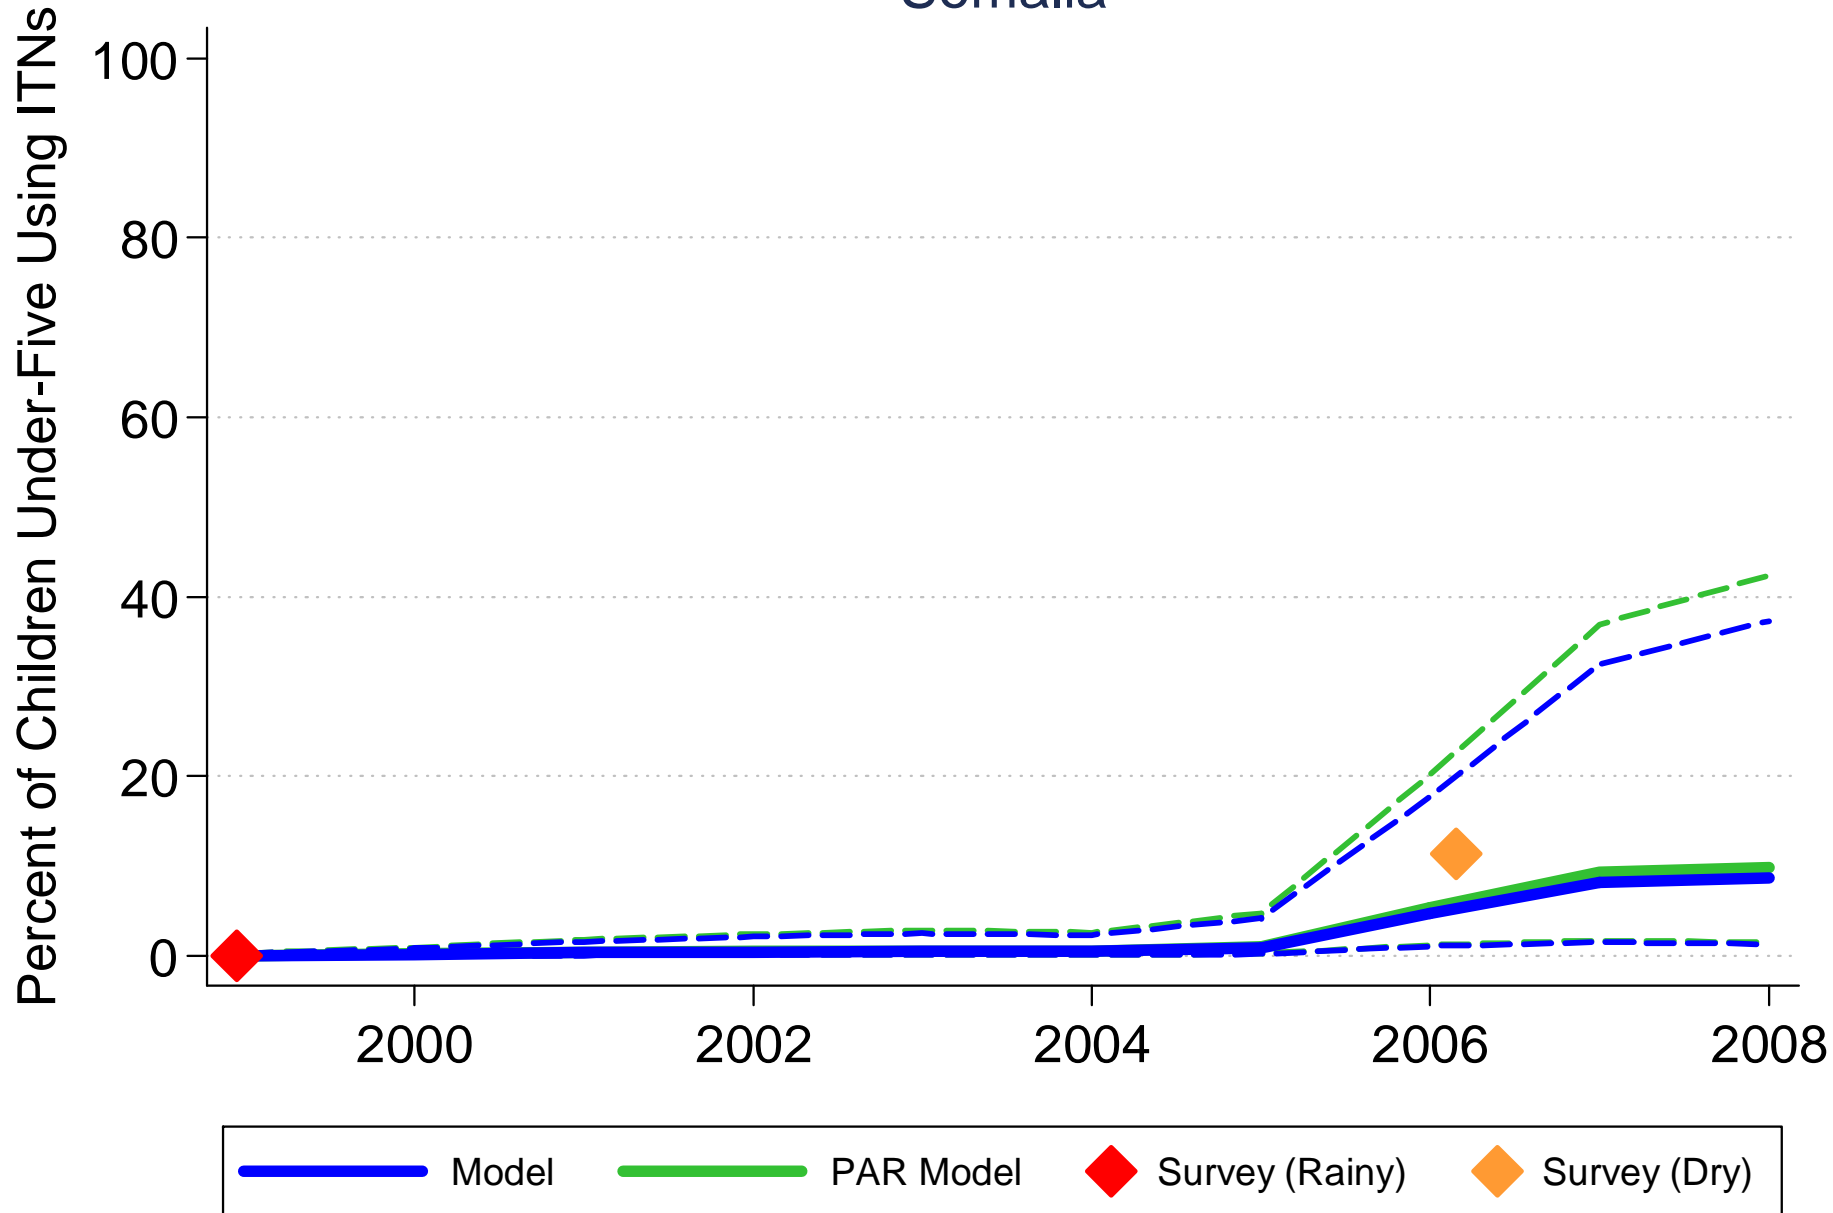

# South Africa

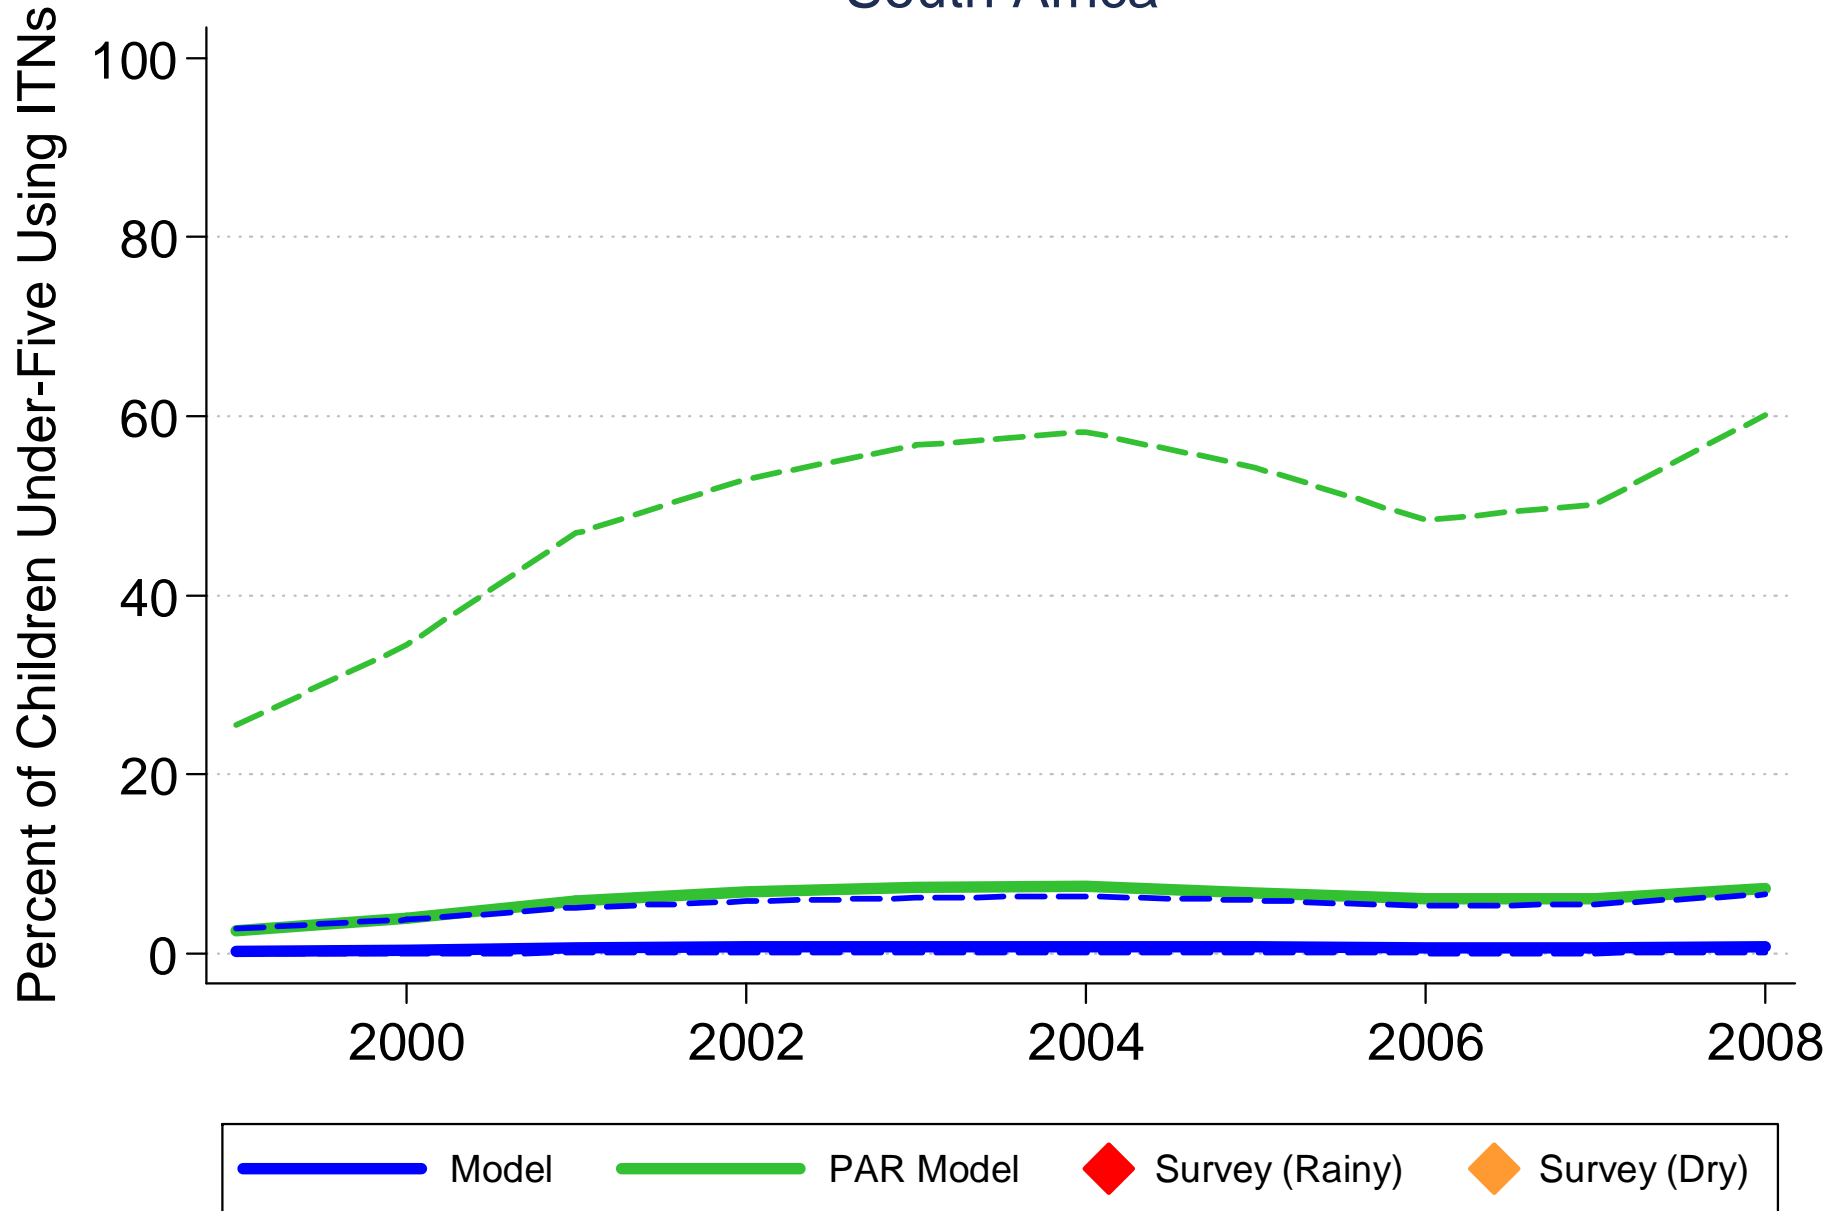

# Sudan

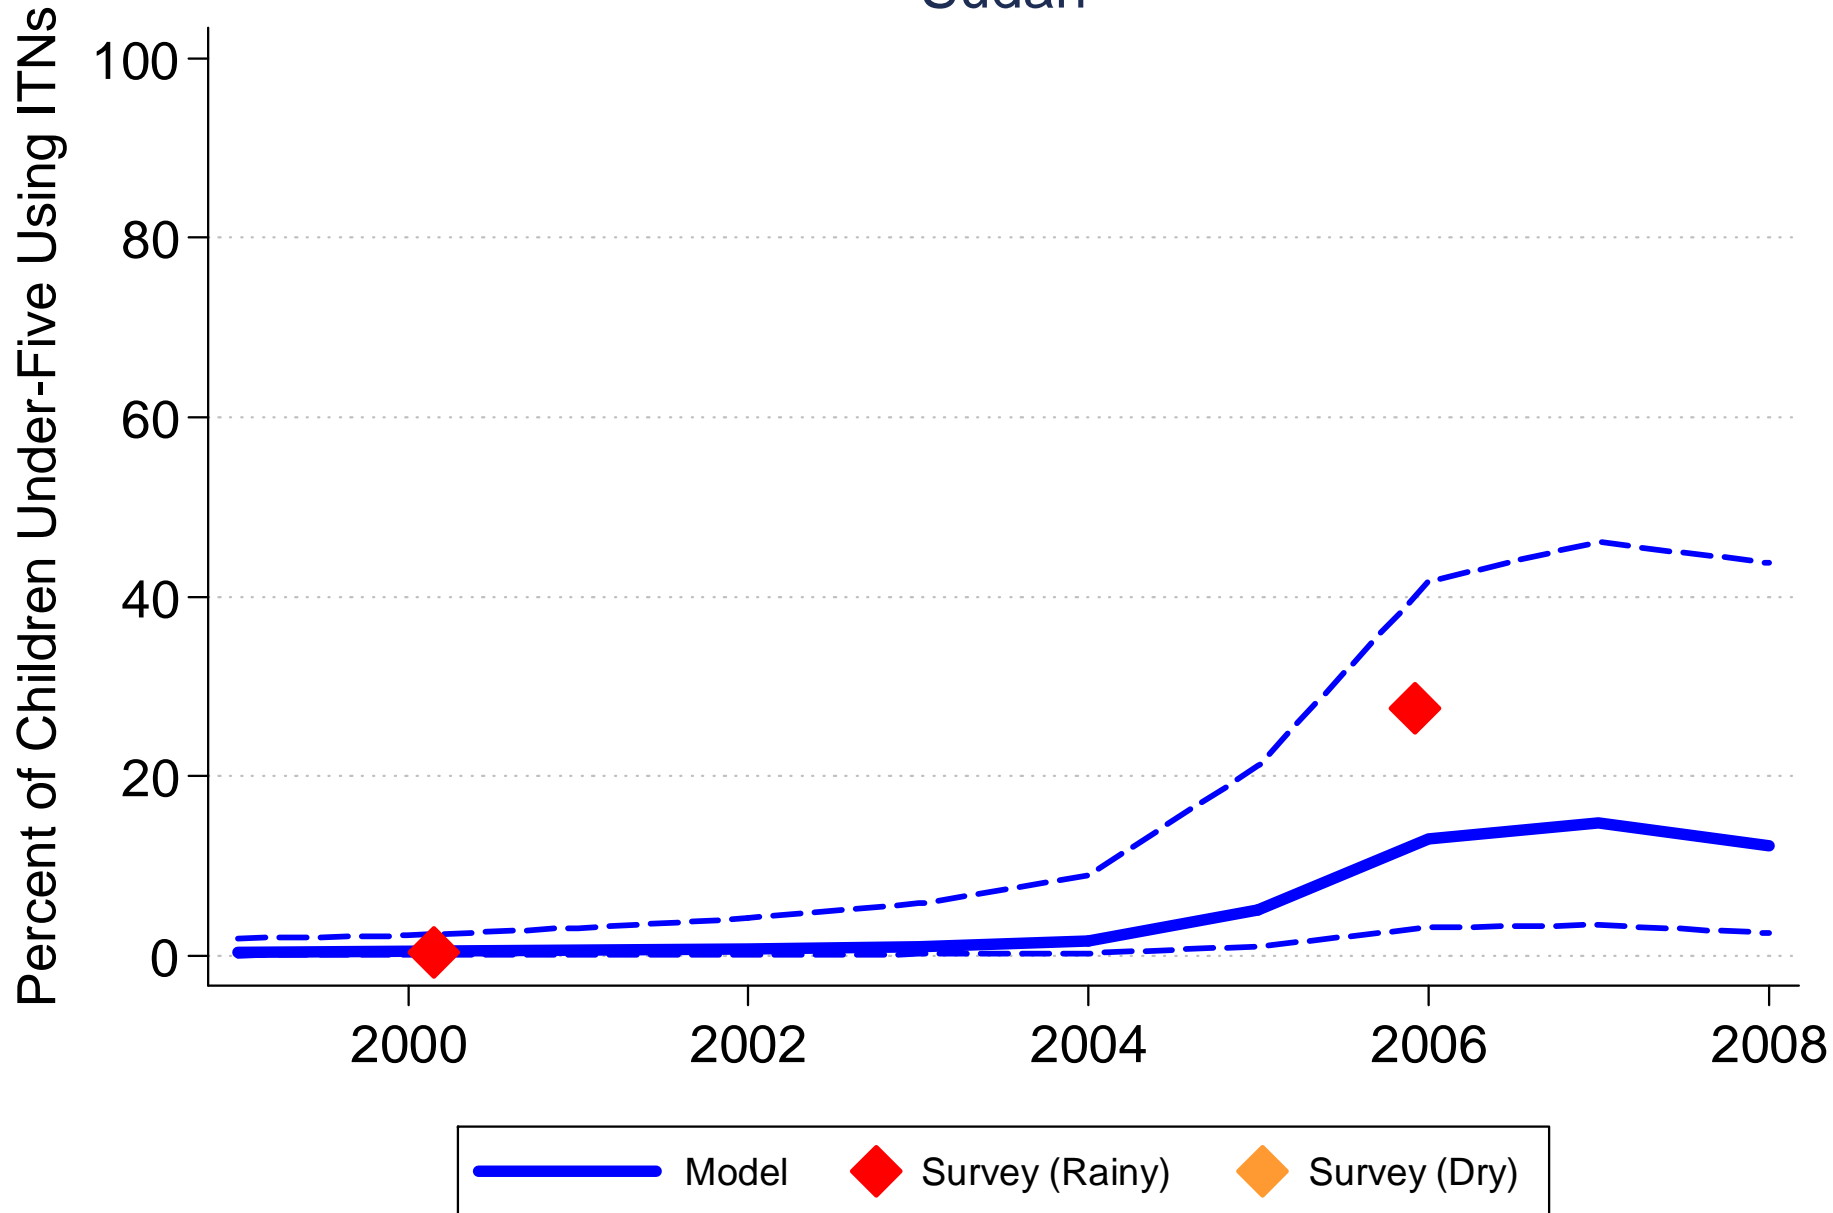

# Swaziland

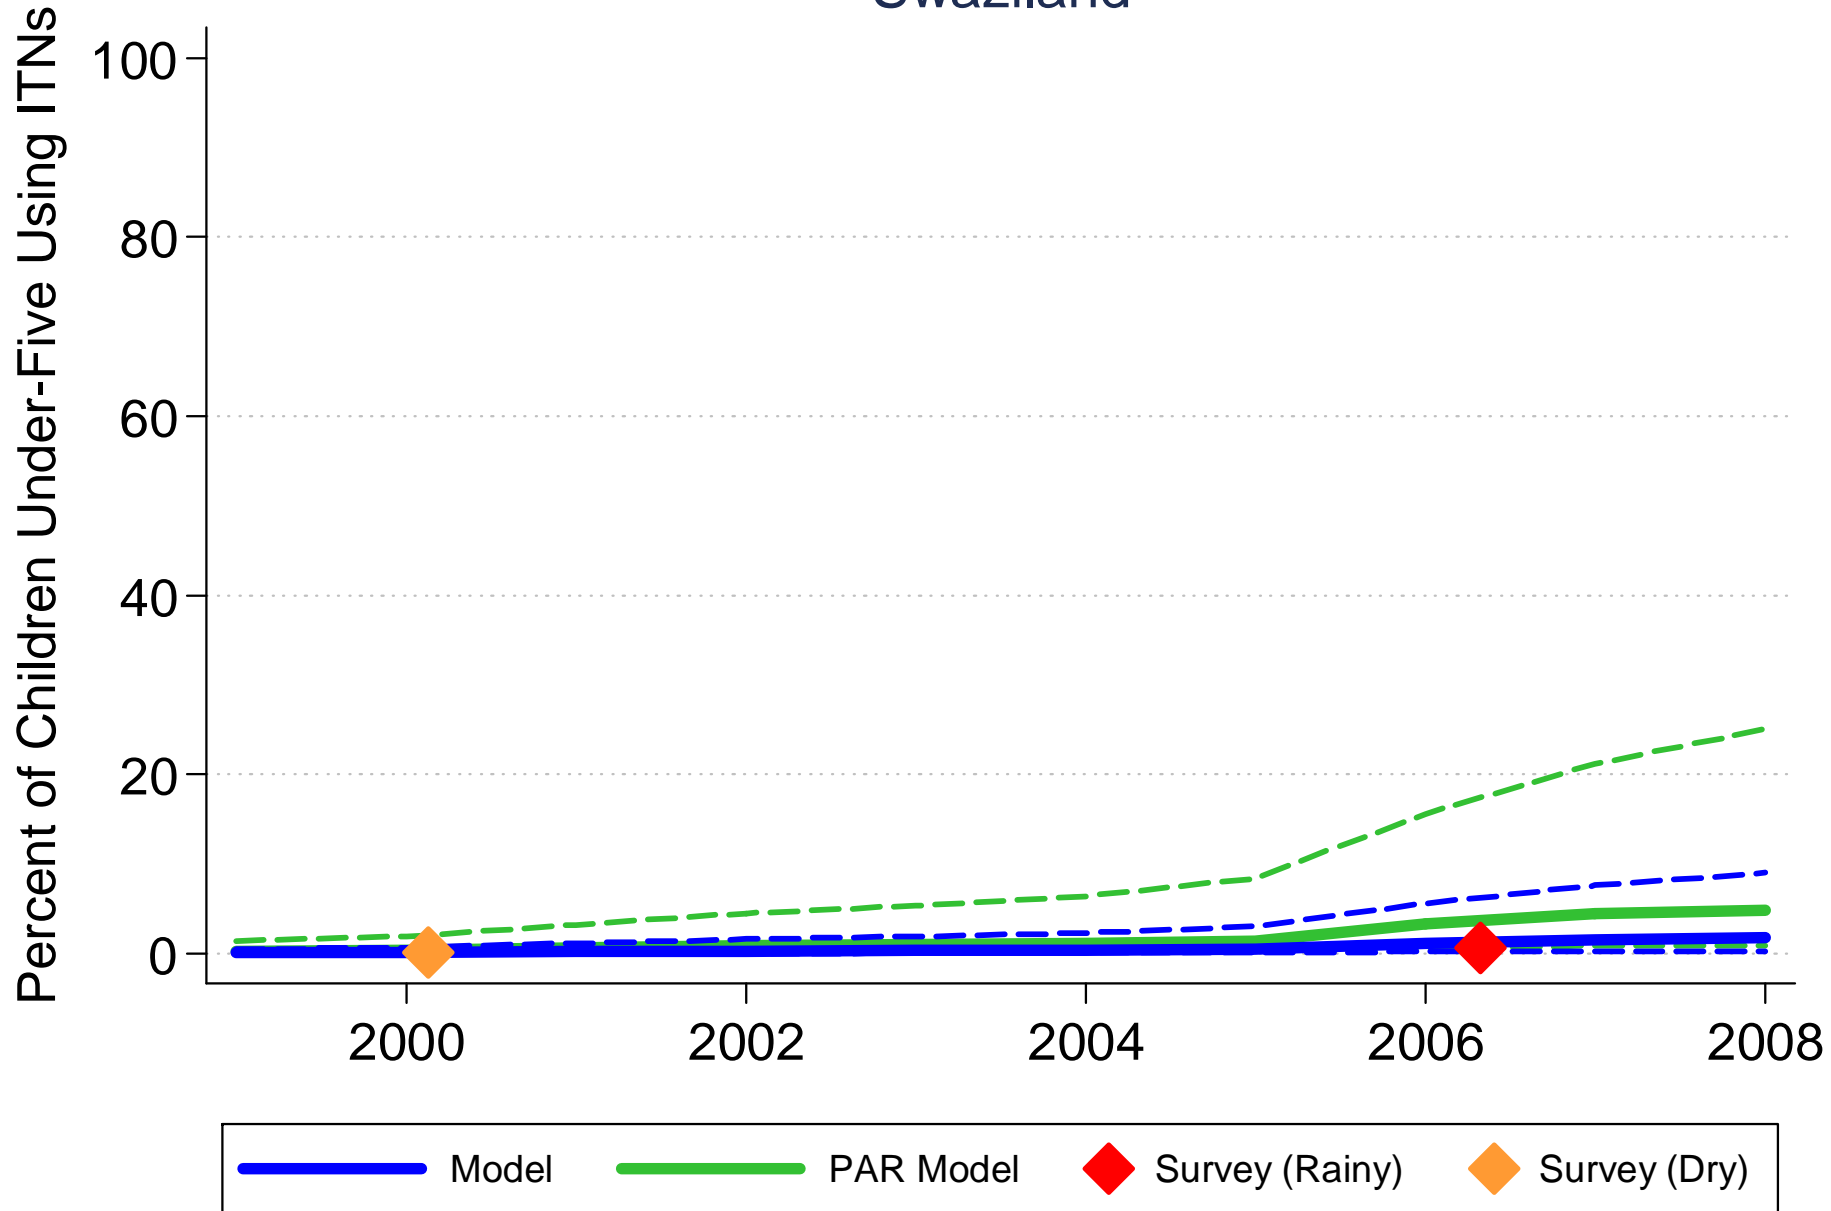

# Tanzania

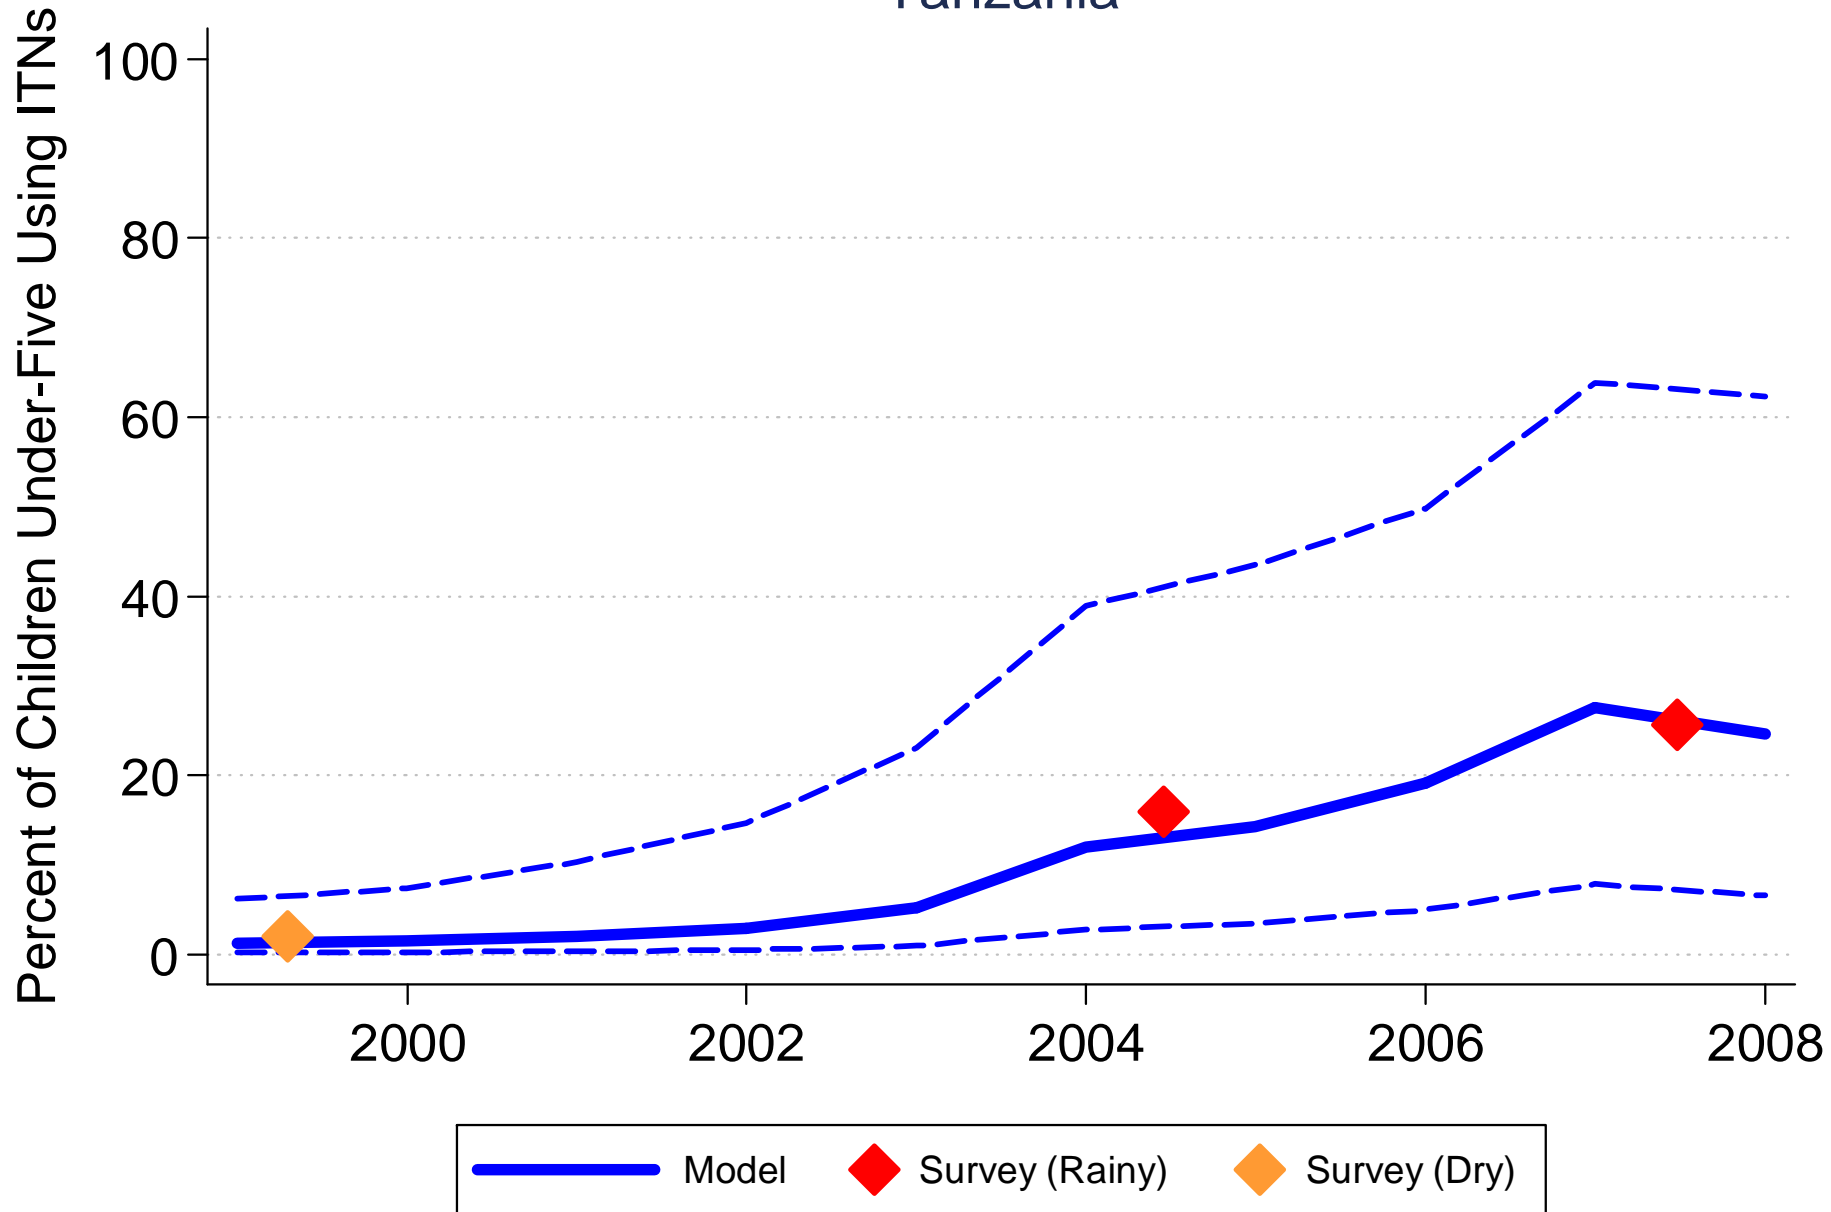



# The Gambia

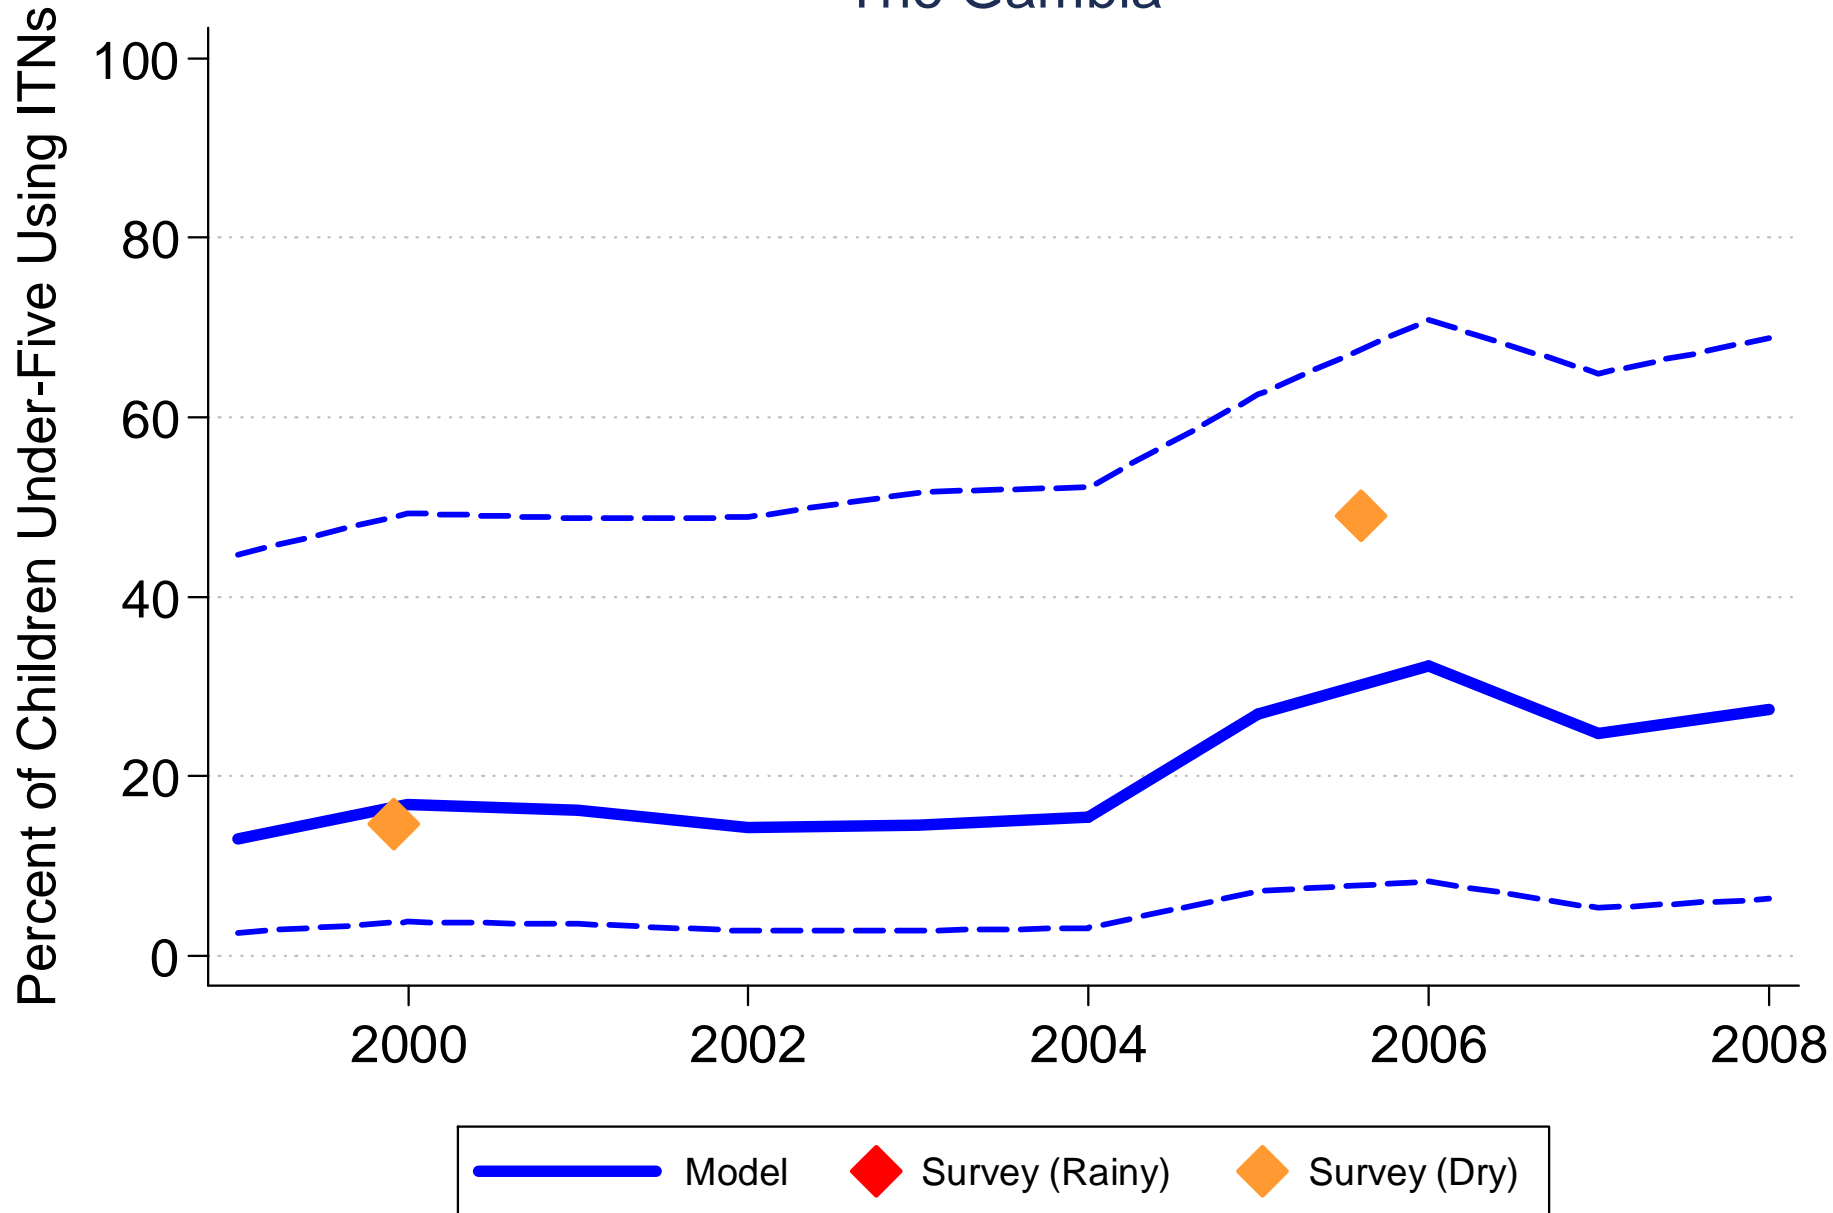

# Togo

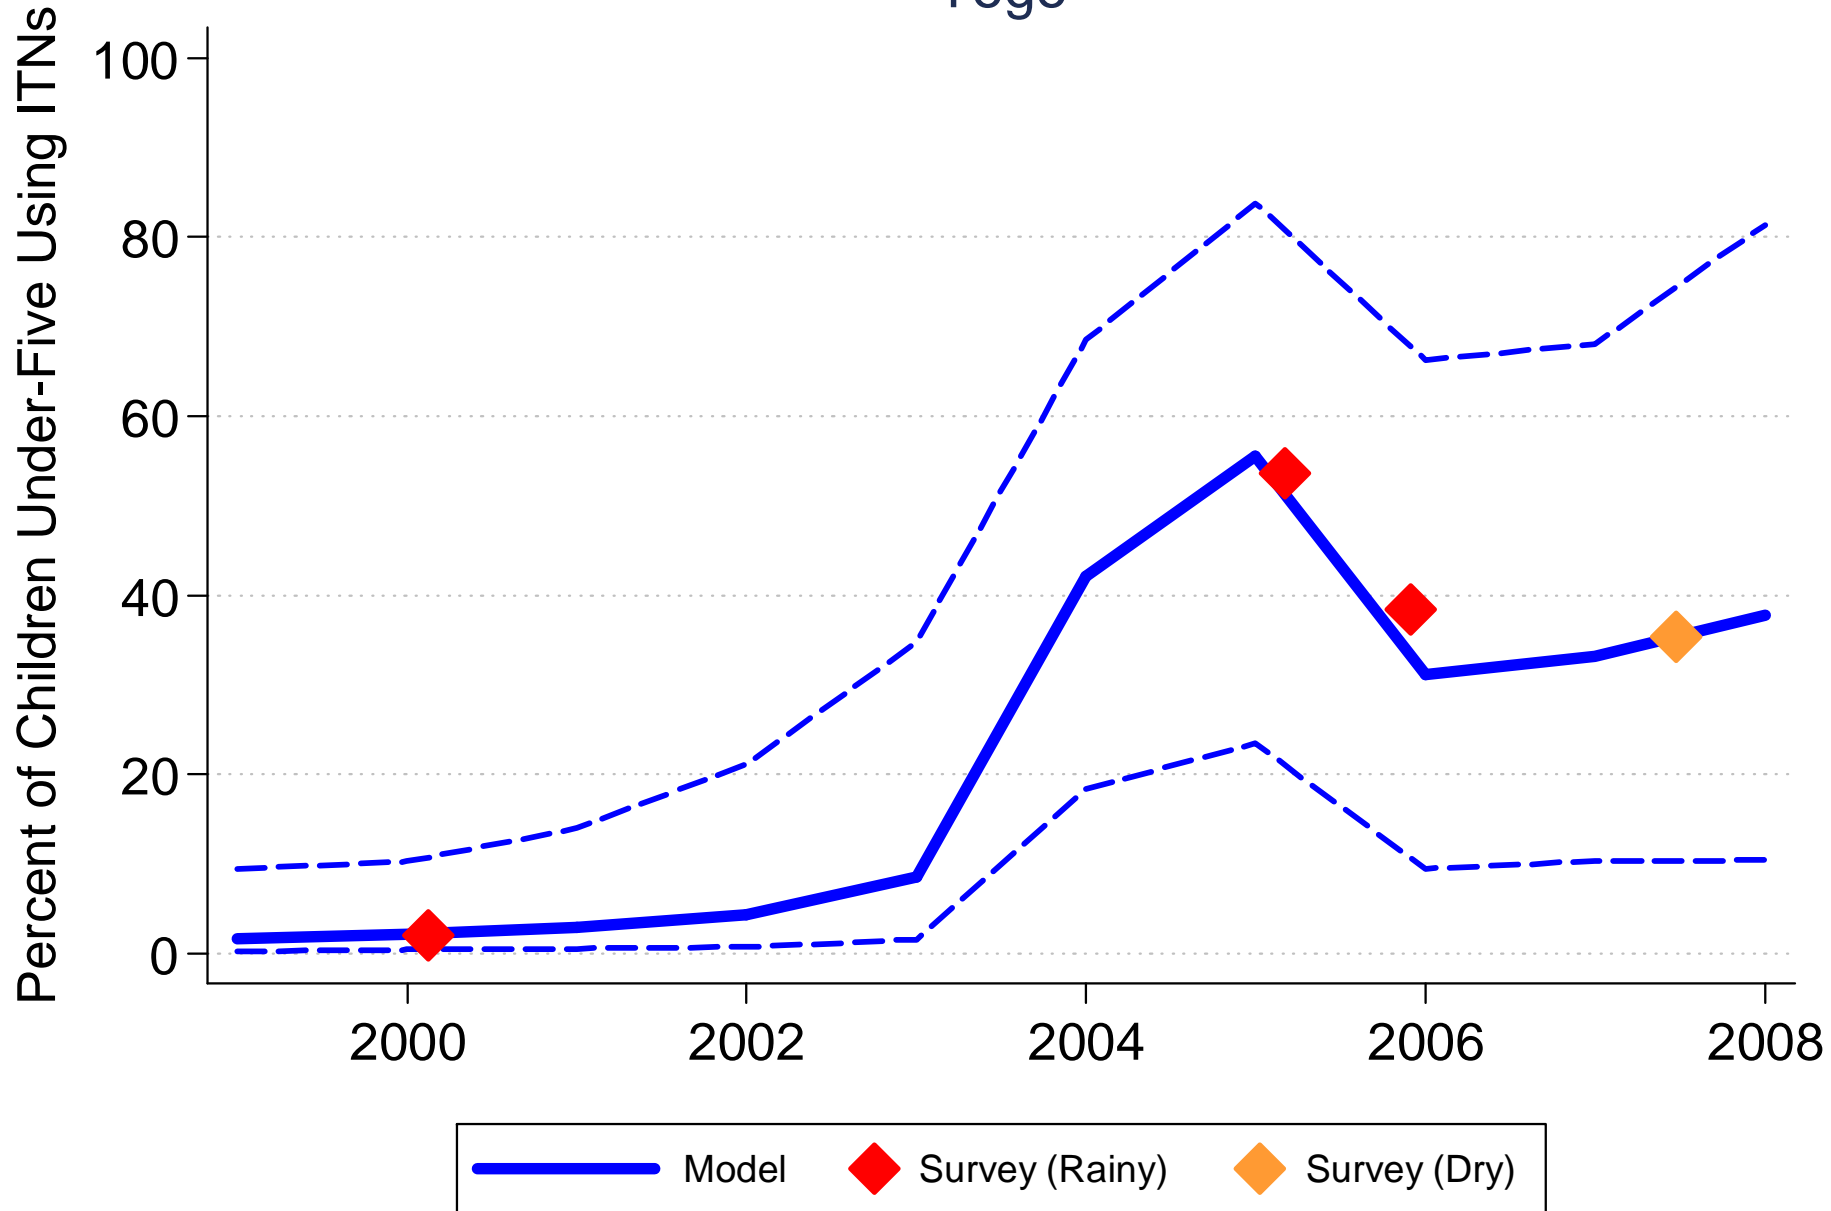

# Uganda

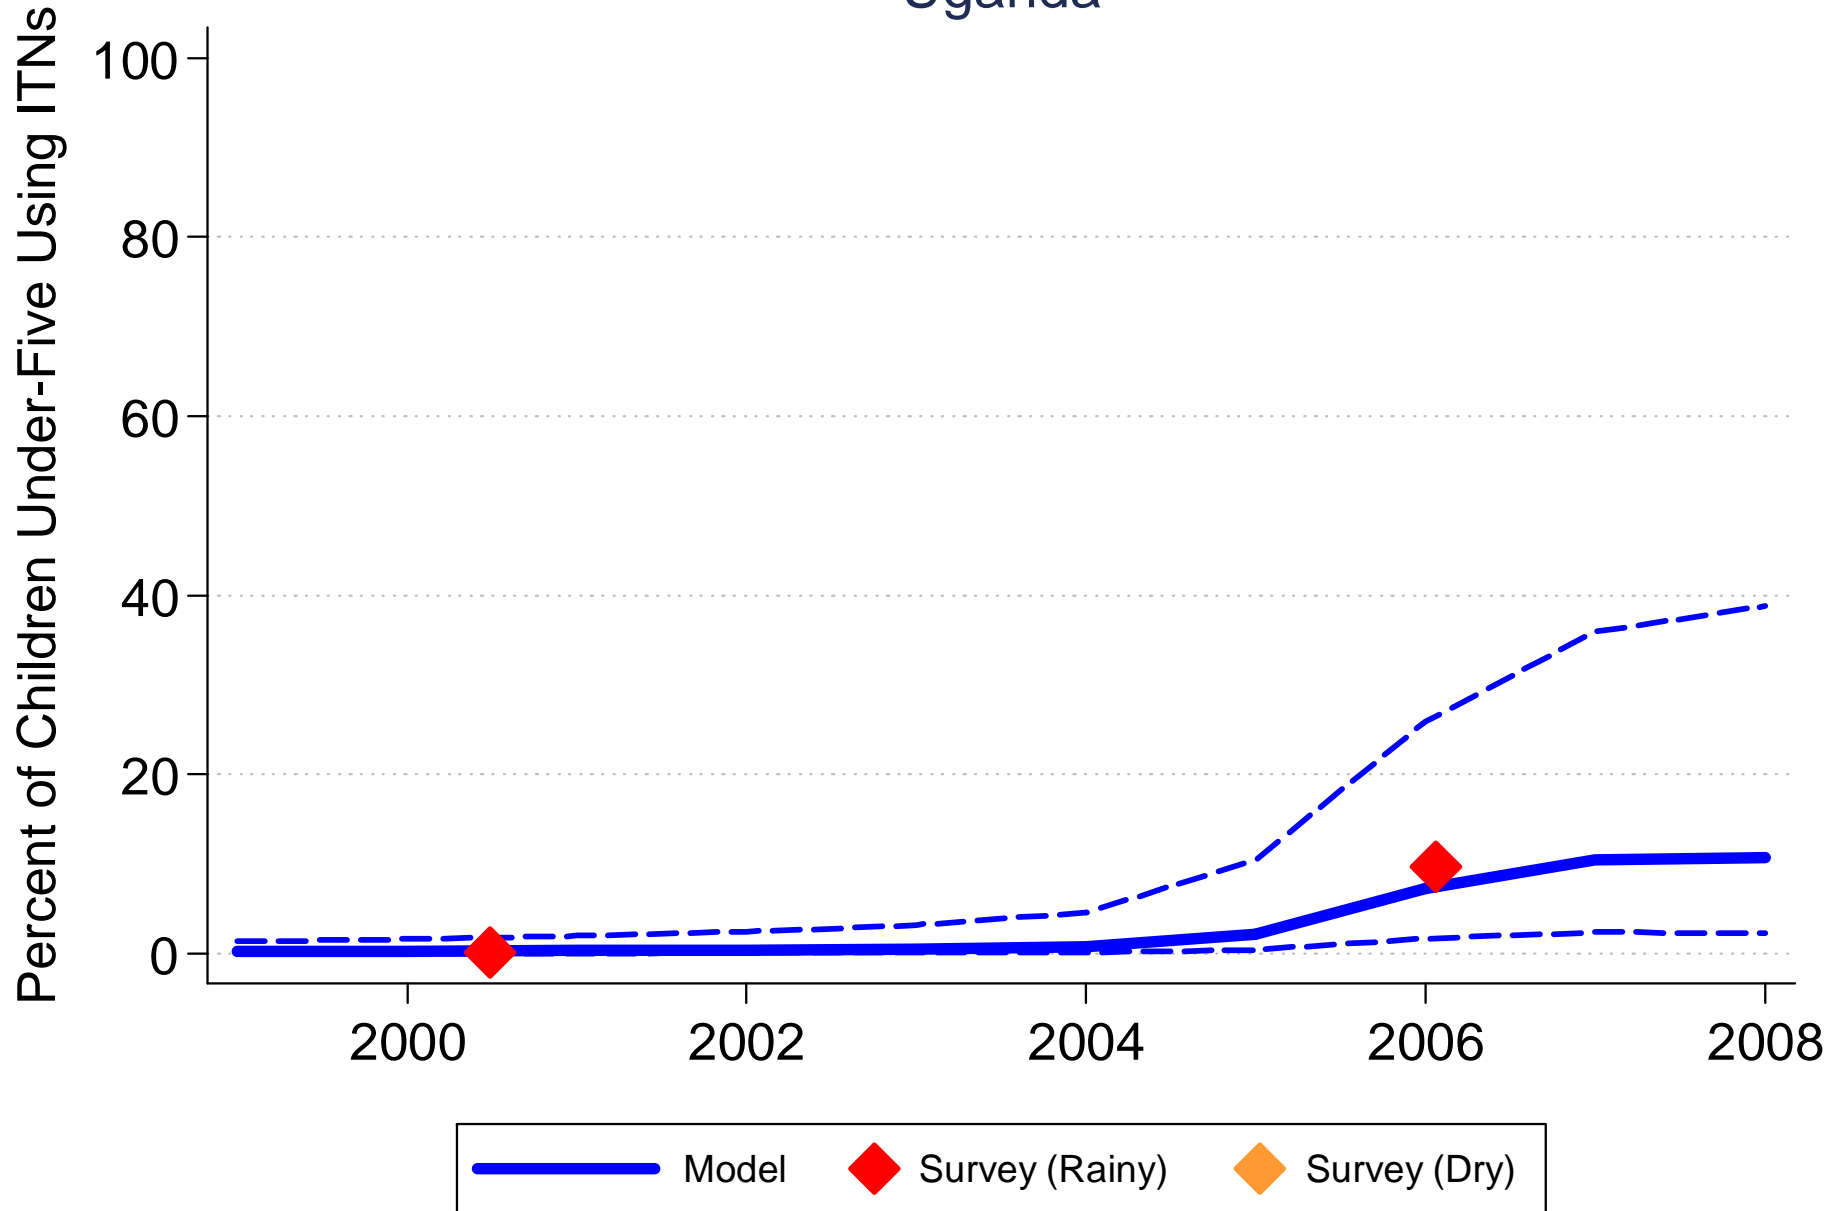

# Zambia

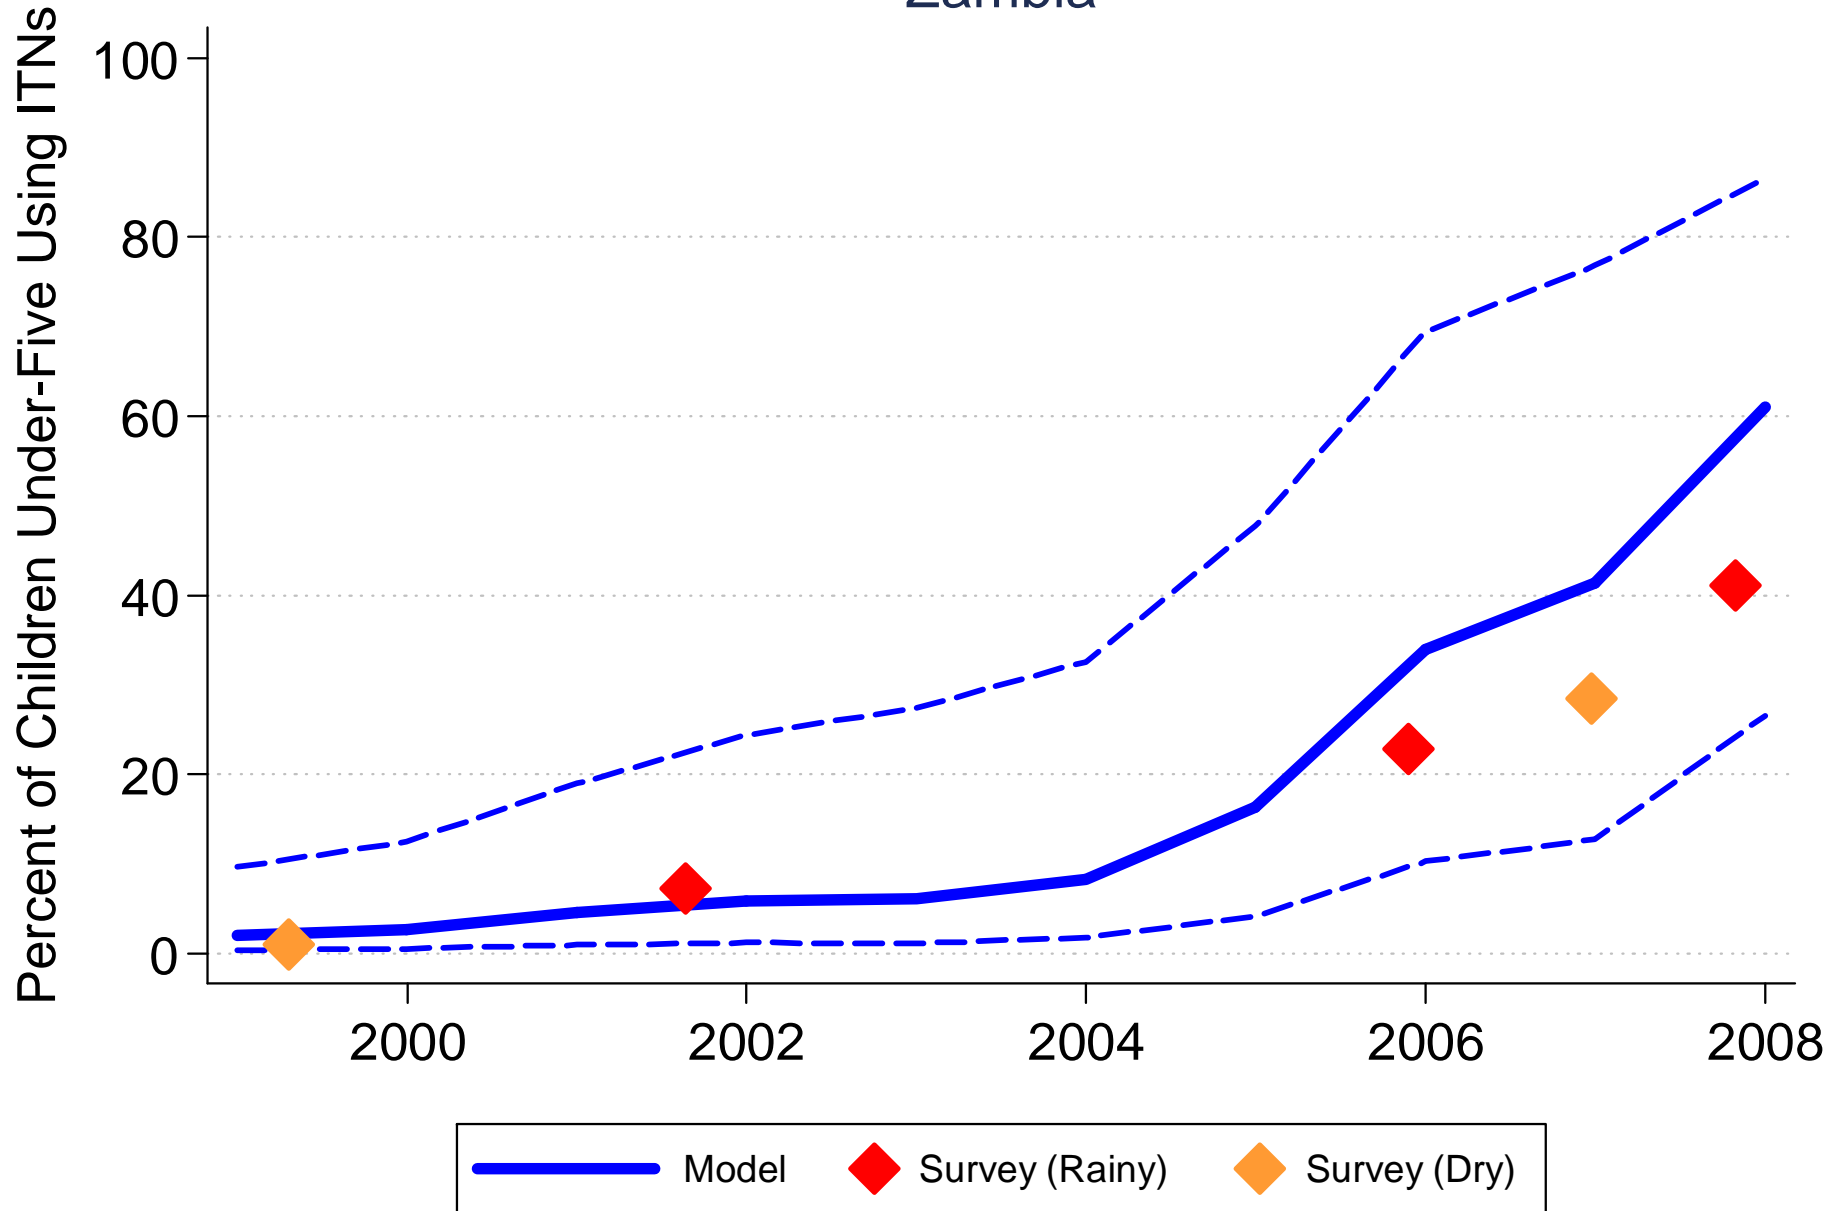

# Zimbabwe

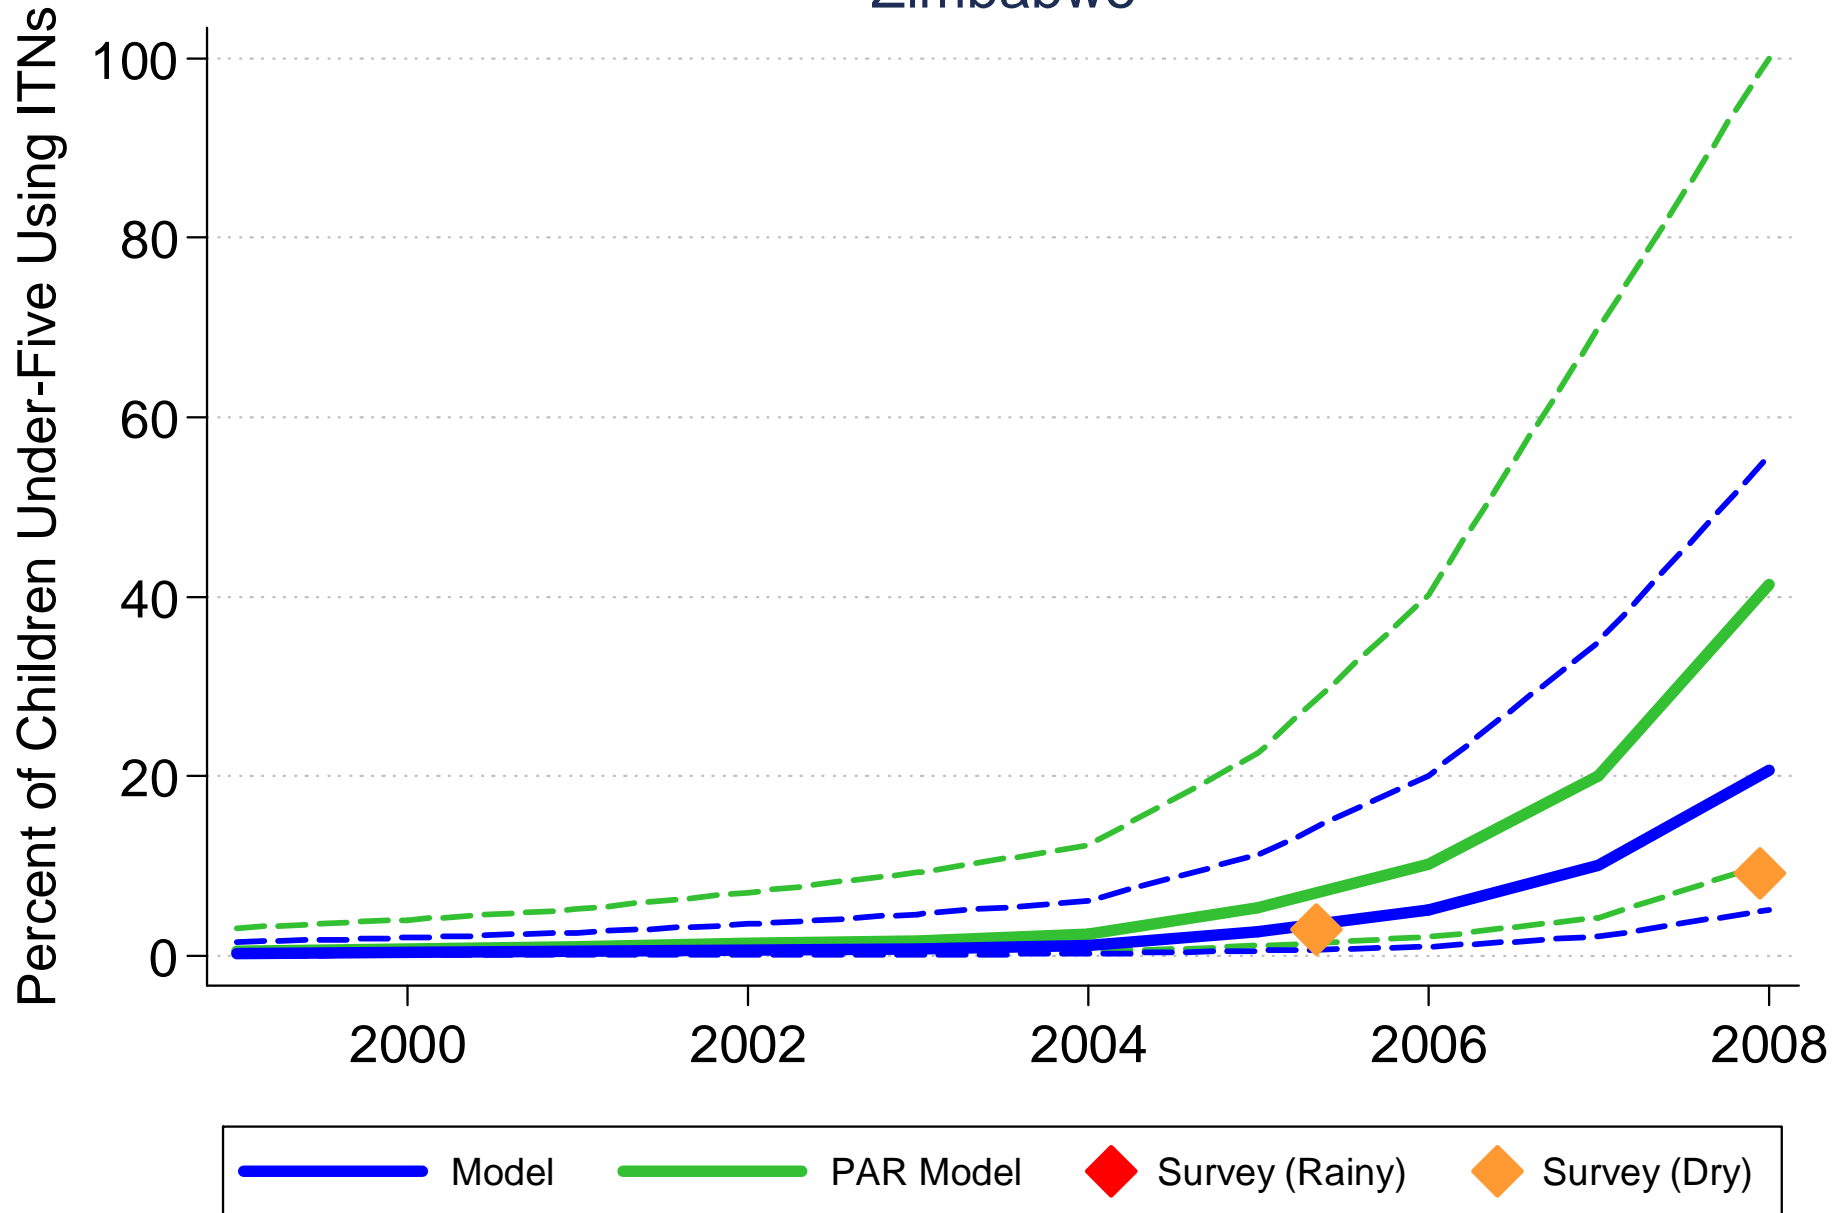

Supplement: pmed.1000328.s002.pdf [file pmed.1000328.s002.pdf]
