# Supplementary material for: Rapid Scaling Up of Insecticide-Treated Bed Net Coverage in Africa and Its Relationship with Development Assistance for Health: A Systematic Synthesis of Supply, Distribution, and Household Survey Data
Source: PubMed Central journal article supplement (PMC2923089; doi:10.1371/journal.pmed.1000328), 2010-08-17
Supplement: pmed.1000328.s004.pdf [file pmed.1000328.s004.pdf]

**Table S2. Total population and population at risk (PAR) of malaria for 44 African countries.**

| <b>Country</b>           | <b>Abbr.</b> | <b>Total Pop.</b> | <b>PAR (%)</b> | <b>Total PAR</b> |
|--------------------------|--------------|-------------------|----------------|------------------|
| Angola                   | AGO          | 17,499,410        | 100            | 17,499,410       |
| Benin                    | BEN          | 9,309,370         | 100            | 9,309,370        |
| Botswana                 | BWA          | 1,905,516         | 48             | 914,648          |
| Burkina Faso             | BFA          | 15,213,310        | 100            | 15,213,310       |
| Burundi                  | BDI          | 8,856,221         | 78             | 6,907,852        |
| Cameroon                 | CMR          | 18,920,240        | 100            | 18,920,240       |
| Central African Republic | CAF          | 4,424,292         | 100            | 4,424,292        |
| Chad                     | TCD          | 11,087,700        | 99             | 10,976,823       |
| Comoros                  | COM          | 860,100           | 100            | 860,100          |
| Congo                    | COG          | 3,847,191         | 100            | 3,847,191        |
| Cote d'Ivoire            | CIV          | 19,624,240        | 100            | 19,624,240       |
| Dem. Rep. of Congo       | COD          | 64,703,620        | 100            | 64,703,620       |
| Djibouti                 | DJI          | 847,715           | 37             | 313,655          |
| Equatorial Guinea        | GNQ          | 519,697           | 100            | 519,697          |
| Eritrea                  | ERI          | 5,005,678         | 100            | 5,005,678        |
| Ethiopia                 | ETH          | 85,219,112        | 68             | 57,948,996       |
| Gabon                    | GAB          | 1,350,156         | 100            | 1,350,156        |
| Ghana                    | GHA          | 23,946,820        | 100            | 23,946,820       |
| Guinea                   | GIN          | 9,572,039         | 100            | 9,572,039        |
| Guinea-Bissau            | GNB          | 1,745,838         | 100            | 1,745,838        |
| Kenya                    | KEN          | 38,549,712        | 76             | 29,297,780       |
| Liberia                  | LBR          | 3,942,212         | 100            | 3,942,212        |
| Madagascar               | MDG          | 20,215,200        | 100            | 20,215,200       |
| Malawi                   | MWI          | 14,288,370        | 100            | 14,288,370       |
| Mali                     | MLI          | 12,716,080        | 100            | 12,716,080       |
| Mauritania               | MRT          | 3,203,648         | 70             | 2,242,554        |
| Mozambique               | MOZ          | 21,812,550        | 100            | 21,812,550       |
| Namibia                  | NAM          | 2,102,140         | 67             | 1,408,434        |
| Niger                    | NER          | 14,730,800        | 100            | 14,730,800       |
| Nigeria                  | NGA          | 151,478,096       | 100            | 151,478,096      |
| Rwanda                   | RWA          | 10,008,620        | 100            | 10,008,620       |
| Sao Tome & Principe      | STP          | 160,174           | 100            | 160,174          |
| Senegal                  | SEN          | 12,687,620        | 100            | 12,687,620       |
| Sierra Leone             | SLE          | 5,968,523         | 100            | 5,968,523        |
| Somalia                  | SOM          | 8,956,006         | 88             | 7,881,285        |
| South Africa             | ZAF          | 48,832,128        | 11             | 5,371,534        |
| Sudan                    | SDN          | 39,445,020        | 100            | 39,445,020       |
| Swaziland                | SWZ          | 1,148,255         | 36             | 413,372          |
| Tanzania                 | TZA          | 41,463,920        | 100            | 41,463,920       |
| The Gambia               | GMB          | 1,754,068         | 100            | 1,754,068        |
| Togo                     | TGO          | 6,762,421         | 100            | 6,762,421        |
| Uganda                   | UGA          | 31,902,610        | 100            | 31,902,610       |
| Zambia                   | ZMB          | 12,154,060        | 100            | 12,154,060       |
| Zimbabwe                 | ZWE          | 13,481,230        | 50             | 6,740,615        |
